# Supplementary material
Source: publisher figshare collection journal article supplement (https://acs.figshare.com/ndownloader/files/5179702)
Supplement: Supplementary file 1 [file 5179702]

data_MeFe
 
_audit_creation_method            SHELXL-97
_chemical_name_systematic
;
 Methyltriphenylphosphonium tris(dicyanamido)ferrate(II)
;
_chemical_name_common             ?
_chemical_melting_point           ?
_chemical_formula_moiety          ?
_chemical_formula_sum
 'C25 H18 Fe N9 P'
_chemical_formula_weight          531.30
 
loop_
 _atom_type_symbol
 _atom_type_description
 _atom_type_scat_dispersion_real
 _atom_type_scat_dispersion_imag
 _atom_type_scat_source
 'C'  'C'   0.0033   0.0016
 'International Tables Vol C Tables 4.2.6.8 and 6.1.1.4'
 'H'  'H'   0.0000   0.0000
 'International Tables Vol C Tables 4.2.6.8 and 6.1.1.4'
 'N'  'N'   0.0061   0.0033
 'International Tables Vol C Tables 4.2.6.8 and 6.1.1.4'
 'P'  'P'   0.1023   0.0942
 'International Tables Vol C Tables 4.2.6.8 and 6.1.1.4'
 'Fe'  'Fe'   0.3463   0.8444
 'International Tables Vol C Tables 4.2.6.8 and 6.1.1.4'
 
_symmetry_cell_setting            Orthorhombic
_symmetry_space_group_name_H-M    P2(1)2(1)2(1)
 
loop_
 _symmetry_equiv_pos_as_xyz
 'x, y, z'
 '-x+1/2, -y, z+1/2'
 '-x, y+1/2, -z+1/2'
 'x+1/2, -y+1/2, -z'
 
_cell_length_a                    13.9104(4)
_cell_length_b                    17.0365(2)
_cell_length_c                    20.8150(5)
_cell_angle_alpha                 90.00
_cell_angle_beta                  90.00
_cell_angle_gamma                 90.00
_cell_volume                      4932.83(19)
_cell_formula_units_Z             8
_cell_measurement_temperature     123(2)
_cell_measurement_reflns_used     ?
_cell_measurement_theta_min       ?
_cell_measurement_theta_max       ?
 
_exptl_crystal_description        block
_exptl_crystal_colour             colourless
_exptl_crystal_size_max           0.58
_exptl_crystal_size_mid           0.25
_exptl_crystal_size_min           0.15
_exptl_crystal_density_meas       ?
_exptl_crystal_density_diffrn     1.431
_exptl_crystal_density_method     'not measured'
_exptl_crystal_F_000              2176
_exptl_absorpt_coefficient_mu     0.710
_exptl_absorpt_correction_type    face-indexed
_exptl_absorpt_correction_T_min   0.8202
_exptl_absorpt_correction_T_max   0.9016
_exptl_absorpt_process_details    ?
 
_exptl_special_details
;
 ?
;
 
_diffrn_ambient_temperature       123(2)
_diffrn_radiation_wavelength      0.71073
_diffrn_radiation_type            MoK\a
_diffrn_radiation_source          'fine-focus sealed tube'
_diffrn_radiation_monochromator   graphite
_diffrn_measurement_device_type   ?
_diffrn_measurement_method        '\w scans'
_diffrn_detector_area_resol_mean  ?
_diffrn_standards_number          ?
_diffrn_standards_interval_count  ?
_diffrn_standards_interval_time   ?
_diffrn_standards_decay_%         ?
_diffrn_reflns_number             35917
_diffrn_reflns_av_R_equivalents   0.0578
_diffrn_reflns_av_sigmaI/netI     0.1203
_diffrn_reflns_limit_h_min        -20
_diffrn_reflns_limit_h_max        13
_diffrn_reflns_limit_k_min        -24
_diffrn_reflns_limit_k_max        18
_diffrn_reflns_limit_l_min        -31
_diffrn_reflns_limit_l_max        26
_diffrn_reflns_theta_min          1.76
_diffrn_reflns_theta_max          32.02
_reflns_number_total              16270
_reflns_number_gt                 10519
_reflns_threshold_expression      >2sigma(I)
 
_computing_data_collection        'Siemens XSCANS'
_computing_cell_refinement        'Siemens XSCANS'
_computing_data_reduction         'Siemens SHELXTL'
_computing_structure_solution     'SHELXS-97 (Sheldrick, 1990)'
_computing_structure_refinement   'SHELXL-97 (Sheldrick, 1997)'
_computing_molecular_graphics     'Siemens SHELXTL'
_computing_publication_material   'Siemens SHELXTL'
 
_refine_special_details
;
 Refinement of F^2^ against ALL reflections.  The weighted R-factor wR and
 goodness of fit S are based on F^2^, conventional R-factors R are based
 on F, with F set to zero for negative F^2^. The threshold expression of
 F^2^ > 2sigma(F^2^) is used only for calculating R-factors(gt) etc. and is
 not relevant to the choice of reflections for refinement.  R-factors based
 on F^2^ are statistically about twice as large as those based on F, and R-
 factors based on ALL data will be even larger.
;
 
_refine_ls_structure_factor_coef  Fsqd
_refine_ls_matrix_type            full
_refine_ls_weighting_scheme       calc
_refine_ls_weighting_details
 'calc w=1/[\s^2^(Fo^2^)+(0.0273P)^2^+0.0000P] where P=(Fo^2^+2Fc^2^)/3'
_atom_sites_solution_primary      direct
_atom_sites_solution_secondary    difmap
_atom_sites_solution_hydrogens    geom
_refine_ls_hydrogen_treatment     mixed
_refine_ls_extinction_method      none
_refine_ls_extinction_coef        ?
_refine_ls_abs_structure_details
 'Flack H D (1983), Acta Cryst. A39, 876-881'
_refine_ls_abs_structure_Flack    0.015(9)
_refine_ls_number_reflns          16270
_refine_ls_number_parameters      649
_refine_ls_number_restraints      0
_refine_ls_R_factor_all           0.1120
_refine_ls_R_factor_gt            0.0537
_refine_ls_wR_factor_ref          0.0852
_refine_ls_wR_factor_gt           0.0737
_refine_ls_goodness_of_fit_ref    0.993
_refine_ls_restrained_S_all       0.993
_refine_ls_shift/su_max           0.002
_refine_ls_shift/su_mean          0.000
 
loop_
 _atom_site_label
 _atom_site_type_symbol
 _atom_site_fract_x
 _atom_site_fract_y
 _atom_site_fract_z
 _atom_site_U_iso_or_equiv
 _atom_site_adp_type
 _atom_site_occupancy
 _atom_site_symmetry_multiplicity
 _atom_site_calc_flag
 _atom_site_refinement_flags
 _atom_site_disorder_assembly
 _atom_site_disorder_group
Fe1 Fe -0.12352(2) 0.199745(17) 0.075632(16) 0.01409(8) Uani 1 1 d . . .
Fe2 Fe 0.03537(2) 0.199408(18) 0.416915(17) 0.01703(8) Uani 1 1 d . . .
N11 N -0.17311(15) 0.20676(12) 0.17315(10) 0.0231(5) Uani 1 1 d . . .
C11 C -0.19272(18) 0.21020(13) 0.22631(13) 0.0200(5) Uani 1 1 d . . .
N12 N -0.10558(17) 0.21424(12) 0.37401(11) 0.0273(5) Uani 1 1 d . . .
C12 C -0.15729(19) 0.21308(13) 0.33118(13) 0.0224(6) Uani 1 1 d . . .
N13 N -0.22353(17) 0.21207(14) 0.28611(11) 0.0358(6) Uani 1 1 d . . .
N21 N 0.01973(15) 0.18791(11) 0.11774(10) 0.0222(5) Uani 1 1 d . . .
C21 C 0.07102(17) 0.18347(12) 0.16069(13) 0.0159(5) Uani 1 1 d . . .
N22 N 0.09199(16) 0.19166(12) 0.32048(11) 0.0260(5) Uani 1 1 d . . .
C22 C 0.10862(18) 0.18641(13) 0.26648(13) 0.0210(6) Uani 1 1 d . . .
N23 N 0.13617(16) 0.17915(11) 0.20635(10) 0.0250(5) Uani 1 1 d . . .
N31 N -0.06698(15) 0.20053(12) -0.02246(10) 0.0227(5) Uani 1 1 d . . .
C31 C -0.00662(19) 0.23392(14) -0.04822(12) 0.0199(6) Uani 1 1 d . . .
N32 N 0.22537(15) 0.28599(10) -0.05257(10) 0.0187(5) Uani 1 1 d . . .
C32 C 0.1449(2) 0.27872(13) -0.06426(11) 0.0205(6) Uani 1 1 d . . .
N33 N 0.05494(16) 0.27385(13) -0.08183(12) 0.0382(6) Uani 1 1 d . . .
N41 N -0.09907(16) 0.32390(11) 0.07184(11) 0.0259(5) Uani 1 1 d . . .
C41 C -0.05685(19) 0.38031(13) 0.06110(12) 0.0210(6) Uani 1 1 d . . .
N42 N -0.01641(17) 0.57625(11) 0.07670(11) 0.0301(5) Uani 1 1 d . . .
C42 C -0.01478(18) 0.51070(13) 0.06415(12) 0.0194(6) Uani 1 1 d . . .
N43 N -0.00122(17) 0.43880(11) 0.04500(11) 0.0299(6) Uani 1 1 d . . .
N51 N 0.17723(18) 0.18470(12) 0.45800(11) 0.0314(6) Uani 1 1 d . . .
C51 C 0.2603(2) 0.18577(13) 0.45857(12) 0.0237(6) Uani 1 1 d . . .
N52 N 0.46581(16) 0.28496(11) 0.48826(10) 0.0238(5) Uani 1 1 d . . .
C52 C 0.40882(19) 0.23831(15) 0.47478(12) 0.0195(6) Uani 1 1 d . . .
N53 N 0.35395(17) 0.17986(11) 0.45737(11) 0.0286(6) Uani 1 1 d . . .
N61 N 0.06097(17) 0.32270(11) 0.41411(11) 0.0316(6) Uani 1 1 d . . .
C61 C 0.10489(19) 0.37924(13) 0.41005(13) 0.0232(6) Uani 1 1 d . . .
N62 N 0.13552(16) 0.57615(10) 0.42936(10) 0.0231(5) Uani 1 1 d . . .
C62 C 0.14274(18) 0.51017(13) 0.41837(13) 0.0212(5) Uani 1 1 d . . .
N63 N 0.16422(17) 0.43805(11) 0.40316(12) 0.0315(6) Uani 1 1 d . . .
P1 P 0.26244(5) 0.59984(3) 0.65895(3) 0.01637(14) Uani 1 1 d . . .
C111 C 0.36700(18) 0.56453(12) 0.69972(11) 0.0156(5) Uani 1 1 d . . .
C112 C 0.36380(19) 0.49361(13) 0.73352(12) 0.0203(6) Uani 1 1 d . . .
H11A H 0.3074 0.4622 0.7325 0.024 Uiso 1 1 calc R . .
C113 C 0.44247(18) 0.46955(14) 0.76821(13) 0.0235(6) Uani 1 1 d . . .
H11B H 0.4403 0.4213 0.7911 0.028 Uiso 1 1 calc R . .
C114 C 0.52432(19) 0.51475(14) 0.77011(12) 0.0233(6) Uani 1 1 d . . .
H11C H 0.5781 0.4978 0.7945 0.028 Uiso 1 1 calc R . .
C115 C 0.52866(19) 0.58538(14) 0.73630(13) 0.0268(6) Uani 1 1 d . . .
H11D H 0.5855 0.6162 0.7371 0.032 Uiso 1 1 calc R . .
C116 C 0.44975(18) 0.61007(13) 0.70172(13) 0.0218(6) Uani 1 1 d . . .
H11E H 0.4520 0.6585 0.6791 0.026 Uiso 1 1 calc R . .
C121 C 0.19261(19) 0.51863(13) 0.62926(11) 0.0191(6) Uani 1 1 d . . .
C122 C 0.0930(2) 0.51956(15) 0.63216(13) 0.0262(6) Uani 1 1 d . . .
H12A H 0.0606 0.5615 0.6531 0.031 Uiso 1 1 calc R . .
C123 C 0.0407(2) 0.45905(16) 0.60441(14) 0.0332(7) Uani 1 1 d . . .
H12B H -0.0276 0.4595 0.6061 0.040 Uiso 1 1 calc R . .
C124 C 0.0881(2) 0.39819(15) 0.57433(14) 0.0342(7) Uani 1 1 d . . .
H12C H 0.0521 0.3569 0.5553 0.041 Uiso 1 1 calc R . .
C125 C 0.1874(2) 0.39640(15) 0.57143(14) 0.0329(7) Uani 1 1 d . . .
H12D H 0.2191 0.3539 0.5509 0.040 Uiso 1 1 calc R . .
C126 C 0.2406(2) 0.45700(13) 0.59867(12) 0.0239(6) Uani 1 1 d . . .
H12E H 0.3088 0.4565 0.5965 0.029 Uiso 1 1 calc R . .
C131 C 0.19382(18) 0.65865(13) 0.71369(12) 0.0175(5) Uani 1 1 d . . .
C132 C 0.1349(2) 0.71872(14) 0.69048(13) 0.0314(7) Uani 1 1 d . . .
H13A H 0.1292 0.7274 0.6456 0.038 Uiso 1 1 calc R . .
C133 C 0.0848(2) 0.76563(16) 0.73360(15) 0.0348(7) Uani 1 1 d . . .
H13B H 0.0442 0.8063 0.7180 0.042 Uiso 1 1 calc R . .
C134 C 0.0936(2) 0.75355(15) 0.79879(15) 0.0358(8) Uani 1 1 d . . .
H13C H 0.0599 0.7864 0.8280 0.043 Uiso 1 1 calc R . .
C135 C 0.1512(2) 0.69377(15) 0.82168(13) 0.0321(7) Uani 1 1 d . . .
H13D H 0.1563 0.6850 0.8666 0.038 Uiso 1 1 calc R . .
C136 C 0.2015(2) 0.64656(14) 0.77930(13) 0.0249(6) Uani 1 1 d . . .
H13E H 0.2415 0.6058 0.7953 0.030 Uiso 1 1 calc R . .
C140 C 0.29512(19) 0.65758(13) 0.59070(11) 0.0214(6) Uani 1 1 d . . .
H14A H 0.3333 0.7028 0.6047 0.032 Uiso 1 1 calc R . .
H14B H 0.2369 0.6761 0.5690 0.032 Uiso 1 1 calc R . .
H14C H 0.3331 0.6256 0.5609 0.032 Uiso 1 1 calc R . .
P2 P 0.35877(5) -0.06159(3) 0.15887(3) 0.01922(14) Uani 1 1 d . . .
C211 C 0.47502(18) -0.01648(12) 0.15713(12) 0.0191(5) Uani 1 1 d . . .
C212 C 0.50958(19) 0.02514(14) 0.20980(13) 0.0226(6) Uani 1 1 d . . .
H21A H 0.4723 0.0283 0.2480 0.027 Uiso 1 1 calc R . .
C213 C 0.59798(19) 0.06197(14) 0.20674(13) 0.0236(6) Uani 1 1 d . . .
H21B H 0.6216 0.0903 0.2427 0.028 Uiso 1 1 calc R . .
C214 C 0.65170(19) 0.05737(14) 0.15125(13) 0.0260(6) Uani 1 1 d . . .
H21C H 0.7122 0.0831 0.1491 0.031 Uiso 1 1 calc R . .
C215 C 0.6186(2) 0.01566(15) 0.09857(13) 0.0289(6) Uani 1 1 d . . .
H21D H 0.6563 0.0128 0.0606 0.035 Uiso 1 1 calc R . .
C216 C 0.5302(2) -0.02195(14) 0.10134(12) 0.0243(6) Uani 1 1 d . . .
H21E H 0.5074 -0.0512 0.0656 0.029 Uiso 1 1 calc R . .
C221 C 0.27954(18) -0.01076(13) 0.10512(11) 0.0195(6) Uani 1 1 d . . .
C222 C 0.1921(2) -0.04626(15) 0.08870(13) 0.0278(6) Uani 1 1 d . . .
H22A H 0.1776 -0.0975 0.1039 0.033 Uiso 1 1 calc R . .
C223 C 0.1272(2) -0.00690(17) 0.05057(14) 0.0364(7) Uani 1 1 d . . .
H22B H 0.0680 -0.0311 0.0394 0.044 Uiso 1 1 calc R . .
C224 C 0.1480(2) 0.06801(17) 0.02844(13) 0.0353(7) Uani 1 1 d . . .
H22C H 0.1025 0.0956 0.0030 0.042 Uiso 1 1 calc R . .
C225 C 0.2349(2) 0.10238(16) 0.04343(13) 0.0325(7) Uani 1 1 d . . .
H22D H 0.2496 0.1531 0.0273 0.039 Uiso 1 1 calc R . .
C226 C 0.3010(2) 0.06333(14) 0.08192(13) 0.0263(6) Uani 1 1 d . . .
H22E H 0.3607 0.0874 0.0923 0.032 Uiso 1 1 calc R . .
C231 C 0.31392(18) -0.05334(13) 0.23893(12) 0.0191(5) Uani 1 1 d . . .
C232 C 0.3237(2) -0.11356(14) 0.28402(13) 0.0270(6) Uani 1 1 d . . .
H23A H 0.3498 -0.1627 0.2713 0.032 Uiso 1 1 calc R . .
C233 C 0.2961(2) -0.10223(15) 0.34607(14) 0.0344(7) Uani 1 1 d . . .
H23B H 0.3019 -0.1439 0.3761 0.041 Uiso 1 1 calc R . .
C234 C 0.2594(2) -0.03035(14) 0.36595(13) 0.0295(7) Uani 1 1 d . . .
H23C H 0.2416 -0.0226 0.4095 0.035 Uiso 1 1 calc R . .
C235 C 0.2491(2) 0.02973(15) 0.32207(12) 0.0281(6) Uani 1 1 d . . .
H23D H 0.2236 0.0788 0.3355 0.034 Uiso 1 1 calc R . .
C236 C 0.27580(18) 0.01902(14) 0.25857(12) 0.0244(6) Uani 1 1 d . . .
H23E H 0.2683 0.0605 0.2285 0.029 Uiso 1 1 calc R . .
C240 C 0.3692(2) -0.16201(13) 0.13351(13) 0.0290(7) Uani 1 1 d . . .
H24A H 0.4130 -0.1900 0.1624 0.044 Uiso 1 1 calc R . .
H24B H 0.3946 -0.1638 0.0896 0.044 Uiso 1 1 calc R . .
H24C H 0.3058 -0.1870 0.1346 0.044 Uiso 1 1 calc R . .
 
loop_
 _atom_site_aniso_label
 _atom_site_aniso_U_11
 _atom_site_aniso_U_22
 _atom_site_aniso_U_33
 _atom_site_aniso_U_23
 _atom_site_aniso_U_13
 _atom_site_aniso_U_12
Fe1 0.01591(18) 0.01101(14) 0.01534(17) 0.00056(14) -0.00015(15) -0.00020(14)
Fe2 0.0210(2) 0.01194(15) 0.01810(18) 0.00002(15) -0.00080(16) -0.00137(15)
N11 0.0214(12) 0.0299(11) 0.0182(12) -0.0008(10) -0.0017(10) 0.0040(10)
C11 0.0149(13) 0.0200(13) 0.0252(15) -0.0019(11) -0.0017(11) 0.0030(10)
N12 0.0269(14) 0.0332(13) 0.0218(13) 0.0001(10) -0.0026(11) 0.0005(10)
C12 0.0245(15) 0.0242(13) 0.0186(14) -0.0027(10) 0.0058(12) 0.0090(11)
N13 0.0209(13) 0.0689(17) 0.0176(13) 0.0002(11) 0.0024(11) 0.0157(12)
N21 0.0206(12) 0.0242(11) 0.0218(12) -0.0005(9) -0.0015(10) 0.0016(10)
C21 0.0140(12) 0.0108(11) 0.0231(14) 0.0000(10) 0.0061(12) 0.0003(9)
N22 0.0287(13) 0.0271(11) 0.0221(13) -0.0027(10) -0.0017(10) 0.0014(10)
C22 0.0179(14) 0.0177(13) 0.0273(16) 0.0007(11) -0.0013(12) 0.0015(10)
N23 0.0143(12) 0.0406(13) 0.0200(12) 0.0009(9) -0.0014(10) 0.0029(10)
N31 0.0210(12) 0.0309(11) 0.0162(11) 0.0012(10) -0.0002(9) -0.0026(11)
C31 0.0184(15) 0.0252(13) 0.0160(14) 0.0018(10) -0.0046(11) 0.0027(11)
N32 0.0183(12) 0.0205(11) 0.0173(11) 0.0000(8) 0.0012(9) -0.0008(9)
C32 0.0287(16) 0.0194(12) 0.0135(13) 0.0030(9) 0.0019(12) -0.0019(11)
N33 0.0209(13) 0.0599(15) 0.0338(14) 0.0271(12) -0.0047(12) -0.0136(11)
N41 0.0313(13) 0.0153(11) 0.0310(14) -0.0005(9) -0.0020(11) -0.0007(9)
C41 0.0274(16) 0.0158(13) 0.0198(14) -0.0036(10) -0.0006(12) 0.0046(11)
N42 0.0375(14) 0.0153(11) 0.0374(14) 0.0007(10) 0.0043(13) -0.0019(10)
C42 0.0173(14) 0.0197(13) 0.0212(14) 0.0030(10) 0.0012(11) -0.0005(11)
N43 0.0364(15) 0.0154(11) 0.0378(15) -0.0026(10) 0.0133(12) -0.0041(10)
N51 0.0277(14) 0.0335(13) 0.0330(15) 0.0009(10) -0.0045(12) -0.0013(11)
C51 0.0298(17) 0.0223(14) 0.0190(14) 0.0024(10) -0.0010(12) 0.0000(12)
N52 0.0221(12) 0.0289(12) 0.0202(12) -0.0015(9) -0.0015(10) 0.0032(11)
C52 0.0199(15) 0.0256(13) 0.0130(13) 0.0032(10) 0.0027(11) 0.0099(12)
N53 0.0215(13) 0.0251(12) 0.0393(15) -0.0011(10) 0.0004(11) 0.0016(10)
N61 0.0435(16) 0.0180(11) 0.0333(15) -0.0025(9) 0.0069(13) -0.0050(10)
C61 0.0331(16) 0.0130(12) 0.0234(15) -0.0028(10) 0.0067(13) 0.0050(11)
N62 0.0230(12) 0.0147(10) 0.0315(13) 0.0005(9) 0.0051(11) -0.0004(9)
C62 0.0170(13) 0.0203(13) 0.0263(15) 0.0017(11) 0.0052(12) -0.0022(10)
N63 0.0344(14) 0.0118(10) 0.0483(16) -0.0050(10) 0.0168(12) -0.0035(10)
P1 0.0173(3) 0.0169(3) 0.0149(3) 0.0020(3) -0.0032(3) -0.0007(3)
C111 0.0165(14) 0.0189(12) 0.0115(12) -0.0005(9) -0.0025(11) 0.0006(11)
C112 0.0153(14) 0.0215(12) 0.0240(14) 0.0048(10) 0.0008(12) 0.0009(11)
C113 0.0230(16) 0.0220(13) 0.0255(15) 0.0097(11) 0.0007(12) 0.0041(11)
C114 0.0139(14) 0.0309(14) 0.0252(15) 0.0015(11) -0.0062(12) 0.0041(12)
C115 0.0190(15) 0.0269(14) 0.0346(17) 0.0023(11) -0.0062(13) -0.0063(12)
C116 0.0246(16) 0.0177(13) 0.0229(14) 0.0021(10) -0.0018(12) 0.0007(11)
C121 0.0196(14) 0.0242(13) 0.0136(13) 0.0022(10) -0.0012(11) -0.0015(11)
C122 0.0244(16) 0.0309(14) 0.0234(16) -0.0007(11) -0.0012(12) -0.0032(12)
C123 0.0197(16) 0.0473(18) 0.0326(17) 0.0015(13) -0.0065(14) -0.0124(14)
C124 0.0418(19) 0.0331(15) 0.0277(17) -0.0043(13) -0.0091(15) -0.0132(14)
C125 0.043(2) 0.0267(14) 0.0287(17) -0.0060(12) -0.0067(15) -0.0007(13)
C126 0.0217(15) 0.0239(13) 0.0262(15) -0.0035(11) -0.0015(12) 0.0000(12)
C131 0.0175(14) 0.0179(12) 0.0169(13) -0.0032(10) -0.0026(11) -0.0001(10)
C132 0.0386(19) 0.0338(16) 0.0218(15) -0.0021(11) -0.0101(14) 0.0123(14)
C133 0.0366(19) 0.0315(15) 0.0364(19) -0.0022(13) -0.0057(15) 0.0155(14)
C134 0.041(2) 0.0311(16) 0.0350(18) -0.0130(13) 0.0052(15) 0.0058(14)
C135 0.0427(19) 0.0309(14) 0.0226(15) -0.0035(12) 0.0002(13) 0.0041(15)
C136 0.0310(17) 0.0219(13) 0.0219(15) 0.0030(10) -0.0010(13) 0.0030(12)
C140 0.0237(14) 0.0236(12) 0.0168(14) 0.0044(10) -0.0030(12) -0.0030(11)
P2 0.0190(4) 0.0186(3) 0.0200(3) 0.0038(3) 0.0036(3) 0.0004(3)
C211 0.0169(13) 0.0203(12) 0.0203(13) 0.0055(10) 0.0001(12) 0.0011(10)
C212 0.0209(15) 0.0249(13) 0.0221(15) 0.0025(11) 0.0040(12) 0.0041(11)
C213 0.0189(15) 0.0215(13) 0.0305(16) 0.0012(11) -0.0028(12) 0.0018(11)
C214 0.0158(14) 0.0250(13) 0.0372(17) 0.0114(12) -0.0009(13) -0.0005(11)
C215 0.0218(15) 0.0388(15) 0.0262(16) 0.0119(12) 0.0056(13) 0.0026(13)
C216 0.0264(16) 0.0281(13) 0.0184(14) 0.0048(10) -0.0012(13) 0.0010(12)
C221 0.0188(15) 0.0248(13) 0.0149(13) -0.0023(10) 0.0002(11) 0.0025(11)
C222 0.0260(16) 0.0354(14) 0.0219(16) -0.0012(12) 0.0037(13) 0.0015(12)
C223 0.0214(16) 0.0572(19) 0.0306(17) -0.0104(14) -0.0020(14) 0.0046(15)
C224 0.0343(19) 0.0507(18) 0.0208(15) -0.0026(13) -0.0002(14) 0.0213(16)
C225 0.0399(19) 0.0326(15) 0.0249(16) 0.0048(12) 0.0070(14) 0.0123(14)
C226 0.0301(16) 0.0275(13) 0.0212(15) 0.0024(12) 0.0021(13) 0.0010(12)
C231 0.0147(13) 0.0236(13) 0.0190(14) 0.0035(10) 0.0020(11) 0.0006(11)
C232 0.0326(17) 0.0227(14) 0.0258(16) 0.0039(11) 0.0027(13) -0.0013(12)
C233 0.049(2) 0.0309(15) 0.0235(16) 0.0124(12) 0.0010(15) -0.0028(14)
C234 0.0329(18) 0.0382(16) 0.0174(15) 0.0047(11) 0.0032(13) -0.0006(13)
C235 0.0255(16) 0.0349(15) 0.0240(16) -0.0008(11) 0.0023(13) 0.0076(13)
C236 0.0227(16) 0.0270(13) 0.0233(15) 0.0086(11) 0.0024(12) 0.0060(12)
C240 0.0294(17) 0.0207(13) 0.0371(17) 0.0000(11) 0.0080(14) -0.0001(12)
 
_geom_special_details
;
 All esds (except the esd in the dihedral angle between two l.s. planes)
 are estimated using the full covariance matrix.  The cell esds are taken
 into account individually in the estimation of esds in distances, angles
 and torsion angles; correlations between esds in cell parameters are only
 used when they are defined by crystal symmetry.  An approximate (isotropic)
 treatment of cell esds is used for estimating esds involving l.s. planes.
;
 
loop_
 _geom_bond_atom_site_label_1
 _geom_bond_atom_site_label_2
 _geom_bond_distance
 _geom_bond_site_symmetry_2
 _geom_bond_publ_flag
Fe1 N62 2.1148(18) 3_545 ?
Fe1 N41 2.1439(19) . ?
Fe1 N11 2.147(2) . ?
Fe1 N32 2.170(2) 4_455 ?
Fe1 N21 2.186(2) . ?
Fe1 N31 2.188(2) . ?
Fe2 N42 2.1189(19) 3_545 ?
Fe2 N61 2.1312(19) . ?
Fe2 N22 2.160(2) . ?
Fe2 N51 2.165(2) . ?
Fe2 N12 2.169(2) . ?
Fe2 N52 2.214(2) 4_456 ?
N11 C11 1.141(3) . ?
C11 N13 1.317(3) . ?
N12 C12 1.146(3) . ?
C12 N13 1.315(3) . ?
N21 C21 1.146(3) . ?
C21 N23 1.315(3) . ?
N22 C22 1.151(3) . ?
C22 N23 1.315(3) . ?
N31 C31 1.147(3) . ?
C31 N33 1.298(3) . ?
N32 C32 1.152(3) . ?
N32 Fe1 2.170(2) 4 ?
C32 N33 1.306(3) . ?
N41 C41 1.148(3) . ?
C41 N43 1.305(3) . ?
N42 C42 1.147(3) . ?
N42 Fe2 2.1189(19) 3 ?
C42 N43 1.302(3) . ?
N51 C51 1.156(3) . ?
C51 N53 1.307(3) . ?
N52 C52 1.157(3) . ?
N52 Fe2 2.214(2) 4_556 ?
C52 N53 1.306(3) . ?
N61 C61 1.144(3) . ?
C61 N63 1.306(3) . ?
N62 C62 1.151(3) . ?
N62 Fe1 2.1148(18) 3 ?
C62 N63 1.304(3) . ?
P1 C140 1.787(2) . ?
P1 C111 1.788(2) . ?
P1 C131 1.793(2) . ?
P1 C121 1.800(2) . ?
C111 C116 1.389(3) . ?
C111 C112 1.399(3) . ?
C112 C113 1.374(3) . ?
C113 C114 1.375(3) . ?
C114 C115 1.395(3) . ?
C115 C116 1.378(3) . ?
C121 C122 1.388(3) . ?
C121 C126 1.398(3) . ?
C122 C123 1.388(3) . ?
C123 C124 1.380(4) . ?
C124 C125 1.382(4) . ?
C125 C126 1.391(3) . ?
C131 C136 1.385(3) . ?
C131 C132 1.397(3) . ?
C132 C133 1.389(4) . ?
C133 C134 1.378(4) . ?
C134 C135 1.381(4) . ?
C135 C136 1.384(4) . ?
P2 C231 1.785(3) . ?
P2 C211 1.791(3) . ?
P2 C221 1.793(3) . ?
P2 C240 1.796(2) . ?
C211 C212 1.391(3) . ?
C211 C216 1.395(3) . ?
C212 C213 1.382(4) . ?
C213 C214 1.378(4) . ?
C214 C215 1.385(4) . ?
C215 C216 1.388(4) . ?
C221 C226 1.384(3) . ?
C221 C222 1.400(4) . ?
C222 C223 1.377(4) . ?
C223 C224 1.387(4) . ?
C224 C225 1.378(4) . ?
C225 C226 1.390(4) . ?
C231 C232 1.397(3) . ?
C231 C236 1.403(3) . ?
C232 C233 1.361(4) . ?
C233 C234 1.390(4) . ?
C234 C235 1.379(3) . ?
C235 C236 1.385(3) . ?
 
loop_
 _geom_angle_atom_site_label_1
 _geom_angle_atom_site_label_2
 _geom_angle_atom_site_label_3
 _geom_angle
 _geom_angle_site_symmetry_1
 _geom_angle_site_symmetry_3
 _geom_angle_publ_flag
N62 Fe1 N41 173.26(9) 3_545 . ?
N62 Fe1 N11 94.39(8) 3_545 . ?
N41 Fe1 N11 91.77(8) . . ?
N62 Fe1 N32 91.38(8) 3_545 4_455 ?
N41 Fe1 N32 92.01(8) . 4_455 ?
N11 Fe1 N32 83.78(8) . 4_455 ?
N62 Fe1 N21 89.99(8) 3_545 . ?
N41 Fe1 N21 87.77(8) . . ?
N11 Fe1 N21 85.35(8) . . ?
N32 Fe1 N21 169.12(8) 4_455 . ?
N62 Fe1 N31 89.34(8) 3_545 . ?
N41 Fe1 N31 84.41(8) . . ?
N11 Fe1 N31 175.78(8) . . ?
N32 Fe1 N31 98.11(8) 4_455 . ?
N21 Fe1 N31 92.70(8) . . ?
N42 Fe2 N61 176.82(9) 3_545 . ?
N42 Fe2 N22 92.47(8) 3_545 . ?
N61 Fe2 N22 88.50(8) . . ?
N42 Fe2 N51 88.51(9) 3_545 . ?
N61 Fe2 N51 88.43(9) . . ?
N22 Fe2 N51 91.59(9) . . ?
N42 Fe2 N12 91.64(8) 3_545 . ?
N61 Fe2 N12 91.43(8) . . ?
N22 Fe2 N12 87.37(8) . . ?
N51 Fe2 N12 178.95(9) . . ?
N42 Fe2 N52 90.50(8) 3_545 4_456 ?
N61 Fe2 N52 88.79(8) . 4_456 ?
N22 Fe2 N52 174.22(8) . 4_456 ?
N51 Fe2 N52 93.45(9) . 4_456 ?
N12 Fe2 N52 87.59(8) . 4_456 ?
C11 N11 Fe1 175.1(2) . . ?
N11 C11 N13 174.6(3) . . ?
C12 N12 Fe2 152.4(2) . . ?
N12 C12 N13 174.4(3) . . ?
C12 N13 C11 116.5(2) . . ?
C21 N21 Fe1 152.4(2) . . ?
N21 C21 N23 174.9(3) . . ?
C22 N22 Fe2 170.2(2) . . ?
N22 C22 N23 174.5(3) . . ?
C22 N23 C21 118.8(2) . . ?
C31 N31 Fe1 134.60(19) . . ?
N31 C31 N33 173.9(3) . . ?
C32 N32 Fe1 155.0(2) . 4 ?
N32 C32 N33 175.2(3) . . ?
C31 N33 C32 120.9(2) . . ?
C41 N41 Fe1 156.1(2) . . ?
N41 C41 N43 172.8(3) . . ?
C42 N42 Fe2 168.7(2) . 3 ?
N42 C42 N43 171.3(3) . . ?
C42 N43 C41 123.6(2) . . ?
C51 N51 Fe2 156.0(2) . . ?
N51 C51 N53 174.4(3) . . ?
C52 N52 Fe2 126.74(19) . 4_556 ?
N52 C52 N53 172.5(3) . . ?
C52 N53 C51 121.2(2) . . ?
C61 N61 Fe2 157.1(2) . . ?
N61 C61 N63 172.6(3) . . ?
C62 N62 Fe1 165.7(2) . 3 ?
N62 C62 N63 171.3(3) . . ?
C62 N63 C61 123.5(2) . . ?
C140 P1 C111 110.83(12) . . ?
C140 P1 C131 109.46(11) . . ?
C111 P1 C131 108.63(11) . . ?
C140 P1 C121 106.71(11) . . ?
C111 P1 C121 110.08(11) . . ?
C131 P1 C121 111.14(12) . . ?
C116 C111 C112 119.6(2) . . ?
C116 C111 P1 120.03(17) . . ?
C112 C111 P1 120.23(19) . . ?
C113 C112 C111 119.8(2) . . ?
C112 C113 C114 120.5(2) . . ?
C113 C114 C115 120.3(2) . . ?
C116 C115 C114 119.5(2) . . ?
C115 C116 C111 120.3(2) . . ?
C122 C121 C126 120.4(2) . . ?
C122 C121 P1 121.0(2) . . ?
C126 C121 P1 118.4(2) . . ?
C123 C122 C121 119.8(3) . . ?
C124 C123 C122 119.8(3) . . ?
C123 C124 C125 121.0(3) . . ?
C124 C125 C126 119.8(3) . . ?
C125 C126 C121 119.3(3) . . ?
C136 C131 C132 119.7(2) . . ?
C136 C131 P1 120.15(19) . . ?
C132 C131 P1 120.1(2) . . ?
C133 C132 C131 119.5(3) . . ?
C134 C133 C132 120.4(3) . . ?
C133 C134 C135 120.1(3) . . ?
C134 C135 C136 120.2(3) . . ?
C135 C136 C131 120.2(2) . . ?
C231 P2 C211 107.50(12) . . ?
C231 P2 C221 109.24(11) . . ?
C211 P2 C221 109.58(11) . . ?
C231 P2 C240 112.19(12) . . ?
C211 P2 C240 109.24(12) . . ?
C221 P2 C240 109.04(13) . . ?
C212 C211 C216 120.0(2) . . ?
C212 C211 P2 120.98(19) . . ?
C216 C211 P2 119.01(19) . . ?
C213 C212 C211 120.2(2) . . ?
C214 C213 C212 119.7(3) . . ?
C213 C214 C215 120.8(2) . . ?
C214 C215 C216 119.9(3) . . ?
C215 C216 C211 119.4(2) . . ?
C226 C221 C222 119.7(2) . . ?
C226 C221 P2 121.7(2) . . ?
C222 C221 P2 118.51(19) . . ?
C223 C222 C221 120.0(3) . . ?
C222 C223 C224 120.2(3) . . ?
C225 C224 C223 119.9(3) . . ?
C224 C225 C226 120.5(3) . . ?
C221 C226 C225 119.7(3) . . ?
C232 C231 C236 119.1(2) . . ?
C232 C231 P2 122.35(19) . . ?
C236 C231 P2 118.26(18) . . ?
C233 C232 C231 120.4(2) . . ?
C232 C233 C234 120.7(2) . . ?
C235 C234 C233 119.7(2) . . ?
C234 C235 C236 120.4(2) . . ?
C235 C236 C231 119.7(2) . . ?
 
_diffrn_measured_fraction_theta_max    0.963
_diffrn_reflns_theta_full              32.02
_diffrn_measured_fraction_theta_full   0.963
_refine_diff_density_max    0.583
_refine_diff_density_min   -0.417
_refine_diff_density_rms    0.086

_publ_contact_author
;
    Dr. S.R. Batten
    School of Chemistry
    Monash University 3800
    AUSTRALIA
;

_publ_contact_author_phone            ' +61 3 9905 4606 '
_publ_contact_author_fax              ' +61 3 9905 4597 '
_publ_contact_author_email            ' 
stuart.batten@sci.monash.edu.au '

loop_
_publ_author_name
_publ_author_address
'van der Werff, Patricia M.' 
; 
School of Chemistry
Monash University 3800
AUSTRALIA
;
'Batten, Stuart R.' 
; 
School of Chemistry
Monash University 3800
Australia
;
'Jensen, Paul' 
; 
Department of Chemistry
Trinity College
Dublin 2
Ireland
;
'Moubaraki, Boujemaa' 
; 
School of Chemistry
Monash University 3800
Australia
;
'Murray, Keith S.' 
; 
School of Chemistry
Monash University 3800
Australia
;
'Cashion, John D.' 
; 
School of Physics and Materials Engineering
Monash University 3800
Australia
;

_publ_section_title
;
 Structure and magnetism of 3D anionic metal dicyanamide
 (MePh3P)[M(dca)3] (M = Fe, Co, Ni) and (EtPh3P)[M(dca)3]
 (M = Mn, Co, Ni) networks
;


#=END


data_MeCo
 
_audit_creation_method            SHELXL-97
_chemical_name_systematic
;
 Methyltriphenylphosphonium tris(dicyanamido)cobaltate(II)
;
_chemical_name_common             ?
_chemical_melting_point           ?
_chemical_formula_moiety          ?
_chemical_formula_sum
 'C25 H18 Co N9 P'
_chemical_formula_weight          534.38
 
loop_
 _atom_type_symbol
 _atom_type_description
 _atom_type_scat_dispersion_real
 _atom_type_scat_dispersion_imag
 _atom_type_scat_source
 'C'  'C'   0.0033   0.0016
 'International Tables Vol C Tables 4.2.6.8 and 6.1.1.4'
 'H'  'H'   0.0000   0.0000
 'International Tables Vol C Tables 4.2.6.8 and 6.1.1.4'
 'N'  'N'   0.0061   0.0033
 'International Tables Vol C Tables 4.2.6.8 and 6.1.1.4'
 'P'  'P'   0.1023   0.0942
 'International Tables Vol C Tables 4.2.6.8 and 6.1.1.4'
 'Co'  'Co'   0.3494   0.9721
 'International Tables Vol C Tables 4.2.6.8 and 6.1.1.4'
 
_symmetry_cell_setting            Orthorhombic
_symmetry_space_group_name_H-M    P2(1)2(1)2(1)
 
loop_
 _symmetry_equiv_pos_as_xyz
 'x, y, z'
 '-x+1/2, -y, z+1/2'
 '-x, y+1/2, -z+1/2'
 'x+1/2, -y+1/2, -z'
 
_cell_length_a                    13.8718(2)
_cell_length_b                    16.9489(2)
_cell_length_c                    20.7720(3)
_cell_angle_alpha                 90.00
_cell_angle_beta                  90.00
_cell_angle_gamma                 90.00
_cell_volume                      4883.74(12)
_cell_formula_units_Z             8
_cell_measurement_temperature     123(2)
_cell_measurement_reflns_used     ?
_cell_measurement_theta_min       ?
_cell_measurement_theta_max       ?
 
_exptl_crystal_description        plate
_exptl_crystal_colour             purple
_exptl_crystal_size_max           0.50
_exptl_crystal_size_mid           0.38
_exptl_crystal_size_min           0.18
_exptl_crystal_density_meas       ?
_exptl_crystal_density_diffrn     1.454
_exptl_crystal_density_method     'not measured'
_exptl_crystal_F_000              2184
_exptl_absorpt_coefficient_mu     0.802
_exptl_absorpt_correction_type    'face-indexed'
_exptl_absorpt_correction_T_min   0.6645
_exptl_absorpt_correction_T_max   0.8620
_exptl_absorpt_process_details    ?
 
_exptl_special_details
;
 ?
;
 
_diffrn_ambient_temperature       123(2)
_diffrn_radiation_wavelength      0.71073
_diffrn_radiation_type            MoK\a
_diffrn_radiation_source          'fine-focus sealed tube'
_diffrn_radiation_monochromator   graphite
_diffrn_measurement_device_type   ?
_diffrn_measurement_method        '\w scans'
_diffrn_detector_area_resol_mean  ?
_diffrn_standards_number          ?
_diffrn_standards_interval_count  ?
_diffrn_standards_interval_time   ?
_diffrn_standards_decay_%         ?
_diffrn_reflns_number             76560
_diffrn_reflns_av_R_equivalents   0.0521
_diffrn_reflns_av_sigmaI/netI     0.0591
_diffrn_reflns_limit_h_min        -19
_diffrn_reflns_limit_h_max        17
_diffrn_reflns_limit_k_min        -25
_diffrn_reflns_limit_k_max        25
_diffrn_reflns_limit_l_min        -30
_diffrn_reflns_limit_l_max        30
_diffrn_reflns_theta_min          2.40
_diffrn_reflns_theta_max          32.06
_reflns_number_total              16521
_reflns_number_gt                 13171
_reflns_threshold_expression      >2sigma(I)
 
_computing_data_collection        'Siemens XSCANS'
_computing_cell_refinement        'Siemens XSCANS'
_computing_data_reduction         'Siemens SHELXTL'
_computing_structure_solution     'SHELXS-97 (Sheldrick, 1990)'
_computing_structure_refinement   'SHELXL-97 (Sheldrick, 1997)'
_computing_molecular_graphics     'Siemens SHELXTL'
_computing_publication_material   'Siemens SHELXTL'
 
_refine_special_details
;
 Refinement of F^2^ against ALL reflections.  The weighted R-factor wR and
 goodness of fit S are based on F^2^, conventional R-factors R are based
 on F, with F set to zero for negative F^2^. The threshold expression of
 F^2^ > 2sigma(F^2^) is used only for calculating R-factors(gt) etc. and is
 not relevant to the choice of reflections for refinement.  R-factors based
 on F^2^ are statistically about twice as large as those based on F, and R-
 factors based on ALL data will be even larger.
;
 
_refine_ls_structure_factor_coef  Fsqd
_refine_ls_matrix_type            full
_refine_ls_weighting_scheme       calc
_refine_ls_weighting_details
 'calc w=1/[\s^2^(Fo^2^)+(0.0202P)^2^+1.5621P] where P=(Fo^2^+2Fc^2^)/3'
_atom_sites_solution_primary      direct
_atom_sites_solution_secondary    difmap
_atom_sites_solution_hydrogens    geom
_refine_ls_hydrogen_treatment     mixed
_refine_ls_extinction_method      none
_refine_ls_extinction_coef        ?
_refine_ls_abs_structure_details
 'Flack H D (1983), Acta Cryst. A39, 876-881'
_refine_ls_abs_structure_Flack    -0.003(6)
_refine_ls_number_reflns          16521
_refine_ls_number_parameters      649
_refine_ls_number_restraints      0
_refine_ls_R_factor_all           0.0658
_refine_ls_R_factor_gt            0.0387
_refine_ls_wR_factor_ref          0.0670
_refine_ls_wR_factor_gt           0.0609
_refine_ls_goodness_of_fit_ref    1.023
_refine_ls_restrained_S_all       1.023
_refine_ls_shift/su_max           0.001
_refine_ls_shift/su_mean          0.000
 
loop_
 _atom_site_label
 _atom_site_type_symbol
 _atom_site_fract_x
 _atom_site_fract_y
 _atom_site_fract_z
 _atom_site_U_iso_or_equiv
 _atom_site_adp_type
 _atom_site_occupancy
 _atom_site_symmetry_multiplicity
 _atom_site_calc_flag
 _atom_site_refinement_flags
 _atom_site_disorder_assembly
 _atom_site_disorder_group
Co1 Co -0.121661(16) 0.201710(13) 0.076078(10) 0.01276(5) Uani 1 1 d . . .
Co2 Co 0.036339(16) 0.201050(13) 0.415224(11) 0.01521(5) Uani 1 1 d . . .
N11 N -0.17174(11) 0.20764(10) 0.17182(7) 0.0209(3) Uani 1 1 d . . .
C11 C -0.19133(12) 0.21121(11) 0.22518(9) 0.0185(4) Uani 1 1 d . . .
N12 N -0.10228(12) 0.21431(10) 0.37269(8) 0.0261(4) Uani 1 1 d . . .
C12 C -0.15499(13) 0.21351(11) 0.33012(9) 0.0204(4) Uani 1 1 d . . .
N13 N -0.22156(12) 0.21329(12) 0.28531(8) 0.0344(5) Uani 1 1 d . . .
N21 N 0.01984(11) 0.18998(9) 0.11723(7) 0.0200(3) Uani 1 1 d . . .
C21 C 0.07155(12) 0.18454(9) 0.16063(9) 0.0156(3) Uani 1 1 d . . .
N22 N 0.09376(12) 0.19317(10) 0.32035(8) 0.0240(3) Uani 1 1 d . . .
C22 C 0.10968(13) 0.18749(10) 0.26620(9) 0.0190(4) Uani 1 1 d . . .
N23 N 0.13659(12) 0.17875(10) 0.20582(8) 0.0240(4) Uani 1 1 d . . .
N31 N -0.06562(11) 0.20206(10) -0.02045(7) 0.0213(3) Uani 1 1 d . . .
C31 C -0.00456(13) 0.23561(11) -0.04606(8) 0.0179(4) Uani 1 1 d . . .
N32 N 0.22928(11) 0.28526(8) -0.05252(7) 0.0178(3) Uani 1 1 d . . .
C32 C 0.14809(14) 0.27887(10) -0.06298(8) 0.0183(4) Uani 1 1 d . . .
N33 N 0.05720(12) 0.27585(11) -0.07969(9) 0.0352(4) Uani 1 1 d . . .
N41 N -0.09886(11) 0.32476(8) 0.07251(8) 0.0229(3) Uani 1 1 d . . .
C41 C -0.05762(14) 0.38198(10) 0.06200(9) 0.0194(4) Uani 1 1 d . . .
N42 N -0.01878(12) 0.57890(9) 0.07904(9) 0.0258(4) Uani 1 1 d . . .
C42 C -0.01671(13) 0.51338(10) 0.06583(9) 0.0181(4) Uani 1 1 d . . .
N43 N -0.00265(13) 0.44145(9) 0.04590(8) 0.0281(4) Uani 1 1 d . . .
N51 N 0.17633(12) 0.18800(10) 0.45557(8) 0.0278(4) Uani 1 1 d . . .
C51 C 0.25949(14) 0.18812(11) 0.45760(9) 0.0217(4) Uani 1 1 d . . .
N52 N 0.46675(11) 0.28484(9) 0.49111(7) 0.0217(3) Uani 1 1 d . . .
C52 C 0.40878(13) 0.23878(11) 0.47637(8) 0.0185(4) Uani 1 1 d . . .
N53 N 0.35342(12) 0.18113(9) 0.45740(8) 0.0261(4) Uani 1 1 d . . .
N61 N 0.06062(12) 0.32307(9) 0.41298(8) 0.0267(4) Uani 1 1 d . . .
C61 C 0.10402(14) 0.38062(10) 0.40954(9) 0.0212(4) Uani 1 1 d . . .
N62 N 0.13338(11) 0.57887(8) 0.42805(8) 0.0212(3) Uani 1 1 d . . .
C62 C 0.14069(13) 0.51267(10) 0.41801(9) 0.0194(4) Uani 1 1 d . . .
N63 N 0.16293(12) 0.43986(9) 0.40346(9) 0.0307(4) Uani 1 1 d . . .
P1 P 0.26248(3) 0.59846(3) 0.65851(2) 0.01527(9) Uani 1 1 d . . .
C111 C 0.36720(13) 0.56337(10) 0.69976(8) 0.0150(3) Uani 1 1 d . . .
C112 C 0.36460(13) 0.49232(10) 0.73346(9) 0.0190(4) Uani 1 1 d . . .
H11A H 0.3083 0.4604 0.7322 0.023 Uiso 1 1 calc R . .
C113 C 0.44383(14) 0.46831(11) 0.76870(9) 0.0229(4) Uani 1 1 d . . .
H11B H 0.4420 0.4199 0.7918 0.027 Uiso 1 1 calc R . .
C114 C 0.52534(14) 0.51445(12) 0.77036(9) 0.0238(4) Uani 1 1 d . . .
H11C H 0.5795 0.4978 0.7948 0.029 Uiso 1 1 calc R . .
C115 C 0.52911(14) 0.58520(12) 0.73656(10) 0.0262(4) Uani 1 1 d . . .
H11D H 0.5859 0.6164 0.7377 0.031 Uiso 1 1 calc R . .
C116 C 0.45039(13) 0.61002(11) 0.70143(9) 0.0213(4) Uani 1 1 d . . .
H11E H 0.4526 0.6585 0.6785 0.026 Uiso 1 1 calc R . .
C121 C 0.19348(13) 0.51631(11) 0.62916(8) 0.0184(4) Uani 1 1 d . . .
C122 C 0.09308(14) 0.51705(13) 0.63179(10) 0.0255(4) Uani 1 1 d . . .
H12A H 0.0602 0.5592 0.6525 0.031 Uiso 1 1 calc R . .
C123 C 0.04161(15) 0.45565(13) 0.60391(10) 0.0323(5) Uani 1 1 d . . .
H12B H -0.0268 0.4558 0.6055 0.039 Uiso 1 1 calc R . .
C124 C 0.08912(16) 0.39470(13) 0.57398(11) 0.0331(5) Uani 1 1 d . . .
H12C H 0.0534 0.3530 0.5550 0.040 Uiso 1 1 calc R . .
C125 C 0.18914(16) 0.39382(12) 0.57135(10) 0.0320(5) Uani 1 1 d . . .
H12D H 0.2215 0.3514 0.5508 0.038 Uiso 1 1 calc R . .
C126 C 0.24179(15) 0.45465(11) 0.59863(9) 0.0241(4) Uani 1 1 d . . .
H12E H 0.3102 0.4544 0.5966 0.029 Uiso 1 1 calc R . .
C131 C 0.19329(13) 0.65790(10) 0.71307(9) 0.0181(4) Uani 1 1 d . . .
C132 C 0.13345(16) 0.71725(12) 0.68954(10) 0.0303(5) Uani 1 1 d . . .
H13A H 0.1271 0.7250 0.6444 0.036 Uiso 1 1 calc R . .
C133 C 0.08325(17) 0.76491(13) 0.73197(11) 0.0360(5) Uani 1 1 d . . .
H13B H 0.0417 0.8049 0.7160 0.043 Uiso 1 1 calc R . .
C134 C 0.09335(16) 0.75447(13) 0.79743(11) 0.0331(5) Uani 1 1 d . . .
H13C H 0.0600 0.7882 0.8264 0.040 Uiso 1 1 calc R . .
C135 C 0.15217(16) 0.69483(13) 0.82125(10) 0.0314(5) Uani 1 1 d . . .
H13D H 0.1581 0.6872 0.8664 0.038 Uiso 1 1 calc R . .
C136 C 0.20190(15) 0.64666(11) 0.77922(9) 0.0231(4) Uani 1 1 d . . .
H13E H 0.2420 0.6058 0.7954 0.028 Uiso 1 1 calc R . .
C140 C 0.29525(14) 0.65626(11) 0.58993(9) 0.0214(4) Uani 1 1 d . . .
H14A H 0.3336 0.7017 0.6039 0.032 Uiso 1 1 calc R . .
H14B H 0.2368 0.6748 0.5682 0.032 Uiso 1 1 calc R . .
H14C H 0.3333 0.6239 0.5602 0.032 Uiso 1 1 calc R . .
P2 P 0.35949(3) -0.06247(3) 0.15828(2) 0.01761(9) Uani 1 1 d . . .
C211 C 0.47595(13) -0.01684(10) 0.15626(9) 0.0191(4) Uani 1 1 d . . .
C212 C 0.51042(14) 0.02489(11) 0.20938(9) 0.0218(4) Uani 1 1 d . . .
H21A H 0.4731 0.0277 0.2477 0.026 Uiso 1 1 calc R . .
C213 C 0.59913(14) 0.06220(11) 0.20622(10) 0.0244(4) Uani 1 1 d . . .
H21B H 0.6227 0.0910 0.2421 0.029 Uiso 1 1 calc R . .
C214 C 0.65315(14) 0.05715(11) 0.15027(10) 0.0244(4) Uani 1 1 d . . .
H21C H 0.7140 0.0827 0.1480 0.029 Uiso 1 1 calc R . .
C215 C 0.61953(15) 0.01530(12) 0.09775(10) 0.0275(4) Uani 1 1 d . . .
H21D H 0.6573 0.0125 0.0597 0.033 Uiso 1 1 calc R . .
C216 C 0.53113(14) -0.02252(11) 0.10034(9) 0.0232(4) Uani 1 1 d . . .
H21E H 0.5084 -0.0519 0.0645 0.028 Uiso 1 1 calc R . .
C221 C 0.27945(13) -0.01174(11) 0.10470(8) 0.0192(4) Uani 1 1 d . . .
C222 C 0.19161(14) -0.04742(12) 0.08829(10) 0.0270(4) Uani 1 1 d . . .
H22A H 0.1768 -0.0989 0.1034 0.032 Uiso 1 1 calc R . .
C223 C 0.12693(16) -0.00723(14) 0.05013(10) 0.0339(5) Uani 1 1 d . . .
H22B H 0.0675 -0.0313 0.0388 0.041 Uiso 1 1 calc R . .
C224 C 0.14789(16) 0.06777(14) 0.02827(10) 0.0345(5) Uani 1 1 d . . .
H22C H 0.1023 0.0954 0.0026 0.041 Uiso 1 1 calc R . .
C225 C 0.23447(16) 0.10273(13) 0.04343(10) 0.0310(5) Uani 1 1 d . . .
H22D H 0.2487 0.1541 0.0278 0.037 Uiso 1 1 calc R . .
C226 C 0.30120(14) 0.06301(11) 0.08153(9) 0.0244(4) Uani 1 1 d . . .
H22E H 0.3613 0.0869 0.0916 0.029 Uiso 1 1 calc R . .
C231 C 0.31441(13) -0.05367(11) 0.23892(9) 0.0183(4) Uani 1 1 d . . .
C232 C 0.32511(15) -0.11442(11) 0.28358(10) 0.0257(4) Uani 1 1 d . . .
H23A H 0.3513 -0.1638 0.2708 0.031 Uiso 1 1 calc R . .
C233 C 0.29724(16) -0.10220(13) 0.34648(10) 0.0319(5) Uani 1 1 d . . .
H23B H 0.3031 -0.1438 0.3769 0.038 Uiso 1 1 calc R . .
C234 C 0.26083(15) -0.03008(12) 0.36585(9) 0.0269(4) Uani 1 1 d . . .
H23C H 0.2432 -0.0221 0.4095 0.032 Uiso 1 1 calc R . .
C235 C 0.25006(15) 0.03043(13) 0.32188(9) 0.0270(4) Uani 1 1 d . . .
H23D H 0.2246 0.0798 0.3353 0.032 Uiso 1 1 calc R . .
C236 C 0.27649(13) 0.01897(12) 0.25812(9) 0.0222(4) Uani 1 1 d . . .
H23E H 0.2688 0.0603 0.2277 0.027 Uiso 1 1 calc R . .
C240 C 0.37015(16) -0.16328(11) 0.13336(10) 0.0262(4) Uani 1 1 d . . .
H24A H 0.4141 -0.1912 0.1625 0.039 Uiso 1 1 calc R . .
H24B H 0.3957 -0.1654 0.0894 0.039 Uiso 1 1 calc R . .
H24C H 0.3066 -0.1884 0.1346 0.039 Uiso 1 1 calc R . .
 
loop_
 _atom_site_aniso_label
 _atom_site_aniso_U_11
 _atom_site_aniso_U_22
 _atom_site_aniso_U_33
 _atom_site_aniso_U_23
 _atom_site_aniso_U_13
 _atom_site_aniso_U_12
Co1 0.01375(11) 0.01028(9) 0.01425(10) 0.00054(9) -0.00014(9) -0.00043(9)
Co2 0.01774(12) 0.01101(10) 0.01687(11) -0.00051(10) -0.00071(9) -0.00124(9)
N11 0.0194(8) 0.0267(8) 0.0167(7) -0.0003(7) -0.0008(6) 0.0030(7)
C11 0.0132(9) 0.0212(9) 0.0211(9) -0.0003(7) -0.0030(7) 0.0044(7)
N12 0.0259(9) 0.0305(9) 0.0220(8) 0.0002(7) -0.0020(7) -0.0009(7)
C12 0.0200(9) 0.0242(10) 0.0168(8) -0.0005(7) 0.0049(7) 0.0059(7)
N13 0.0199(9) 0.0668(14) 0.0164(8) 0.0005(8) 0.0011(7) 0.0142(9)
N21 0.0181(8) 0.0209(8) 0.0209(7) -0.0007(6) -0.0002(6) 0.0015(6)
C21 0.0134(8) 0.0135(8) 0.0200(8) 0.0004(6) 0.0063(7) -0.0002(6)
N22 0.0260(9) 0.0245(8) 0.0213(8) -0.0007(7) 0.0000(7) -0.0002(7)
C22 0.0136(9) 0.0186(9) 0.0248(9) 0.0013(7) -0.0033(7) 0.0011(7)
N23 0.0148(8) 0.0376(10) 0.0196(8) 0.0008(7) -0.0015(7) 0.0033(7)
N31 0.0185(8) 0.0279(8) 0.0175(7) 0.0018(7) 0.0006(6) -0.0023(7)
C31 0.0166(9) 0.0224(9) 0.0147(8) 0.0018(7) -0.0037(7) 0.0011(7)
N32 0.0186(8) 0.0181(8) 0.0168(7) -0.0010(6) 0.0013(6) -0.0018(6)
C32 0.0210(10) 0.0186(8) 0.0154(8) 0.0033(6) 0.0021(7) -0.0022(7)
N33 0.0184(8) 0.0544(12) 0.0329(9) 0.0242(9) -0.0054(8) -0.0114(8)
N41 0.0260(9) 0.0139(7) 0.0288(9) -0.0008(6) -0.0037(7) -0.0001(6)
C41 0.0243(10) 0.0141(8) 0.0197(9) -0.0031(7) -0.0024(8) 0.0043(7)
N42 0.0284(9) 0.0154(7) 0.0336(9) 0.0012(7) 0.0036(8) 0.0005(6)
C42 0.0169(9) 0.0163(8) 0.0211(9) 0.0038(7) 0.0007(7) 0.0001(7)
N43 0.0356(10) 0.0140(7) 0.0347(10) -0.0028(7) 0.0123(8) -0.0032(7)
N51 0.0229(9) 0.0317(10) 0.0288(9) -0.0012(7) -0.0036(7) -0.0013(7)
C51 0.0245(11) 0.0208(9) 0.0198(9) 0.0021(7) -0.0022(8) 0.0005(8)
N52 0.0188(8) 0.0257(8) 0.0205(7) -0.0021(6) -0.0012(7) 0.0038(7)
C52 0.0181(10) 0.0231(9) 0.0144(8) 0.0026(7) 0.0028(7) 0.0086(8)
N53 0.0171(8) 0.0250(8) 0.0364(10) -0.0015(7) -0.0017(7) 0.0007(7)
N61 0.0351(10) 0.0166(7) 0.0283(9) -0.0026(7) 0.0052(8) -0.0022(7)
C61 0.0274(10) 0.0138(8) 0.0226(9) -0.0015(7) 0.0052(8) 0.0040(7)
N62 0.0198(8) 0.0130(7) 0.0309(9) 0.0009(6) 0.0044(7) -0.0008(6)
C62 0.0182(9) 0.0163(8) 0.0238(9) 0.0012(7) 0.0050(8) -0.0022(7)
N63 0.0278(9) 0.0132(7) 0.0512(12) -0.0039(7) 0.0164(8) -0.0019(7)
P1 0.0159(2) 0.0156(2) 0.0144(2) 0.00135(17) -0.00289(18) -0.00063(17)
C111 0.0142(9) 0.0176(8) 0.0133(7) 0.0007(6) -0.0022(7) 0.0016(7)
C112 0.0144(9) 0.0187(8) 0.0239(9) 0.0033(7) 0.0000(8) -0.0020(7)
C113 0.0227(10) 0.0207(9) 0.0252(10) 0.0077(8) -0.0006(8) 0.0038(7)
C114 0.0169(10) 0.0294(10) 0.0249(10) 0.0018(8) -0.0053(8) 0.0038(8)
C115 0.0185(10) 0.0267(10) 0.0334(11) 0.0024(8) -0.0063(9) -0.0047(8)
C116 0.0208(10) 0.0181(9) 0.0249(9) 0.0039(7) -0.0029(8) -0.0021(7)
C121 0.0193(10) 0.0204(9) 0.0154(8) 0.0007(7) -0.0036(7) -0.0031(7)
C122 0.0198(10) 0.0318(11) 0.0249(10) 0.0003(8) -0.0017(8) -0.0032(8)
C123 0.0200(10) 0.0447(13) 0.0321(11) 0.0011(9) -0.0049(9) -0.0123(10)
C124 0.0381(12) 0.0326(11) 0.0287(11) -0.0042(9) -0.0107(10) -0.0151(9)
C125 0.0387(12) 0.0261(10) 0.0312(12) -0.0074(9) -0.0065(10) -0.0021(9)
C126 0.0234(10) 0.0235(9) 0.0253(10) -0.0050(8) -0.0029(8) 0.0001(8)
C131 0.0171(9) 0.0173(8) 0.0199(9) -0.0035(7) -0.0026(7) -0.0006(7)
C132 0.0337(12) 0.0325(11) 0.0247(10) -0.0006(8) -0.0085(9) 0.0136(9)
C133 0.0386(13) 0.0313(11) 0.0381(13) -0.0028(10) -0.0068(11) 0.0153(10)
C134 0.0325(13) 0.0296(11) 0.0372(12) -0.0120(10) 0.0044(10) 0.0057(9)
C135 0.0409(12) 0.0313(11) 0.0221(9) -0.0045(9) 0.0045(9) 0.0015(10)
C136 0.0279(11) 0.0209(9) 0.0205(9) 0.0023(7) -0.0013(8) 0.0016(8)
C140 0.0248(10) 0.0222(9) 0.0171(9) 0.0063(7) -0.0037(8) -0.0028(7)
P2 0.0168(2) 0.0168(2) 0.0191(2) 0.00362(18) 0.00308(19) -0.00027(18)
C211 0.0160(9) 0.0190(8) 0.0223(9) 0.0056(7) 0.0024(8) -0.0007(7)
C212 0.0188(10) 0.0236(9) 0.0229(9) 0.0021(8) 0.0033(8) 0.0017(7)
C213 0.0200(10) 0.0206(9) 0.0325(11) 0.0017(8) -0.0015(8) 0.0009(8)
C214 0.0150(9) 0.0242(9) 0.0339(11) 0.0105(8) 0.0024(8) -0.0007(7)
C215 0.0209(10) 0.0354(11) 0.0263(10) 0.0095(8) 0.0058(9) 0.0023(9)
C216 0.0220(10) 0.0286(10) 0.0191(9) 0.0065(7) 0.0019(8) -0.0001(8)
C221 0.0184(10) 0.0227(9) 0.0164(8) -0.0011(7) 0.0031(7) 0.0026(7)
C222 0.0225(10) 0.0326(10) 0.0258(10) -0.0004(9) 0.0021(9) -0.0006(8)
C223 0.0211(11) 0.0526(14) 0.0280(10) -0.0094(10) -0.0024(9) 0.0051(10)
C224 0.0319(12) 0.0515(14) 0.0201(10) -0.0023(9) -0.0009(9) 0.0214(11)
C225 0.0383(13) 0.0322(11) 0.0226(10) 0.0062(9) 0.0038(9) 0.0117(10)
C226 0.0255(10) 0.0266(9) 0.0209(9) 0.0034(8) 0.0017(8) 0.0015(8)
C231 0.0134(9) 0.0207(9) 0.0208(9) 0.0037(7) 0.0019(7) -0.0007(7)
C232 0.0315(11) 0.0197(9) 0.0260(10) 0.0059(8) 0.0009(9) -0.0003(8)
C233 0.0407(13) 0.0312(11) 0.0238(10) 0.0139(9) 0.0001(10) -0.0032(10)
C234 0.0241(11) 0.0385(12) 0.0182(9) 0.0032(8) 0.0033(8) -0.0033(9)
C235 0.0222(10) 0.0337(11) 0.0252(10) -0.0002(8) 0.0014(8) 0.0079(9)
C236 0.0187(10) 0.0270(10) 0.0209(9) 0.0071(8) 0.0033(8) 0.0058(8)
C240 0.0274(11) 0.0198(9) 0.0314(11) 0.0003(8) 0.0077(9) 0.0006(8)
 
_geom_special_details
;
 All esds (except the esd in the dihedral angle between two l.s. planes)
 are estimated using the full covariance matrix.  The cell esds are taken
 into account individually in the estimation of esds in distances, angles
 and torsion angles; correlations between esds in cell parameters are only
 used when they are defined by crystal symmetry.  An approximate (isotropic)
 treatment of cell esds is used for estimating esds involving l.s. planes.
;
 
loop_
 _geom_bond_atom_site_label_1
 _geom_bond_atom_site_label_2
 _geom_bond_distance
 _geom_bond_site_symmetry_2
 _geom_bond_publ_flag
Co1 N62 2.0902(14) 3_545 ?
Co1 N11 2.1090(15) . ?
Co1 N41 2.1107(15) . ?
Co1 N32 2.1362(15) 4_455 ?
Co1 N21 2.1501(15) . ?
Co1 N31 2.1506(15) . ?
Co2 N42 2.0879(15) 3_545 ?
Co2 N61 2.0959(15) . ?
Co2 N51 2.1266(17) . ?
Co2 N12 2.1280(17) . ?
Co2 N22 2.1297(16) . ?
Co2 N52 2.1852(15) 4_456 ?
N11 C11 1.143(2) . ?
C11 N13 1.318(2) . ?
N12 C12 1.148(2) . ?
C12 N13 1.311(2) . ?
N21 C21 1.156(2) . ?
C21 N23 1.306(2) . ?
N22 C22 1.150(2) . ?
C22 N23 1.317(2) . ?
N31 C31 1.150(2) . ?
C31 N33 1.299(2) . ?
N32 C32 1.152(2) . ?
N32 Co1 2.1364(15) 4 ?
C32 N33 1.309(2) . ?
N41 C41 1.147(2) . ?
C41 N43 1.307(2) . ?
N42 C42 1.144(2) . ?
N42 Co2 2.0879(15) 3 ?
C42 N43 1.302(2) . ?
N51 C51 1.154(3) . ?
C51 N53 1.308(2) . ?
N52 C52 1.162(2) . ?
N52 Co2 2.1852(15) 4_556 ?
C52 N53 1.304(2) . ?
N61 C61 1.149(2) . ?
C61 N63 1.301(2) . ?
N62 C62 1.146(2) . ?
N62 Co1 2.0902(14) 3 ?
C62 N63 1.307(2) . ?
P1 C140 1.7879(18) . ?
P1 C111 1.7883(18) . ?
P1 C131 1.7945(18) . ?
P1 C121 1.7963(18) . ?
C111 C112 1.393(2) . ?
C111 C116 1.399(3) . ?
C112 C113 1.382(3) . ?
C113 C114 1.375(3) . ?
C114 C115 1.390(3) . ?
C115 C116 1.379(3) . ?
C121 C122 1.394(3) . ?
C121 C126 1.394(3) . ?
C122 C123 1.389(3) . ?
C123 C124 1.374(3) . ?
C124 C125 1.389(3) . ?
C125 C126 1.385(3) . ?
C131 C136 1.392(3) . ?
C131 C132 1.393(3) . ?
C132 C133 1.384(3) . ?
C133 C134 1.378(3) . ?
C134 C135 1.390(3) . ?
C135 C136 1.380(3) . ?
P2 C240 1.7915(19) . ?
P2 C211 1.7915(18) . ?
P2 C221 1.7919(19) . ?
P2 C231 1.7940(19) . ?
C211 C216 1.394(3) . ?
C211 C212 1.395(3) . ?
C212 C213 1.385(3) . ?
C213 C214 1.385(3) . ?
C214 C215 1.382(3) . ?
C215 C216 1.385(3) . ?
C221 C226 1.388(3) . ?
C221 C222 1.402(3) . ?
C222 C223 1.378(3) . ?
C223 C224 1.381(3) . ?
C224 C225 1.376(3) . ?
C225 C226 1.392(3) . ?
C231 C232 1.394(3) . ?
C231 C236 1.397(3) . ?
C232 C233 1.378(3) . ?
C233 C234 1.382(3) . ?
C234 C235 1.381(3) . ?
C235 C236 1.388(3) . ?
 
loop_
 _geom_angle_atom_site_label_1
 _geom_angle_atom_site_label_2
 _geom_angle_atom_site_label_3
 _geom_angle
 _geom_angle_site_symmetry_1
 _geom_angle_site_symmetry_3
 _geom_angle_publ_flag
N62 Co1 N11 93.47(6) 3_545 . ?
N62 Co1 N41 173.97(6) 3_545 . ?
N11 Co1 N41 92.03(7) . . ?
N62 Co1 N32 91.05(6) 3_545 4_455 ?
N11 Co1 N32 83.81(6) . 4_455 ?
N41 Co1 N32 92.00(6) . 4_455 ?
N62 Co1 N21 89.73(6) 3_545 . ?
N11 Co1 N21 86.00(6) . . ?
N41 Co1 N21 88.20(6) . . ?
N32 Co1 N21 169.81(6) 4_455 . ?
N62 Co1 N31 89.58(6) 3_545 . ?
N11 Co1 N31 176.52(7) . . ?
N41 Co1 N31 84.86(7) . . ?
N32 Co1 N31 97.82(6) 4_455 . ?
N21 Co1 N31 92.34(6) . . ?
N42 Co2 N61 176.77(7) 3_545 . ?
N42 Co2 N51 88.91(7) 3_545 . ?
N61 Co2 N51 87.97(7) . . ?
N42 Co2 N12 91.32(7) 3_545 . ?
N61 Co2 N12 91.82(7) . . ?
N51 Co2 N12 178.67(7) . . ?
N42 Co2 N22 91.96(7) 3_545 . ?
N61 Co2 N22 88.92(7) . . ?
N51 Co2 N22 90.95(6) . . ?
N12 Co2 N22 87.73(6) . . ?
N42 Co2 N52 90.36(6) 3_545 4_456 ?
N61 Co2 N52 89.01(6) . 4_456 ?
N51 Co2 N52 93.66(6) . 4_456 ?
N12 Co2 N52 87.65(6) . 4_456 ?
N22 Co2 N52 174.88(6) . 4_456 ?
C11 N11 Co1 174.52(15) . . ?
N11 C11 N13 175.0(2) . . ?
C12 N12 Co2 153.44(15) . . ?
N12 C12 N13 174.8(2) . . ?
C12 N13 C11 116.66(16) . . ?
C21 N21 Co1 152.14(14) . . ?
N21 C21 N23 174.66(19) . . ?
C22 N22 Co2 169.06(15) . . ?
N22 C22 N23 174.3(2) . . ?
C21 N23 C22 118.72(16) . . ?
C31 N31 Co1 134.31(14) . . ?
N31 C31 N33 173.59(19) . . ?
C32 N32 Co1 155.89(14) . 4 ?
N32 C32 N33 174.53(19) . . ?
C31 N33 C32 120.88(17) . . ?
C41 N41 Co1 156.48(15) . . ?
N41 C41 N43 172.5(2) . . ?
C42 N42 Co2 168.20(17) . 3 ?
N42 C42 N43 171.3(2) . . ?
C42 N43 C41 123.58(17) . . ?
C51 N51 Co2 157.94(16) . . ?
N51 C51 N53 174.2(2) . . ?
C52 N52 Co2 127.87(14) . 4_556 ?
N52 C52 N53 172.26(19) . . ?
C52 N53 C51 121.18(17) . . ?
C61 N61 Co2 157.47(16) . . ?
N61 C61 N63 172.3(2) . . ?
C62 N62 Co1 167.13(16) . 3 ?
N62 C62 N63 170.9(2) . . ?
C61 N63 C62 123.91(17) . . ?
C140 P1 C111 110.94(9) . . ?
C140 P1 C131 109.36(9) . . ?
C111 P1 C131 108.58(8) . . ?
C140 P1 C121 106.84(9) . . ?
C111 P1 C121 109.74(8) . . ?
C131 P1 C121 111.38(9) . . ?
C112 C111 C116 119.82(16) . . ?
C112 C111 P1 120.47(14) . . ?
C116 C111 P1 119.60(13) . . ?
C113 C112 C111 120.00(17) . . ?
C114 C113 C112 119.99(18) . . ?
C113 C114 C115 120.57(18) . . ?
C116 C115 C114 120.03(19) . . ?
C115 C116 C111 119.59(17) . . ?
C122 C121 C126 120.33(18) . . ?
C122 C121 P1 120.80(15) . . ?
C126 C121 P1 118.64(15) . . ?
C123 C122 C121 119.4(2) . . ?
C124 C123 C122 120.36(19) . . ?
C123 C124 C125 120.35(19) . . ?
C126 C125 C124 120.2(2) . . ?
C125 C126 C121 119.39(19) . . ?
C136 C131 C132 119.75(18) . . ?
C136 C131 P1 120.03(14) . . ?
C132 C131 P1 120.17(15) . . ?
C133 C132 C131 119.87(19) . . ?
C134 C133 C132 120.2(2) . . ?
C133 C134 C135 120.3(2) . . ?
C136 C135 C134 119.89(19) . . ?
C135 C136 C131 120.04(18) . . ?
C240 P2 C211 109.29(9) . . ?
C240 P2 C221 109.23(10) . . ?
C211 P2 C221 109.70(8) . . ?
C240 P2 C231 112.20(9) . . ?
C211 P2 C231 107.48(9) . . ?
C221 P2 C231 108.91(8) . . ?
C216 C211 C212 120.38(17) . . ?
C216 C211 P2 118.99(14) . . ?
C212 C211 P2 120.62(14) . . ?
C213 C212 C211 119.90(18) . . ?
C212 C213 C214 119.47(19) . . ?
C215 C214 C213 120.76(18) . . ?
C214 C215 C216 120.37(18) . . ?
C215 C216 C211 119.11(18) . . ?
C226 C221 C222 119.88(18) . . ?
C226 C221 P2 121.23(15) . . ?
C222 C221 P2 118.84(15) . . ?
C223 C222 C221 119.5(2) . . ?
C222 C223 C224 120.5(2) . . ?
C225 C224 C223 120.3(2) . . ?
C224 C225 C226 120.2(2) . . ?
C221 C226 C225 119.60(19) . . ?
C232 C231 C236 120.07(17) . . ?
C232 C231 P2 121.53(15) . . ?
C236 C231 P2 118.10(14) . . ?
C233 C232 C231 119.35(19) . . ?
C232 C233 C234 120.74(19) . . ?
C235 C234 C233 120.24(18) . . ?
C234 C235 C236 119.90(19) . . ?
C235 C236 C231 119.68(18) . . ?
 
_diffrn_measured_fraction_theta_max    0.975
_diffrn_reflns_theta_full              32.06
_diffrn_measured_fraction_theta_full   0.975
_refine_diff_density_max    0.383
_refine_diff_density_min   -0.351
_refine_diff_density_rms    0.074

_publ_contact_author
;
    Dr. S.R. Batten
    School of Chemistry
    Monash University 3800
    AUSTRALIA
;

_publ_contact_author_phone            ' +61 3 9905 4606 '
_publ_contact_author_fax              ' +61 3 9905 4597 '
_publ_contact_author_email            ' 
stuart.batten@sci.monash.edu.au '

loop_
_publ_author_name
_publ_author_address
'van der Werff, Patricia M.' 
; 
School of Chemistry
Monash University 3800
AUSTRALIA
;
'Batten, Stuart R.' 
; 
School of Chemistry
Monash University 3800
Australia
;
'Jensen, Paul' 
; 
Department of Chemistry
Trinity College
Dublin 2
Ireland
;
'Moubaraki, Boujemaa' 
; 
School of Chemistry
Monash University 3800
Australia
;
'Murray, Keith S.' 
; 
School of Chemistry
Monash University 3800
Australia
;
'Cashion, John D.' 
; 
School of Physics and Materials Engineering
Monash University 3800
Australia
;

_publ_section_title
;
 Structure and magnetism of 3D anionic metal dicyanamide
 (MePh3P)[M(dca)3] (M = Fe, Co, Ni) and (EtPh3P)[M(dca)3]
 (M = Mn, Co, Ni) networks
;


#=END


data_MeNi
 
_audit_creation_method            SHELXL-97
_chemical_name_systematic
;
 Methyltriphenylphosphonium tris(dicyanamido)nickelate(II)
;
_chemical_name_common             ?
_chemical_melting_point           ?
_chemical_formula_moiety          ?
_chemical_formula_sum
 'C25 H18 N9 Ni P'
_chemical_formula_weight          534.16
 
loop_
 _atom_type_symbol
 _atom_type_description
 _atom_type_scat_dispersion_real
 _atom_type_scat_dispersion_imag
 _atom_type_scat_source
 'C'  'C'   0.0033   0.0016
 'International Tables Vol C Tables 4.2.6.8 and 6.1.1.4'
 'H'  'H'   0.0000   0.0000
 'International Tables Vol C Tables 4.2.6.8 and 6.1.1.4'
 'N'  'N'   0.0061   0.0033
 'International Tables Vol C Tables 4.2.6.8 and 6.1.1.4'
 'P'  'P'   0.1023   0.0942
 'International Tables Vol C Tables 4.2.6.8 and 6.1.1.4'
 'Ni'  'Ni'   0.3393   1.1124
 'International Tables Vol C Tables 4.2.6.8 and 6.1.1.4'
 
_symmetry_cell_setting            Orthorhombic
_symmetry_space_group_name_H-M    P2(1)2(1)2(1)
 
loop_
 _symmetry_equiv_pos_as_xyz
 'x, y, z'
 '-x+1/2, -y, z+1/2'
 '-x, y+1/2, -z+1/2'
 'x+1/2, -y+1/2, -z'
 
_cell_length_a                    13.8039(3)
_cell_length_b                    16.8679(2)
_cell_length_c                    20.7639(6)
_cell_angle_alpha                 90.00
_cell_angle_beta                  90.00
_cell_angle_gamma                 90.00
_cell_volume                      4834.73(18)
_cell_formula_units_Z             8
_cell_measurement_temperature     123(2)
_cell_measurement_reflns_used     ?
_cell_measurement_theta_min       ?
_cell_measurement_theta_max       ?
 
_exptl_crystal_description        plate
_exptl_crystal_colour             green
_exptl_crystal_size_max           0.30
_exptl_crystal_size_mid           0.15
_exptl_crystal_size_min           0.075
_exptl_crystal_density_meas       ?
_exptl_crystal_density_diffrn     1.468
_exptl_crystal_density_method     'not measured'
_exptl_crystal_F_000              2192
_exptl_absorpt_coefficient_mu     0.903
_exptl_absorpt_correction_type    face-indexed
_exptl_absorpt_correction_T_min   0.8523
_exptl_absorpt_correction_T_max   0.9354
_exptl_absorpt_process_details    ?
 
_exptl_special_details
;
 ?
;
 
_diffrn_ambient_temperature       123(2)
_diffrn_radiation_wavelength      0.71073
_diffrn_radiation_type            MoK\a
_diffrn_radiation_source          'fine-focus sealed tube'
_diffrn_radiation_monochromator   graphite
_diffrn_measurement_device_type   ?
_diffrn_measurement_method        '\w scans'
_diffrn_detector_area_resol_mean  ?
_diffrn_standards_number          ?
_diffrn_standards_interval_count  ?
_diffrn_standards_interval_time   ?
_diffrn_standards_decay_%         ?
_diffrn_reflns_number             39177
_diffrn_reflns_av_R_equivalents   0.0905
_diffrn_reflns_av_sigmaI/netI     0.1764
_diffrn_reflns_limit_h_min        -19
_diffrn_reflns_limit_h_max        19
_diffrn_reflns_limit_k_min        -24
_diffrn_reflns_limit_k_max        16
_diffrn_reflns_limit_l_min        -26
_diffrn_reflns_limit_l_max        29
_diffrn_reflns_theta_min          2.30
_diffrn_reflns_theta_max          30.50
_reflns_number_total              14573
_reflns_number_gt                 8767
_reflns_threshold_expression      >2sigma(I)
 
_computing_data_collection        'Siemens XSCANS'
_computing_cell_refinement        'Siemens XSCANS'
_computing_data_reduction         'Siemens SHELXTL'
_computing_structure_solution     'SHELXS-97 (Sheldrick, 1990)'
_computing_structure_refinement   'SHELXL-97 (Sheldrick, 1997)'
_computing_molecular_graphics     'Siemens SHELXTL'
_computing_publication_material   'Siemens SHELXTL'
 
_refine_special_details
;
 Refinement of F^2^ against ALL reflections.  The weighted R-factor wR and
 goodness of fit S are based on F^2^, conventional R-factors R are based
 on F, with F set to zero for negative F^2^. The threshold expression of
 F^2^ > 2sigma(F^2^) is used only for calculating R-factors(gt) etc. and is
 not relevant to the choice of reflections for refinement.  R-factors based
 on F^2^ are statistically about twice as large as those based on F, and R-
 factors based on ALL data will be even larger.
;
 
_refine_ls_structure_factor_coef  Fsqd
_refine_ls_matrix_type            full
_refine_ls_weighting_scheme       calc
_refine_ls_weighting_details
 'calc w=1/[\s^2^(Fo^2^)+(0.0185P)^2^+0.0000P] where P=(Fo^2^+2Fc^2^)/3'
_atom_sites_solution_primary      direct
_atom_sites_solution_secondary    difmap
_atom_sites_solution_hydrogens    geom
_refine_ls_hydrogen_treatment     mixed
_refine_ls_extinction_method      none
_refine_ls_extinction_coef        ?
_refine_ls_abs_structure_details
 'Flack H D (1983), Acta Cryst. A39, 876-881'
_refine_ls_abs_structure_Flack    -0.015(8)
_refine_ls_number_reflns          14573
_refine_ls_number_parameters      649
_refine_ls_number_restraints      0
_refine_ls_R_factor_all           0.1388
_refine_ls_R_factor_gt            0.0639
_refine_ls_wR_factor_ref          0.0790
_refine_ls_wR_factor_gt           0.0672
_refine_ls_goodness_of_fit_ref    0.978
_refine_ls_restrained_S_all       0.978
_refine_ls_shift/su_max           0.001
_refine_ls_shift/su_mean          0.000
 
loop_
 _atom_site_label
 _atom_site_type_symbol
 _atom_site_fract_x
 _atom_site_fract_y
 _atom_site_fract_z
 _atom_site_U_iso_or_equiv
 _atom_site_adp_type
 _atom_site_occupancy
 _atom_site_symmetry_multiplicity
 _atom_site_calc_flag
 _atom_site_refinement_flags
 _atom_site_disorder_assembly
 _atom_site_disorder_group
Ni1 Ni -0.12000(3) 0.20366(2) 0.077074(19) 0.01135(9) Uani 1 1 d . . .
Ni2 Ni 0.03669(3) 0.20287(2) 0.41362(2) 0.01352(10) Uani 1 1 d . . .
N11 N -0.17025(18) 0.20902(15) 0.17056(13) 0.0185(6) Uani 1 1 d . . .
C11 C -0.1899(2) 0.21249(17) 0.22406(17) 0.0146(7) Uani 1 1 d . . .
N12 N -0.09870(19) 0.21513(14) 0.37065(14) 0.0209(7) Uani 1 1 d . . .
C12 C -0.1528(2) 0.21475(17) 0.32899(16) 0.0169(8) Uani 1 1 d . . .
N13 N -0.2202(2) 0.21490(16) 0.28413(14) 0.0276(7) Uani 1 1 d . . .
N21 N 0.01937(19) 0.19252(14) 0.11780(13) 0.0171(6) Uani 1 1 d . . .
C21 C 0.0705(2) 0.18631(15) 0.16083(18) 0.0130(7) Uani 1 1 d . . .
N22 N 0.09432(18) 0.19501(14) 0.32062(14) 0.0192(6) Uani 1 1 d . . .
C22 C 0.1102(2) 0.18910(16) 0.26666(18) 0.0152(7) Uani 1 1 d . . .
N23 N 0.1369(2) 0.18000(13) 0.20623(14) 0.0213(7) Uani 1 1 d . . .
N31 N -0.06405(19) 0.20419(15) -0.01724(12) 0.0188(6) Uani 1 1 d . . .
C31 C -0.0025(2) 0.23723(17) -0.04300(15) 0.0143(7) Uani 1 1 d . . .
N32 N 0.23384(19) 0.28460(13) -0.05209(12) 0.0150(6) Uani 1 1 d . . .
C32 C 0.1519(2) 0.27914(15) -0.06147(15) 0.0157(8) Uani 1 1 d . . .
N33 N 0.06011(19) 0.27730(14) -0.07727(15) 0.0305(7) Uani 1 1 d . . .
N41 N -0.09897(18) 0.32539(13) 0.07437(14) 0.0199(7) Uani 1 1 d . . .
C41 C -0.0593(2) 0.38342(17) 0.06327(15) 0.0152(8) Uani 1 1 d . . .
N42 N -0.02045(18) 0.58229(13) 0.08092(14) 0.0219(7) Uani 1 1 d . . .
C42 C -0.0193(2) 0.51636(17) 0.06723(15) 0.0159(7) Uani 1 1 d . . .
N43 N -0.0062(2) 0.44429(14) 0.04606(14) 0.0263(8) Uani 1 1 d . . .
N51 N 0.1738(2) 0.19125(14) 0.45429(13) 0.0218(7) Uani 1 1 d . . .
C51 C 0.2570(3) 0.19064(16) 0.45697(16) 0.0180(8) Uani 1 1 d . . .
N52 N 0.46693(19) 0.28415(14) 0.49491(12) 0.0181(6) Uani 1 1 d . . .
C52 C 0.4088(2) 0.23985(18) 0.47890(16) 0.0170(8) Uani 1 1 d . . .
N53 N 0.3521(2) 0.18295(13) 0.45775(14) 0.0229(7) Uani 1 1 d . . .
N61 N 0.05880(19) 0.32375(13) 0.41087(14) 0.0223(7) Uani 1 1 d . . .
C61 C 0.1018(2) 0.38191(17) 0.40849(16) 0.0184(8) Uani 1 1 d . . .
N62 N 0.13084(18) 0.58224(13) 0.42689(13) 0.0171(6) Uani 1 1 d . . .
C62 C 0.1377(2) 0.51541(16) 0.41700(16) 0.0175(7) Uani 1 1 d . . .
N63 N 0.16099(19) 0.44188(13) 0.40356(15) 0.0306(8) Uani 1 1 d . . .
P1 P 0.26265(6) 0.59654(4) 0.65777(4) 0.01424(19) Uani 1 1 d . . .
C111 C 0.3677(2) 0.56166(15) 0.69953(14) 0.0117(7) Uani 1 1 d . . .
C112 C 0.3655(2) 0.49062(16) 0.73331(15) 0.0167(8) Uani 1 1 d . . .
H11A H 0.3090 0.4584 0.7320 0.020 Uiso 1 1 calc R . .
C113 C 0.4441(2) 0.46672(18) 0.76855(16) 0.0208(8) Uani 1 1 d . . .
H11B H 0.4422 0.4180 0.7914 0.025 Uiso 1 1 calc R . .
C114 C 0.5259(2) 0.51355(17) 0.77080(16) 0.0207(8) Uani 1 1 d . . .
H11C H 0.5800 0.4972 0.7958 0.025 Uiso 1 1 calc R . .
C115 C 0.5297(2) 0.58438(17) 0.73677(16) 0.0229(8) Uani 1 1 d . . .
H11D H 0.5867 0.6159 0.7377 0.027 Uiso 1 1 calc R . .
C116 C 0.4508(2) 0.60847(17) 0.70184(16) 0.0183(8) Uani 1 1 d . . .
H11E H 0.4527 0.6573 0.6791 0.022 Uiso 1 1 calc R . .
C121 C 0.1940(2) 0.51377(17) 0.62834(15) 0.0162(7) Uani 1 1 d . . .
C122 C 0.0932(2) 0.51339(18) 0.63096(16) 0.0226(8) Uani 1 1 d . . .
H12A H 0.0596 0.5553 0.6518 0.027 Uiso 1 1 calc R . .
C123 C 0.0422(3) 0.45150(19) 0.60308(17) 0.0285(9) Uani 1 1 d . . .
H12B H -0.0266 0.4511 0.6047 0.034 Uiso 1 1 calc R . .
C124 C 0.0908(3) 0.39081(19) 0.57317(18) 0.0303(9) Uani 1 1 d . . .
H12C H 0.0555 0.3486 0.5541 0.036 Uiso 1 1 calc R . .
C125 C 0.1906(3) 0.39064(18) 0.57060(17) 0.0311(9) Uani 1 1 d . . .
H12D H 0.2236 0.3481 0.5502 0.037 Uiso 1 1 calc R . .
C126 C 0.2429(2) 0.45251(16) 0.59775(16) 0.0197(8) Uani 1 1 d . . .
H12E H 0.3116 0.4529 0.5954 0.024 Uiso 1 1 calc R . .
C131 C 0.1923(2) 0.65626(16) 0.71231(16) 0.0161(7) Uani 1 1 d . . .
C132 C 0.1315(3) 0.71477(18) 0.68779(18) 0.0306(9) Uani 1 1 d . . .
H13A H 0.1245 0.7213 0.6426 0.037 Uiso 1 1 calc R . .
C133 C 0.0812(3) 0.76358(19) 0.7301(2) 0.0331(10) Uani 1 1 d . . .
H13B H 0.0387 0.8032 0.7139 0.040 Uiso 1 1 calc R . .
C134 C 0.0929(3) 0.75447(19) 0.7950(2) 0.0325(10) Uani 1 1 d . . .
H13C H 0.0593 0.7888 0.8236 0.039 Uiso 1 1 calc R . .
C135 C 0.1528(2) 0.69608(19) 0.82005(17) 0.0282(9) Uani 1 1 d . . .
H13D H 0.1598 0.6900 0.8653 0.034 Uiso 1 1 calc R . .
C136 C 0.2021(2) 0.64702(17) 0.77809(17) 0.0207(8) Uani 1 1 d . . .
H13E H 0.2430 0.6066 0.7946 0.025 Uiso 1 1 calc R . .
C140 C 0.2953(2) 0.65417(16) 0.58939(16) 0.0202(8) Uani 1 1 d . . .
H14A H 0.3339 0.6999 0.6032 0.030 Uiso 1 1 calc R . .
H14B H 0.2366 0.6727 0.5676 0.030 Uiso 1 1 calc R . .
H14C H 0.3335 0.6216 0.5596 0.030 Uiso 1 1 calc R . .
P2 P 0.36001(6) -0.06300(4) 0.15785(4) 0.0163(2) Uani 1 1 d . . .
C211 C 0.4769(2) -0.01728(15) 0.15593(16) 0.0136(7) Uani 1 1 d . . .
C212 C 0.5116(2) 0.02478(16) 0.20862(17) 0.0199(8) Uani 1 1 d . . .
H21A H 0.4740 0.0278 0.2469 0.024 Uiso 1 1 calc R . .
C213 C 0.6009(2) 0.06241(17) 0.20565(17) 0.0213(8) Uani 1 1 d . . .
H21B H 0.6249 0.0910 0.2417 0.026 Uiso 1 1 calc R . .
C214 C 0.6548(2) 0.05765(17) 0.14941(17) 0.0211(8) Uani 1 1 d . . .
H21C H 0.7153 0.0842 0.1467 0.025 Uiso 1 1 calc R . .
C215 C 0.6213(2) 0.01485(17) 0.09741(17) 0.0245(8) Uani 1 1 d . . .
H21D H 0.6594 0.0113 0.0595 0.029 Uiso 1 1 calc R . .
C216 C 0.5325(2) -0.02294(16) 0.10015(16) 0.0200(8) Uani 1 1 d . . .
H21E H 0.5097 -0.0525 0.0643 0.024 Uiso 1 1 calc R . .
C221 C 0.2800(2) -0.01184(16) 0.10422(15) 0.0158(8) Uani 1 1 d . . .
C222 C 0.1913(2) -0.04753(18) 0.08757(18) 0.0242(8) Uani 1 1 d . . .
H22A H 0.1766 -0.0995 0.1023 0.029 Uiso 1 1 calc R . .
C223 C 0.1260(3) -0.0068(2) 0.04988(17) 0.0314(9) Uani 1 1 d . . .
H22B H 0.0661 -0.0309 0.0387 0.038 Uiso 1 1 calc R . .
C224 C 0.1469(3) 0.0684(2) 0.02831(17) 0.0296(9) Uani 1 1 d . . .
H22C H 0.1010 0.0965 0.0030 0.036 Uiso 1 1 calc R . .
C225 C 0.2346(3) 0.10312(19) 0.04356(17) 0.0278(9) Uani 1 1 d . . .
H22D H 0.2494 0.1547 0.0281 0.033 Uiso 1 1 calc R . .
C226 C 0.3011(2) 0.06290(16) 0.08135(17) 0.0228(8) Uani 1 1 d . . .
H22E H 0.3614 0.0869 0.0915 0.027 Uiso 1 1 calc R . .
C231 C 0.3156(2) -0.05414(17) 0.23789(16) 0.0160(8) Uani 1 1 d . . .
C232 C 0.3270(2) -0.11403(18) 0.28410(17) 0.0228(9) Uani 1 1 d . . .
H23A H 0.3539 -0.1636 0.2718 0.027 Uiso 1 1 calc R . .
C233 C 0.3002(3) -0.10212(19) 0.34602(17) 0.0282(9) Uani 1 1 d . . .
H23B H 0.3066 -0.1440 0.3763 0.034 Uiso 1 1 calc R . .
C234 C 0.2633(2) -0.02926(18) 0.36586(17) 0.0247(8) Uani 1 1 d . . .
H23C H 0.2469 -0.0208 0.4098 0.030 Uiso 1 1 calc R . .
C235 C 0.2507(2) 0.03033(18) 0.32139(17) 0.0262(9) Uani 1 1 d . . .
H23D H 0.2238 0.0796 0.3345 0.031 Uiso 1 1 calc R . .
C236 C 0.2768(2) 0.01894(17) 0.25765(16) 0.0196(8) Uani 1 1 d . . .
H23E H 0.2686 0.0605 0.2273 0.024 Uiso 1 1 calc R . .
C240 C 0.3705(3) -0.16392(16) 0.13269(17) 0.0234(8) Uani 1 1 d . . .
H24A H 0.4145 -0.1922 0.1618 0.035 Uiso 1 1 calc R . .
H24B H 0.3962 -0.1659 0.0887 0.035 Uiso 1 1 calc R . .
H24C H 0.3065 -0.1891 0.1338 0.035 Uiso 1 1 calc R . .
 
loop_
 _atom_site_aniso_label
 _atom_site_aniso_U_11
 _atom_site_aniso_U_22
 _atom_site_aniso_U_33
 _atom_site_aniso_U_23
 _atom_site_aniso_U_13
 _atom_site_aniso_U_12
Ni1 0.0111(2) 0.00952(18) 0.0134(2) 0.00076(18) -0.00014(19) -0.00039(16)
Ni2 0.0147(2) 0.01004(18) 0.0158(2) -0.00051(19) -0.0007(2) -0.00119(17)
N11 0.0188(16) 0.0230(14) 0.0137(17) 0.0002(14) -0.0006(13) 0.0021(12)
C11 0.0062(17) 0.0168(16) 0.021(2) -0.0014(16) -0.0040(15) 0.0019(13)
N12 0.0208(18) 0.0201(15) 0.0217(18) 0.0011(13) -0.0017(14) 0.0005(12)
C12 0.018(2) 0.0204(18) 0.012(2) -0.0008(15) 0.0090(16) 0.0042(15)
N13 0.0139(17) 0.0597(19) 0.0092(17) 0.0011(14) 0.0012(14) 0.0121(14)
N21 0.0141(16) 0.0201(14) 0.0171(17) 0.0009(12) -0.0002(13) 0.0024(12)
C21 0.0136(18) 0.0076(16) 0.018(2) 0.0021(14) 0.0100(16) -0.0004(12)
N22 0.0198(17) 0.0179(14) 0.0199(18) -0.0008(13) -0.0007(13) 0.0017(12)
C22 0.0103(18) 0.0148(17) 0.020(2) -0.0007(14) -0.0035(16) 0.0001(13)
N23 0.0177(17) 0.0314(16) 0.0147(18) 0.0002(12) 0.0003(15) 0.0009(12)
N31 0.0158(16) 0.0249(14) 0.0156(16) 0.0027(13) 0.0015(13) 0.0001(13)
C31 0.0127(19) 0.0207(17) 0.0094(19) 0.0002(14) -0.0054(15) 0.0042(14)
N32 0.0129(15) 0.0147(13) 0.0174(16) 0.0004(11) 0.0031(13) -0.0021(11)
C32 0.020(2) 0.0122(16) 0.015(2) 0.0033(12) 0.0026(16) -0.0004(13)
N33 0.0137(16) 0.0468(18) 0.0309(19) 0.0218(15) -0.0048(15) -0.0095(12)
N41 0.0229(16) 0.0112(13) 0.0257(19) -0.0023(12) -0.0033(15) -0.0011(11)
C41 0.0188(19) 0.0144(17) 0.012(2) -0.0048(13) -0.0010(15) 0.0040(14)
N42 0.0233(17) 0.0151(14) 0.0273(18) 0.0006(13) 0.0021(16) -0.0009(11)
C42 0.0136(19) 0.0162(17) 0.018(2) 0.0029(14) -0.0005(15) -0.0009(13)
N43 0.0331(19) 0.0128(14) 0.033(2) -0.0029(13) 0.0118(15) -0.0031(12)
N51 0.0176(17) 0.0220(15) 0.0258(19) -0.0008(13) -0.0030(14) -0.0012(12)
C51 0.024(2) 0.0137(16) 0.016(2) 0.0013(13) -0.0007(17) 0.0010(15)
N52 0.0141(16) 0.0212(14) 0.0189(16) -0.0018(12) -0.0006(13) 0.0024(13)
C52 0.015(2) 0.0206(17) 0.016(2) 0.0045(15) 0.0062(16) 0.0103(15)
N53 0.0115(16) 0.0238(15) 0.033(2) -0.0039(13) -0.0014(14) 0.0002(12)
N61 0.0260(17) 0.0156(14) 0.0252(19) -0.0024(12) 0.0031(15) -0.0021(11)
C61 0.022(2) 0.0161(17) 0.017(2) -0.0015(14) 0.0027(17) 0.0040(14)
N62 0.0144(15) 0.0130(13) 0.0240(18) 0.0023(12) 0.0028(14) -0.0012(11)
C62 0.0154(19) 0.0159(17) 0.021(2) 0.0030(15) 0.0039(17) -0.0019(13)
N63 0.0239(17) 0.0109(14) 0.057(2) -0.0046(14) 0.0157(16) -0.0018(12)
P1 0.0143(5) 0.0145(4) 0.0139(5) 0.0018(4) -0.0032(4) -0.0006(3)
C111 0.0085(18) 0.0158(16) 0.0108(18) -0.0031(13) -0.0001(14) -0.0015(13)
C112 0.0108(19) 0.0166(16) 0.023(2) 0.0035(14) 0.0019(16) -0.0030(13)
C113 0.018(2) 0.0201(18) 0.025(2) 0.0101(15) -0.0004(17) 0.0049(14)
C114 0.013(2) 0.0246(18) 0.025(2) 0.0013(15) -0.0064(17) 0.0052(15)
C115 0.013(2) 0.0239(18) 0.032(2) -0.0001(15) -0.0085(18) -0.0041(15)
C116 0.017(2) 0.0141(16) 0.023(2) 0.0039(14) -0.0001(17) -0.0006(14)
C121 0.0146(19) 0.0200(17) 0.014(2) -0.0003(14) -0.0046(16) -0.0036(14)
C122 0.021(2) 0.0258(18) 0.020(2) 0.0003(15) -0.0014(17) -0.0014(15)
C123 0.0136(19) 0.044(2) 0.028(2) 0.0037(17) -0.0041(18) -0.0095(17)
C124 0.034(2) 0.031(2) 0.026(2) -0.0039(18) -0.010(2) -0.0145(16)
C125 0.042(3) 0.0228(18) 0.029(3) -0.0052(17) -0.009(2) -0.0011(17)
C126 0.0202(19) 0.0188(16) 0.020(2) -0.0034(14) -0.0014(17) -0.0004(14)
C131 0.0129(19) 0.0172(16) 0.018(2) -0.0043(14) -0.0006(16) -0.0004(13)
C132 0.030(2) 0.035(2) 0.027(2) 0.0008(17) -0.0055(19) 0.0146(18)
C133 0.033(3) 0.029(2) 0.038(3) 0.0007(18) -0.006(2) 0.0121(16)
C134 0.030(3) 0.025(2) 0.043(3) -0.0114(19) 0.011(2) 0.0034(16)
C135 0.033(2) 0.0313(19) 0.020(2) -0.0060(17) 0.0063(17) -0.0019(18)
C136 0.023(2) 0.0169(17) 0.022(2) 0.0012(15) -0.0019(18) 0.0009(14)
C140 0.0195(19) 0.0258(17) 0.015(2) 0.0025(15) -0.0016(17) -0.0031(14)
P2 0.0145(5) 0.0154(4) 0.0189(5) 0.0033(4) 0.0035(4) -0.0003(3)
C211 0.0106(18) 0.0139(15) 0.0164(19) 0.0065(14) 0.0025(16) -0.0021(13)
C212 0.020(2) 0.0202(17) 0.020(2) 0.0003(15) 0.0063(16) 0.0015(14)
C213 0.022(2) 0.0178(17) 0.024(2) -0.0006(15) -0.0043(17) -0.0002(14)
C214 0.0118(18) 0.0217(17) 0.030(2) 0.0097(16) -0.0020(17) 0.0001(14)
C215 0.018(2) 0.0302(18) 0.026(2) 0.0085(16) 0.0087(18) 0.0044(15)
C216 0.018(2) 0.0246(17) 0.017(2) 0.0038(14) -0.0010(17) -0.0016(15)
C221 0.0142(19) 0.0165(16) 0.017(2) -0.0008(13) 0.0019(15) 0.0027(13)
C222 0.0187(19) 0.0286(18) 0.025(2) -0.0006(17) 0.0041(19) -0.0012(15)
C223 0.018(2) 0.050(2) 0.026(2) -0.0128(18) 0.0006(19) 0.0047(18)
C224 0.027(2) 0.045(2) 0.017(2) 0.0012(17) 0.0025(18) 0.0205(19)
C225 0.035(2) 0.0283(19) 0.020(2) 0.0054(16) 0.0056(19) 0.0105(18)
C226 0.021(2) 0.0274(18) 0.020(2) 0.0061(17) 0.0038(18) 0.0001(14)
C231 0.0083(18) 0.0201(17) 0.019(2) 0.0023(14) 0.0042(15) -0.0015(13)
C232 0.026(2) 0.0178(17) 0.024(2) 0.0050(15) 0.0006(18) 0.0021(14)
C233 0.040(2) 0.0277(19) 0.017(2) 0.0105(16) 0.0004(19) -0.0006(17)
C234 0.022(2) 0.035(2) 0.017(2) 0.0042(16) 0.0024(17) -0.0032(16)
C235 0.022(2) 0.031(2) 0.026(2) 0.0009(16) 0.0044(18) 0.0092(16)
C236 0.014(2) 0.0264(18) 0.019(2) 0.0068(15) 0.0014(16) 0.0016(14)
C240 0.020(2) 0.0209(16) 0.030(2) -0.0015(15) 0.0084(18) 0.0023(14)
 
_geom_special_details
;
 All esds (except the esd in the dihedral angle between two l.s. planes)
 are estimated using the full covariance matrix.  The cell esds are taken
 into account individually in the estimation of esds in distances, angles
 and torsion angles; correlations between esds in cell parameters are only
 used when they are defined by crystal symmetry.  An approximate (isotropic)
 treatment of cell esds is used for estimating esds involving l.s. planes.
;
 
loop_
 _geom_bond_atom_site_label_1
 _geom_bond_atom_site_label_2
 _geom_bond_distance
 _geom_bond_site_symmetry_2
 _geom_bond_publ_flag
Ni1 N62 2.055(2) 3_545 ?
Ni1 N11 2.063(3) . ?
Ni1 N41 2.074(2) . ?
Ni1 N32 2.093(3) 4_455 ?
Ni1 N31 2.105(3) . ?
Ni1 N21 2.110(3) . ?
Ni2 N42 2.049(2) 3_545 ?
Ni2 N61 2.063(2) . ?
Ni2 N12 2.081(3) . ?
Ni2 N51 2.082(3) . ?
Ni2 N22 2.093(3) . ?
Ni2 N52 2.141(3) 4_456 ?
N11 C11 1.145(4) . ?
C11 N13 1.316(4) . ?
N12 C12 1.143(4) . ?
C12 N13 1.317(4) . ?
N21 C21 1.144(4) . ?
C21 N23 1.318(4) . ?
N22 C22 1.146(4) . ?
C22 N23 1.317(4) . ?
N31 C31 1.148(4) . ?
C31 N33 1.308(4) . ?
N32 C32 1.152(4) . ?
N32 Ni1 2.093(3) 4 ?
C32 N33 1.309(4) . ?
N41 C41 1.145(3) . ?
C41 N43 1.311(4) . ?
N42 C42 1.148(3) . ?
N42 Ni2 2.049(2) 3 ?
C42 N43 1.306(4) . ?
N51 C51 1.150(4) . ?
C51 N53 1.319(4) . ?
N52 C52 1.146(4) . ?
N52 Ni2 2.141(3) 4_556 ?
C52 N53 1.314(4) . ?
N61 C61 1.148(3) . ?
C61 N63 1.304(4) . ?
N62 C62 1.150(3) . ?
N62 Ni1 2.055(2) 3 ?
C62 N63 1.312(3) . ?
P1 C140 1.779(3) . ?
P1 C111 1.789(3) . ?
P1 C121 1.795(3) . ?
P1 C131 1.800(3) . ?
C111 C112 1.389(4) . ?
C111 C116 1.393(4) . ?
C112 C113 1.369(4) . ?
C113 C114 1.379(4) . ?
C114 C115 1.389(4) . ?
C115 C116 1.371(4) . ?
C121 C126 1.388(4) . ?
C121 C122 1.392(4) . ?
C122 C123 1.386(4) . ?
C123 C124 1.373(4) . ?
C124 C125 1.378(4) . ?
C125 C126 1.389(4) . ?
C131 C136 1.381(4) . ?
C131 C132 1.392(4) . ?
C132 C133 1.390(5) . ?
C133 C134 1.368(5) . ?
C134 C135 1.387(5) . ?
C135 C136 1.381(4) . ?
P2 C231 1.777(3) . ?
P2 C240 1.787(3) . ?
P2 C211 1.789(3) . ?
P2 C221 1.790(3) . ?
C211 C212 1.389(4) . ?
C211 C216 1.393(4) . ?
C212 C213 1.388(4) . ?
C213 C214 1.386(4) . ?
C214 C215 1.379(4) . ?
C215 C216 1.382(4) . ?
C221 C226 1.378(4) . ?
C221 C222 1.408(4) . ?
C222 C223 1.377(5) . ?
C223 C224 1.377(5) . ?
C224 C225 1.382(5) . ?
C225 C226 1.385(4) . ?
C231 C232 1.402(4) . ?
C231 C236 1.405(4) . ?
C232 C233 1.353(5) . ?
C233 C234 1.393(4) . ?
C234 C235 1.376(4) . ?
C235 C236 1.385(4) . ?
 
loop_
 _geom_angle_atom_site_label_1
 _geom_angle_atom_site_label_2
 _geom_angle_atom_site_label_3
 _geom_angle
 _geom_angle_site_symmetry_1
 _geom_angle_site_symmetry_3
 _geom_angle_publ_flag
N62 Ni1 N11 93.26(11) 3_545 . ?
N62 Ni1 N41 174.54(11) 3_545 . ?
N11 Ni1 N41 91.67(11) . . ?
N62 Ni1 N32 90.81(9) 3_545 4_455 ?
N11 Ni1 N32 84.55(10) . 4_455 ?
N41 Ni1 N32 91.98(9) . 4_455 ?
N62 Ni1 N31 89.64(10) 3_545 . ?
N11 Ni1 N31 176.68(10) . . ?
N41 Ni1 N31 85.37(11) . . ?
N32 Ni1 N31 97.05(10) 4_455 . ?
N62 Ni1 N21 89.64(9) 3_545 . ?
N11 Ni1 N21 86.18(10) . . ?
N41 Ni1 N21 88.36(10) . . ?
N32 Ni1 N21 170.73(10) 4_455 . ?
N31 Ni1 N21 92.22(10) . . ?
N42 Ni2 N61 177.27(11) 3_545 . ?
N42 Ni2 N12 91.38(10) 3_545 . ?
N61 Ni2 N12 91.31(10) . . ?
N42 Ni2 N51 89.06(10) 3_545 . ?
N61 Ni2 N51 88.27(10) . . ?
N12 Ni2 N51 178.51(11) . . ?
N42 Ni2 N22 91.70(11) 3_545 . ?
N61 Ni2 N22 88.90(11) . . ?
N12 Ni2 N22 87.25(10) . . ?
N51 Ni2 N22 91.31(11) . . ?
N42 Ni2 N52 90.19(10) 3_545 4_456 ?
N61 Ni2 N52 89.42(10) . 4_456 ?
N12 Ni2 N52 88.07(10) . 4_456 ?
N51 Ni2 N52 93.36(11) . 4_456 ?
N22 Ni2 N52 174.99(10) . 4_456 ?
C11 N11 Ni1 174.0(3) . . ?
N11 C11 N13 175.0(3) . . ?
C12 N12 Ni2 155.6(3) . . ?
N12 C12 N13 175.8(3) . . ?
C11 N13 C12 116.5(3) . . ?
C21 N21 Ni1 152.2(3) . . ?
N21 C21 N23 174.2(3) . . ?
C22 N22 Ni2 168.6(3) . . ?
N22 C22 N23 174.5(4) . . ?
C22 N23 C21 118.6(3) . . ?
C31 N31 Ni1 135.0(2) . . ?
N31 C31 N33 173.4(3) . . ?
C32 N32 Ni1 155.9(3) . 4 ?
N32 C32 N33 174.3(3) . . ?
C31 N33 C32 121.0(3) . . ?
C41 N41 Ni1 156.7(3) . . ?
N41 C41 N43 172.6(3) . . ?
C42 N42 Ni2 167.6(3) . 3 ?
N42 C42 N43 170.9(3) . . ?
C42 N43 C41 124.0(3) . . ?
C51 N51 Ni2 158.2(3) . . ?
N51 C51 N53 174.5(3) . . ?
C52 N52 Ni2 129.7(2) . 4_556 ?
N52 C52 N53 172.1(3) . . ?
C52 N53 C51 121.7(3) . . ?
C61 N61 Ni2 157.3(2) . . ?
N61 C61 N63 172.0(3) . . ?
C62 N62 Ni1 167.4(3) . 3 ?
N62 C62 N63 170.2(3) . . ?
C61 N63 C62 124.3(3) . . ?
C140 P1 C111 111.18(15) . . ?
C140 P1 C121 106.69(15) . . ?
C111 P1 C121 109.70(14) . . ?
C140 P1 C131 109.45(14) . . ?
C111 P1 C131 108.43(15) . . ?
C121 P1 C131 111.41(15) . . ?
C112 C111 C116 119.3(3) . . ?
C112 C111 P1 120.7(2) . . ?
C116 C111 P1 119.8(2) . . ?
C113 C112 C111 120.4(3) . . ?
C112 C113 C114 119.9(3) . . ?
C113 C114 C115 120.4(3) . . ?
C116 C115 C114 119.6(3) . . ?
C115 C116 C111 120.3(3) . . ?
C126 C121 C122 120.0(3) . . ?
C126 C121 P1 118.6(3) . . ?
C122 C121 P1 121.2(2) . . ?
C123 C122 C121 119.7(3) . . ?
C124 C123 C122 120.1(3) . . ?
C123 C124 C125 120.5(3) . . ?
C124 C125 C126 120.1(3) . . ?
C121 C126 C125 119.5(3) . . ?
C136 C131 C132 120.0(3) . . ?
C136 C131 P1 120.4(2) . . ?
C132 C131 P1 119.5(3) . . ?
C133 C132 C131 119.4(3) . . ?
C134 C133 C132 119.8(3) . . ?
C133 C134 C135 121.3(3) . . ?
C136 C135 C134 118.9(3) . . ?
C135 C136 C131 120.6(3) . . ?
C231 P2 C240 112.42(15) . . ?
C231 P2 C211 107.19(15) . . ?
C240 P2 C211 109.33(15) . . ?
C231 P2 C221 109.19(14) . . ?
C240 P2 C221 109.11(16) . . ?
C211 P2 C221 109.55(14) . . ?
C212 C211 C216 120.0(3) . . ?
C212 C211 P2 120.9(2) . . ?
C216 C211 P2 119.1(2) . . ?
C213 C212 C211 120.3(3) . . ?
C214 C213 C212 119.1(3) . . ?
C215 C214 C213 120.7(3) . . ?
C214 C215 C216 120.4(3) . . ?
C215 C216 C211 119.4(3) . . ?
C226 C221 C222 119.4(3) . . ?
C226 C221 P2 121.7(2) . . ?
C222 C221 P2 118.9(2) . . ?
C223 C222 C221 119.7(3) . . ?
C224 C223 C222 120.5(3) . . ?
C223 C224 C225 120.0(3) . . ?
C224 C225 C226 120.2(3) . . ?
C221 C226 C225 120.2(3) . . ?
C232 C231 C236 118.4(3) . . ?
C232 C231 P2 122.7(2) . . ?
C236 C231 P2 118.6(2) . . ?
C233 C232 C231 120.8(3) . . ?
C232 C233 C234 120.8(3) . . ?
C235 C234 C233 119.5(3) . . ?
C234 C235 C236 120.4(3) . . ?
C235 C236 C231 120.0(3) . . ?
 
_diffrn_measured_fraction_theta_max    0.998
_diffrn_reflns_theta_full              30.50
_diffrn_measured_fraction_theta_full   0.998
_refine_diff_density_max    0.871
_refine_diff_density_min   -0.536
_refine_diff_density_rms    0.107

_publ_contact_author
;
    Dr. S.R. Batten
    School of Chemistry
    Monash University 3800
    AUSTRALIA
;

_publ_contact_author_phone            ' +61 3 9905 4606 '
_publ_contact_author_fax              ' +61 3 9905 4597 '
_publ_contact_author_email            ' 
stuart.batten@sci.monash.edu.au '

loop_
_publ_author_name
_publ_author_address
'van der Werff, Patricia M.' 
; 
School of Chemistry
Monash University 3800
AUSTRALIA
;
'Batten, Stuart R.' 
; 
School of Chemistry
Monash University 3800
Australia
;
'Jensen, Paul' 
; 
Department of Chemistry
Trinity College
Dublin 2
Ireland
;
'Moubaraki, Boujemaa' 
; 
School of Chemistry
Monash University 3800
Australia
;
'Murray, Keith S.' 
; 
School of Chemistry
Monash University 3800
Australia
;
'Cashion, John D.' 
; 
School of Physics and Materials Engineering
Monash University 3800
Australia
;

_publ_section_title
;
 Structure and magnetism of 3D anionic metal dicyanamide
 (MePh3P)[M(dca)3] (M = Fe, Co, Ni) and (EtPh3P)[M(dca)3]
 (M = Mn, Co, Ni) networks
;


#=END

 
data_EtMn
  
_audit_creation_method            SHELXL-97 
_chemical_name_systematic 
; 
 Ethyltriphenylphosphonium tris(dicyanamido)mangenate(II)
; 
_chemical_name_common             ? 
_chemical_melting_point           ? 
_chemical_formula_moiety          ? 
_chemical_formula_sum 
 'C26 H20 Mn N9 P' 
_chemical_formula_weight          544.42 
  
loop_ 
 _atom_type_symbol 
 _atom_type_description 
 _atom_type_scat_dispersion_real 
 _atom_type_scat_dispersion_imag 
 _atom_type_scat_source 
 'C'  'C'   0.0033   0.0016 
 'International Tables Vol C Tables 4.2.6.8 and 6.1.1.4' 
 'H'  'H'   0.0000   0.0000 
 'International Tables Vol C Tables 4.2.6.8 and 6.1.1.4' 
 'N'  'N'   0.0061   0.0033 
 'International Tables Vol C Tables 4.2.6.8 and 6.1.1.4' 
 'P'  'P'   0.1023   0.0942 
 'International Tables Vol C Tables 4.2.6.8 and 6.1.1.4' 
 'Mn'  'Mn'   0.3368   0.7283 
 'International Tables Vol C Tables 4.2.6.8 and 6.1.1.4' 
  
_symmetry_cell_setting            Orthorhombic 
_symmetry_space_group_name_H-M    P2(1)2(1)2(1) 
  
loop_ 
 _symmetry_equiv_pos_as_xyz 
 'x, y, z' 
 '-x+1/2, -y, z+1/2' 
 'x+1/2, -y+1/2, -z' 
 '-x, y+1/2, -z+1/2' 
  
_cell_length_a                    14.3759(1) 
_cell_length_b                    16.9055(1) 
_cell_length_c                    21.6345(2) 
_cell_angle_alpha                 90.00 
_cell_angle_beta                  90.00 
_cell_angle_gamma                 90.00 
_cell_volume                      5257.87(7) 
_cell_formula_units_Z             8 
_cell_measurement_temperature     123(2) 
_cell_measurement_reflns_used     ? 
_cell_measurement_theta_min       ? 
_cell_measurement_theta_max       ? 
  
_exptl_crystal_description        block 
_exptl_crystal_colour             colourless 
_exptl_crystal_size_max           0.29 
_exptl_crystal_size_mid           0.17 
_exptl_crystal_size_min           0.11 
_exptl_crystal_density_meas       ? 
_exptl_crystal_density_diffrn     1.376 
_exptl_crystal_density_method     'not measured' 
_exptl_crystal_F_000              2232 
_exptl_absorpt_coefficient_mu     0.596 
_exptl_absorpt_correction_type    none 
_exptl_absorpt_correction_T_min   ?
_exptl_absorpt_correction_T_max   ?
_exptl_absorpt_process_details    ? 
  
_exptl_special_details 
; 
 ? 
; 
  
_diffrn_ambient_temperature       123(2) 
_diffrn_radiation_wavelength      0.71073 
_diffrn_radiation_type            MoK\a 
_diffrn_radiation_source          'fine-focus sealed tube' 
_diffrn_radiation_monochromator   graphite 
_diffrn_measurement_device_type   'Bruker P4' 
_diffrn_measurement_method        '\w scans' 
_diffrn_detector_area_resol_mean  ? 
_diffrn_standards_number          ? 
_diffrn_standards_interval_count  ? 
_diffrn_standards_interval_time   ? 
_diffrn_standards_decay_%         ? 
_diffrn_reflns_number             63658 
_diffrn_reflns_av_R_equivalents   0.0397 
_diffrn_reflns_av_sigmaI/netI     0.0399 
_diffrn_reflns_limit_h_min        -19 
_diffrn_reflns_limit_h_max        19 
_diffrn_reflns_limit_k_min        -16 
_diffrn_reflns_limit_k_max        21 
_diffrn_reflns_limit_l_min        -28 
_diffrn_reflns_limit_l_max        28 
_diffrn_reflns_theta_min          3.40 
_diffrn_reflns_theta_max          28.29 
_reflns_number_total              12619 
_reflns_number_gt                 11055 
_reflns_threshold_expression      >2sigma(I) 
  
_computing_data_collection        'Bruker XSCANS' 
_computing_cell_refinement        'Bruker XSCANS' 
_computing_data_reduction         'Bruker SHELXTL' 
_computing_structure_solution     'SHELXS-97 (Sheldrick, 1990)' 
_computing_structure_refinement   'SHELXL-97 (Sheldrick, 1997)' 
_computing_molecular_graphics     'Bruker SHELXTL' 
_computing_publication_material   'Bruker SHELXTL' 
  
_refine_special_details 
; 
 Refinement of F^2^ against ALL reflections.  The weighted R-factor wR and 
 goodness of fit S are based on F^2^, conventional R-factors R are based 
 on F, with F set to zero for negative F^2^. The threshold expression of 
 F^2^ > 2sigma(F^2^) is used only for calculating R-factors(gt) etc. and is 
 not relevant to the choice of reflections for refinement.  R-factors based 
 on F^2^ are statistically about twice as large as those based on F, and R- 
 factors based on ALL data will be even larger. 
; 
  
_refine_ls_structure_factor_coef  Fsqd 
_refine_ls_matrix_type            full 
_refine_ls_weighting_scheme       calc 
_refine_ls_weighting_details 
 'calc w=1/[\s^2^(Fo^2^)+(0.0320P)^2^+0.6099P] where P=(Fo^2^+2Fc^2^)/3' 
_atom_sites_solution_primary      direct 
_atom_sites_solution_secondary    difmap 
_atom_sites_solution_hydrogens    geom 
_refine_ls_hydrogen_treatment     mixed 
_refine_ls_extinction_method      none 
_refine_ls_extinction_coef        ? 
_refine_ls_abs_structure_details 
 'Flack H D (1983), Acta Cryst. A39, 876-881' 
_refine_ls_abs_structure_Flack    -0.008(8) 
_refine_ls_number_reflns          12619 
_refine_ls_number_parameters      669 
_refine_ls_number_restraints      0 
_refine_ls_R_factor_all           0.0409 
_refine_ls_R_factor_gt            0.0310 
_refine_ls_wR_factor_ref          0.0673 
_refine_ls_wR_factor_gt           0.0639 
_refine_ls_goodness_of_fit_ref    1.022 
_refine_ls_restrained_S_all       1.022 
_refine_ls_shift/su_max           0.002 
_refine_ls_shift/su_mean          0.000 
  
loop_ 
 _atom_site_label 
 _atom_site_type_symbol 
 _atom_site_fract_x 
 _atom_site_fract_y 
 _atom_site_fract_z 
 _atom_site_U_iso_or_equiv 
 _atom_site_adp_type 
 _atom_site_occupancy 
 _atom_site_symmetry_multiplicity 
 _atom_site_calc_flag 
 _atom_site_refinement_flags 
 _atom_site_disorder_assembly 
 _atom_site_disorder_group 
Mn1 Mn -0.134364(18) 0.266983(15) 0.929762(12) 0.02028(6) Uani 1 1 d . . . 
Mn2 Mn 0.029260(18) 0.268131(15) 0.597130(12) 0.02134(6) Uani 1 1 d . . . 
N11 N -0.17540(11) 0.24525(10) 0.83291(8) 0.0339(4) Uani 1 1 d . . . 
C11 C -0.19262(13) 0.24739(12) 0.78137(9) 0.0315(4) Uani 1 1 d . . . 
N12 N -0.11043(12) 0.25275(10) 0.63893(8) 0.0371(4) Uani 1 1 d . . . 
C12 C -0.15899(13) 0.25229(11) 0.68033(9) 0.0302(4) Uani 1 1 d . . . 
N13 N -0.22175(13) 0.25231(16) 0.72431(8) 0.0605(6) Uani 1 1 d . . . 
N21 N 0.00937(11) 0.28571(9) 0.89030(8) 0.0290(4) Uani 1 1 d . . . 
C21 C 0.05678(12) 0.29346(10) 0.84729(9) 0.0225(4) Uani 1 1 d . . . 
N22 N 0.08225(12) 0.28250(9) 0.69329(8) 0.0329(4) Uani 1 1 d . . . 
C22 C 0.09436(13) 0.29050(10) 0.74561(9) 0.0252(4) Uani 1 1 d . . . 
N23 N 0.11792(11) 0.30235(10) 0.80356(8) 0.0323(4) Uani 1 1 d . . . 
N31 N -0.08818(12) 0.28122(11) 1.02794(8) 0.0363(4) Uani 1 1 d . . . 
C31 C -0.01737(14) 0.28141(10) 1.05249(8) 0.0265(4) Uani 1 1 d . . . 
N32 N 0.21323(10) 0.24893(8) 1.05106(7) 0.0276(4) Uani 1 1 d . . . 
C32 C 0.13827(13) 0.26413(12) 1.06499(9) 0.0302(4) Uani 1 1 d . . . 
N33 N 0.05678(13) 0.28472(15) 1.08638(9) 0.0612(7) Uani 1 1 d . . . 
N41 N -0.15728(12) 0.39457(9) 0.92332(9) 0.0363(4) Uani 1 1 d . . . 
C41 C -0.16389(13) 0.46166(11) 0.91466(9) 0.0302(4) Uani 1 1 d . . . 
N42 N -0.06653(13) 0.64142(10) 0.89921(9) 0.0407(4) Uani 1 1 d . . . 
C42 C -0.11717(14) 0.58903(11) 0.90223(10) 0.0331(5) Uani 1 1 d . . . 
N43 N -0.18275(12) 0.53544(9) 0.90398(11) 0.0460(5) Uani 1 1 d . . . 
N51 N 0.16888(12) 0.28722(10) 0.55574(8) 0.0344(4) Uani 1 1 d . . . 
C51 C 0.24724(14) 0.29819(11) 0.55070(10) 0.0332(5) Uani 1 1 d . . . 
N52 N 0.45769(11) 0.25093(10) 0.49248(8) 0.0328(4) Uani 1 1 d . . . 
C52 C 0.39621(13) 0.27885(11) 0.51765(9) 0.0284(4) Uani 1 1 d . . . 
N53 N 0.33529(14) 0.31750(13) 0.55019(12) 0.0634(7) Uani 1 1 d . . . 
N61 N 0.00770(12) 0.39773(9) 0.58447(8) 0.0341(4) Uani 1 1 d . . . 
C61 C 0.03758(13) 0.45097(10) 0.55701(8) 0.0262(4) Uani 1 1 d . . . 
N62 N 0.10781(11) 0.64049(9) 0.55539(8) 0.0313(4) Uani 1 1 d . . . 
C62 C 0.08913(13) 0.57662(11) 0.54199(9) 0.0251(4) Uani 1 1 d . . . 
N63 N 0.06952(12) 0.50589(9) 0.52043(7) 0.0303(4) Uani 1 1 d . . . 
P1 P 0.13029(3) 0.46826(3) 0.31424(2) 0.02266(10) Uani 1 1 d . . . 
C111 C 0.02456(13) 0.52482(10) 0.31703(8) 0.0238(4) Uani 1 1 d . . . 
C112 C -0.01408(13) 0.55426(10) 0.26293(8) 0.0253(4) Uani 1 1 d . . . 
H112 H 0.0172 0.5470 0.2247 0.030 Uiso 1 1 calc R . . 
C113 C -0.09803(14) 0.59411(11) 0.26456(10) 0.0307(4) Uani 1 1 d . . . 
H113 H -0.1238 0.6149 0.2275 0.037 Uiso 1 1 calc R . . 
C114 C -0.14456(14) 0.60380(12) 0.31988(10) 0.0350(5) Uani 1 1 d . . . 
H114 H -0.2025 0.6309 0.3208 0.042 Uiso 1 1 calc R . . 
C115 C -0.10688(14) 0.57414(12) 0.37379(10) 0.0365(5) Uani 1 1 d . . . 
H115 H -0.1392 0.5809 0.4117 0.044 Uiso 1 1 calc R . . 
C116 C -0.02210(14) 0.53451(12) 0.37315(9) 0.0324(4) Uani 1 1 d . . . 
H116 H 0.0037 0.5143 0.4104 0.039 Uiso 1 1 calc R . . 
C121 C 0.17879(12) 0.48135(10) 0.23866(8) 0.0229(4) Uani 1 1 d . . . 
C122 C 0.22715(13) 0.55139(11) 0.22659(9) 0.0286(4) Uani 1 1 d . . . 
H122 H 0.2397 0.5876 0.2591 0.034 Uiso 1 1 calc R . . 
C123 C 0.25657(14) 0.56772(12) 0.16732(9) 0.0331(4) Uani 1 1 d . . . 
H123 H 0.2892 0.6154 0.1591 0.040 Uiso 1 1 calc R . . 
C124 C 0.23890(14) 0.51529(11) 0.11987(9) 0.0324(4) Uani 1 1 d . . . 
H124 H 0.2585 0.5272 0.0790 0.039 Uiso 1 1 calc R . . 
C125 C 0.19275(16) 0.44559(12) 0.13195(9) 0.0388(5) Uani 1 1 d . . . 
H125 H 0.1819 0.4091 0.0993 0.047 Uiso 1 1 calc R . . 
C126 C 0.16202(15) 0.42807(11) 0.19102(9) 0.0344(5) Uani 1 1 d . . . 
H126 H 0.1298 0.3801 0.1989 0.041 Uiso 1 1 calc R . . 
C131 C 0.21211(13) 0.50298(11) 0.37027(8) 0.0263(4) Uani 1 1 d . . . 
C132 C 0.20547(14) 0.57807(11) 0.39624(9) 0.0291(4) Uani 1 1 d . . . 
H132 H 0.1540 0.6111 0.3865 0.035 Uiso 1 1 calc R . . 
C133 C 0.27378(15) 0.60475(13) 0.43628(10) 0.0385(5) Uani 1 1 d . . . 
H133 H 0.2688 0.6558 0.4543 0.046 Uiso 1 1 calc R . . 
C134 C 0.34900(16) 0.55720(15) 0.45008(10) 0.0440(6) Uani 1 1 d . . . 
H134 H 0.3963 0.5762 0.4769 0.053 Uiso 1 1 calc R . . 
C135 C 0.35605(15) 0.48191(14) 0.42502(11) 0.0459(6) Uani 1 1 d . . . 
H135 H 0.4075 0.4491 0.4351 0.055 Uiso 1 1 calc R . . 
C136 C 0.28779(15) 0.45481(13) 0.38529(10) 0.0372(5) Uani 1 1 d . . . 
H136 H 0.2924 0.4032 0.3681 0.045 Uiso 1 1 calc R . . 
C140 C 0.10411(15) 0.36551(11) 0.32707(10) 0.0329(5) Uani 1 1 d . . . 
H14A H 0.0547 0.3492 0.2979 0.039 Uiso 1 1 calc R . . 
H14B H 0.1602 0.3338 0.3176 0.039 Uiso 1 1 calc R . . 
C141 C 0.07226(18) 0.34631(13) 0.39306(11) 0.0472(6) Uani 1 1 d . . . 
H14C H 0.1181 0.3666 0.4226 0.071 Uiso 1 1 calc R . . 
H14D H 0.0665 0.2889 0.3979 0.071 Uiso 1 1 calc R . . 
H14E H 0.0118 0.3712 0.4008 0.071 Uiso 1 1 calc R . . 
P2 P 0.23016(3) 0.08243(3) 0.84173(2) 0.02164(10) Uani 1 1 d . . . 
C211 C 0.29821(13) 0.00140(10) 0.87110(8) 0.0239(4) Uani 1 1 d . . . 
C212 C 0.39276(14) 0.01123(12) 0.88135(9) 0.0321(4) Uani 1 1 d . . . 
H212 H 0.4233 0.0579 0.8678 0.038 Uiso 1 1 calc R . . 
C213 C 0.44264(16) -0.04790(13) 0.91174(10) 0.0427(5) Uani 1 1 d . . . 
H213 H 0.5076 -0.0421 0.9183 0.051 Uiso 1 1 calc R . . 
C214 C 0.39745(17) -0.11463(13) 0.93213(11) 0.0450(6) Uani 1 1 d . . . 
H214 H 0.4314 -0.1542 0.9537 0.054 Uiso 1 1 calc R . . 
C215 C 0.30366(17) -0.12501(12) 0.92175(10) 0.0411(5) Uani 1 1 d . . . 
H215 H 0.2738 -0.1720 0.9353 0.049 Uiso 1 1 calc R . . 
C216 C 0.25296(15) -0.06717(11) 0.89163(9) 0.0316(4) Uani 1 1 d . . . 
H216 H 0.1881 -0.0738 0.8849 0.038 Uiso 1 1 calc R . . 
C221 C 0.29516(12) 0.14217(10) 0.78790(9) 0.0253(4) Uani 1 1 d . . . 
C222 C 0.28452(15) 0.13149(13) 0.72486(10) 0.0368(5) Uani 1 1 d . . . 
H222 H 0.2453 0.0906 0.7098 0.044 Uiso 1 1 calc R . . 
C223 C 0.33097(16) 0.18038(14) 0.68368(11) 0.0441(5) Uani 1 1 d . . . 
H223 H 0.3237 0.1730 0.6404 0.053 Uiso 1 1 calc R . . 
C224 C 0.38821(15) 0.24018(13) 0.70579(11) 0.0405(5) Uani 1 1 d . . . 
H224 H 0.4192 0.2743 0.6777 0.049 Uiso 1 1 calc R . . 
C225 C 0.39993(16) 0.24994(13) 0.76822(11) 0.0442(6) Uani 1 1 d . . . 
H225 H 0.4403 0.2902 0.7831 0.053 Uiso 1 1 calc R . . 
C226 C 0.35353(15) 0.20168(12) 0.80986(11) 0.0387(5) Uani 1 1 d . . . 
H226 H 0.3615 0.2091 0.8531 0.046 Uiso 1 1 calc R . . 
C231 C 0.12812(12) 0.04480(10) 0.80398(8) 0.0225(4) Uani 1 1 d . . . 
C232 C 0.13596(14) -0.02060(10) 0.76497(9) 0.0278(4) Uani 1 1 d . . . 
H232 H 0.1939 -0.0471 0.7609 0.033 Uiso 1 1 calc R . . 
C233 C 0.05936(14) -0.04655(12) 0.73242(9) 0.0323(5) Uani 1 1 d . . . 
H233 H 0.0648 -0.0905 0.7053 0.039 Uiso 1 1 calc R . . 
C234 C -0.02497(14) -0.00899(11) 0.73912(10) 0.0343(5) Uani 1 1 d . . . 
H234 H -0.0775 -0.0273 0.7167 0.041 Uiso 1 1 calc R . . 
C235 C -0.03383(14) 0.05554(11) 0.77843(10) 0.0334(5) Uani 1 1 d . . . 
H235 H -0.0925 0.0807 0.7832 0.040 Uiso 1 1 calc R . . 
C236 C 0.04252(13) 0.08307(11) 0.81060(9) 0.0281(4) Uani 1 1 d . . . 
H236 H 0.0369 0.1277 0.8370 0.034 Uiso 1 1 calc R . . 
C240 C 0.19896(13) 0.14184(10) 0.90754(9) 0.0271(4) Uani 1 1 d . . . 
H24A H 0.2560 0.1652 0.9256 0.033 Uiso 1 1 calc R . . 
H24B H 0.1584 0.1858 0.8938 0.033 Uiso 1 1 calc R . . 
C241 C 0.14838(15) 0.09386(12) 0.95716(10) 0.0350(5) Uani 1 1 d . . . 
H24C H 0.1007 0.0607 0.9377 0.053 Uiso 1 1 calc R . . 
H24D H 0.1188 0.1299 0.9867 0.053 Uiso 1 1 calc R . . 
H24E H 0.1931 0.0602 0.9789 0.053 Uiso 1 1 calc R . . 
  
loop_ 
 _atom_site_aniso_label 
 _atom_site_aniso_U_11 
 _atom_site_aniso_U_22 
 _atom_site_aniso_U_33 
 _atom_site_aniso_U_23 
 _atom_site_aniso_U_13 
 _atom_site_aniso_U_12 
Mn1 0.01968(13) 0.01727(12) 0.02390(13) 0.00066(10) 0.00018(11) 0.00083(10) 
Mn2 0.02199(13) 0.01717(13) 0.02488(13) -0.00222(11) 0.00115(11) 0.00025(11) 
N11 0.0320(9) 0.0405(10) 0.0293(9) -0.0011(7) -0.0010(7) -0.0005(7) 
C11 0.0207(9) 0.0437(13) 0.0300(11) -0.0056(8) 0.0024(8) -0.0049(8) 
N12 0.0326(9) 0.0464(11) 0.0322(9) 0.0015(7) 0.0064(8) -0.0030(8) 
C12 0.0247(10) 0.0361(12) 0.0299(10) -0.0011(8) -0.0027(8) -0.0090(8) 
N13 0.0252(9) 0.129(2) 0.0271(10) -0.0040(11) 0.0021(8) -0.0118(12) 
N21 0.0241(8) 0.0301(9) 0.0330(9) 0.0013(6) 0.0029(7) -0.0004(6) 
C21 0.0205(9) 0.0174(9) 0.0297(10) 0.0014(7) -0.0061(8) -0.0002(6) 
N22 0.0366(10) 0.0324(10) 0.0297(9) -0.0011(7) -0.0013(8) -0.0009(7) 
C22 0.0223(9) 0.0208(9) 0.0326(11) 0.0032(7) 0.0006(8) -0.0026(7) 
N23 0.0241(9) 0.0469(10) 0.0258(9) 0.0029(7) -0.0004(7) -0.0071(7) 
N31 0.0273(9) 0.0524(11) 0.0292(9) -0.0087(8) -0.0019(7) 0.0088(8) 
C31 0.0275(10) 0.0281(10) 0.0240(9) -0.0052(7) 0.0049(8) 0.0020(8) 
N32 0.0210(8) 0.0258(9) 0.0360(9) 0.0014(6) -0.0016(7) -0.0006(6) 
C32 0.0269(10) 0.0333(10) 0.0305(10) -0.0032(8) -0.0035(8) -0.0032(8) 
N33 0.0220(9) 0.1170(19) 0.0446(12) -0.0324(12) -0.0060(8) 0.0104(10) 
N41 0.0329(10) 0.0204(9) 0.0556(12) 0.0023(7) 0.0016(8) -0.0015(7) 
C41 0.0261(10) 0.0256(12) 0.0389(12) -0.0024(8) -0.0032(8) -0.0030(8) 
N42 0.0477(11) 0.0204(9) 0.0541(12) 0.0044(8) -0.0059(9) -0.0033(8) 
C42 0.0381(12) 0.0180(10) 0.0433(12) -0.0004(8) -0.0084(10) 0.0039(9) 
N43 0.0343(10) 0.0169(9) 0.0868(15) 0.0038(9) -0.0105(10) -0.0001(7) 
N51 0.0266(9) 0.0392(10) 0.0373(10) -0.0060(7) 0.0037(7) 0.0002(7) 
C51 0.0286(11) 0.0345(11) 0.0367(12) -0.0084(8) 0.0053(9) 0.0034(8) 
N52 0.0247(9) 0.0428(10) 0.0311(9) -0.0086(7) 0.0009(7) -0.0013(7) 
C52 0.0247(10) 0.0321(11) 0.0282(10) -0.0045(8) 0.0001(8) -0.0053(8) 
N53 0.0313(11) 0.0682(14) 0.0908(18) -0.0426(13) 0.0207(11) -0.0109(10) 
N61 0.0397(10) 0.0208(8) 0.0419(11) 0.0001(7) -0.0001(8) -0.0001(7) 
C61 0.0291(10) 0.0196(10) 0.0298(10) -0.0066(8) -0.0082(8) 0.0050(8) 
N62 0.0306(9) 0.0252(9) 0.0381(10) -0.0034(7) 0.0017(7) -0.0032(7) 
C62 0.0236(10) 0.0246(11) 0.0271(10) 0.0019(8) -0.0009(8) 0.0017(7) 
N63 0.0424(10) 0.0191(8) 0.0294(9) -0.0008(6) -0.0026(7) -0.0033(7) 
P1 0.0238(2) 0.0202(2) 0.0240(2) -0.00009(17) 0.0037(2) 0.00027(18) 
C111 0.0229(9) 0.0217(9) 0.0267(9) -0.0052(7) 0.0020(8) -0.0025(7) 
C112 0.0238(9) 0.0283(10) 0.0238(9) -0.0040(7) -0.0008(8) -0.0035(7) 
C113 0.0286(10) 0.0303(10) 0.0331(11) -0.0038(8) -0.0080(9) 0.0004(8) 
C114 0.0240(10) 0.0404(12) 0.0405(12) -0.0106(9) -0.0024(9) 0.0066(8) 
C115 0.0286(11) 0.0482(12) 0.0327(11) -0.0079(9) 0.0078(9) 0.0060(9) 
C116 0.0293(11) 0.0435(12) 0.0244(10) 0.0003(8) 0.0005(8) 0.0022(9) 
C121 0.0216(9) 0.0215(9) 0.0257(9) -0.0003(7) 0.0043(8) 0.0022(7) 
C122 0.0278(10) 0.0293(10) 0.0286(10) -0.0020(8) 0.0013(8) -0.0044(8) 
C123 0.0311(11) 0.0346(11) 0.0335(11) 0.0052(8) 0.0025(9) -0.0083(8) 
C124 0.0342(11) 0.0372(11) 0.0259(10) 0.0023(8) 0.0082(9) 0.0074(9) 
C125 0.0571(15) 0.0315(11) 0.0279(11) -0.0091(8) 0.0096(10) -0.0010(10) 
C126 0.0479(13) 0.0223(10) 0.0331(11) -0.0043(8) 0.0088(10) -0.0035(9) 
C131 0.0235(9) 0.0319(10) 0.0235(9) 0.0021(7) 0.0035(8) -0.0001(8) 
C132 0.0317(11) 0.0299(10) 0.0259(10) 0.0002(8) 0.0023(8) -0.0012(8) 
C133 0.0420(13) 0.0442(12) 0.0294(11) -0.0057(9) 0.0037(10) -0.0113(9) 
C134 0.0337(13) 0.0688(16) 0.0296(12) 0.0004(10) -0.0037(9) -0.0134(11) 
C135 0.0297(12) 0.0644(15) 0.0434(13) 0.0064(11) -0.0056(10) 0.0066(10) 
C136 0.0347(12) 0.0380(11) 0.0390(12) -0.0002(9) -0.0009(10) 0.0095(9) 
C140 0.0357(11) 0.0241(10) 0.0387(12) 0.0022(8) 0.0086(9) -0.0006(8) 
C141 0.0635(16) 0.0346(12) 0.0434(14) 0.0128(10) 0.0119(12) -0.0050(10) 
P2 0.0212(2) 0.0195(2) 0.0243(2) -0.00138(17) -0.00408(19) 0.00049(17) 
C211 0.0266(10) 0.0235(9) 0.0215(9) -0.0029(7) -0.0022(8) 0.0050(7) 
C212 0.0282(11) 0.0350(11) 0.0329(11) -0.0058(8) -0.0069(8) 0.0057(8) 
C213 0.0375(12) 0.0493(14) 0.0413(13) -0.0074(10) -0.0133(10) 0.0145(10) 
C214 0.0584(15) 0.0384(13) 0.0381(12) -0.0016(10) -0.0149(11) 0.0236(11) 
C215 0.0556(15) 0.0272(11) 0.0404(13) 0.0059(9) -0.0031(11) 0.0094(9) 
C216 0.0338(11) 0.0262(10) 0.0348(12) 0.0012(8) 0.0007(9) 0.0035(8) 
C221 0.0224(9) 0.0224(9) 0.0312(10) 0.0027(7) -0.0039(8) 0.0008(7) 
C222 0.0369(12) 0.0395(11) 0.0340(11) 0.0006(9) -0.0033(9) -0.0077(9) 
C223 0.0437(13) 0.0569(14) 0.0317(12) 0.0096(10) -0.0004(10) -0.0082(11) 
C224 0.0364(12) 0.0345(12) 0.0505(14) 0.0144(10) 0.0053(10) -0.0015(9) 
C225 0.0448(13) 0.0355(13) 0.0524(14) 0.0034(9) 0.0028(11) -0.0164(10) 
C226 0.0427(13) 0.0365(11) 0.0369(12) -0.0014(9) -0.0048(10) -0.0124(9) 
C231 0.0226(9) 0.0200(9) 0.0250(9) -0.0004(7) -0.0034(8) -0.0022(7) 
C232 0.0236(9) 0.0273(10) 0.0325(10) -0.0053(7) -0.0001(9) -0.0015(8) 
C233 0.0348(11) 0.0290(11) 0.0331(11) -0.0082(8) -0.0031(9) -0.0073(8) 
C234 0.0281(10) 0.0354(11) 0.0396(12) -0.0004(9) -0.0095(9) -0.0085(9) 
C235 0.0240(10) 0.0300(11) 0.0462(12) 0.0016(9) -0.0075(9) 0.0016(8) 
C236 0.0279(10) 0.0226(10) 0.0339(11) -0.0019(8) -0.0044(8) 0.0015(7) 
C240 0.0283(10) 0.0232(9) 0.0298(10) -0.0075(7) -0.0047(8) 0.0030(7) 
C241 0.0372(12) 0.0367(11) 0.0312(11) -0.0096(8) 0.0012(9) -0.0003(9) 
  
_geom_special_details 
; 
 All esds (except the esd in the dihedral angle between two l.s. planes) 
 are estimated using the full covariance matrix.  The cell esds are taken 
 into account individually in the estimation of esds in distances, angles 
 and torsion angles; correlations between esds in cell parameters are only 
 used when they are defined by crystal symmetry.  An approximate (isotropic) 
 treatment of cell esds is used for estimating esds involving l.s. planes. 
; 
  
loop_ 
 _geom_bond_atom_site_label_1 
 _geom_bond_atom_site_label_2 
 _geom_bond_distance 
 _geom_bond_site_symmetry_2 
 _geom_bond_publ_flag 
Mn1 N41 2.1864(16) . ? 
Mn1 N62 2.1959(16) 4_546 ? 
Mn1 N11 2.2076(17) . ? 
Mn1 N31 2.2384(17) . ? 
Mn1 N32 2.2461(15) 3_457 ? 
Mn1 N21 2.2580(16) . ? 
Mn2 N42 2.2095(17) 4_546 ? 
Mn2 N12 2.2177(17) . ? 
Mn2 N52 2.2184(16) 3_456 ? 
Mn2 N51 2.2214(17) . ? 
Mn2 N22 2.2288(17) . ? 
Mn2 N61 2.2296(16) . ? 
N11 C11 1.143(2) . ? 
C11 N13 1.306(3) . ? 
N12 C12 1.136(2) . ? 
C12 N13 1.311(3) . ? 
N21 C21 1.161(2) . ? 
C21 N23 1.300(2) . ? 
N22 C22 1.153(2) . ? 
C22 N23 1.314(3) . ? 
N31 C31 1.148(2) . ? 
C31 N33 1.295(3) . ? 
N32 C32 1.148(2) . ? 
N32 Mn1 2.2461(15) 3_557 ? 
C32 N33 1.307(3) . ? 
N41 C41 1.154(2) . ? 
C41 N43 1.297(3) . ? 
N42 C42 1.148(3) . ? 
N42 Mn2 2.2095(17) 4_556 ? 
C42 N43 1.308(3) . ? 
N51 C51 1.147(3) . ? 
C51 N53 1.307(3) . ? 
N52 C52 1.140(2) . ? 
N52 Mn2 2.2184(16) 3_556 ? 
C52 N53 1.300(3) . ? 
N61 C61 1.161(2) . ? 
C61 N63 1.304(2) . ? 
N62 C62 1.150(2) . ? 
N62 Mn1 2.1959(16) 4_556 ? 
C62 N63 1.314(2) . ? 
P1 C131 1.7882(19) . ? 
P1 C121 1.7915(18) . ? 
P1 C111 1.7968(19) . ? 
P1 C140 1.7988(19) . ? 
C111 C112 1.388(3) . ? 
C111 C116 1.397(3) . ? 
C112 C113 1.383(3) . ? 
C113 C114 1.381(3) . ? 
C114 C115 1.380(3) . ? 
C115 C116 1.391(3) . ? 
C121 C126 1.390(3) . ? 
C121 C122 1.398(2) . ? 
C122 C123 1.378(3) . ? 
C123 C124 1.380(3) . ? 
C124 C125 1.377(3) . ? 
C125 C126 1.384(3) . ? 
C131 C132 1.392(3) . ? 
C131 C136 1.397(3) . ? 
C132 C133 1.385(3) . ? 
C133 C134 1.380(3) . ? 
C134 C135 1.387(3) . ? 
C135 C136 1.383(3) . ? 
C140 C141 1.534(3) . ? 
P2 C231 1.7954(18) . ? 
P2 C240 1.7993(18) . ? 
P2 C211 1.7992(18) . ? 
P2 C221 1.8025(19) . ? 
C211 C212 1.387(3) . ? 
C211 C216 1.402(3) . ? 
C212 C213 1.395(3) . ? 
C213 C214 1.375(3) . ? 
C214 C215 1.378(3) . ? 
C215 C216 1.383(3) . ? 
C221 C222 1.384(3) . ? 
C221 C226 1.393(3) . ? 
C222 C223 1.387(3) . ? 
C223 C224 1.388(3) . ? 
C224 C225 1.371(3) . ? 
C225 C226 1.387(3) . ? 
C231 C232 1.395(2) . ? 
C231 C236 1.398(3) . ? 
C232 C233 1.379(3) . ? 
C233 C234 1.376(3) . ? 
C234 C235 1.389(3) . ? 
C235 C236 1.381(3) . ? 
C240 C241 1.529(3) . ? 
  
loop_ 
 _geom_angle_atom_site_label_1 
 _geom_angle_atom_site_label_2 
 _geom_angle_atom_site_label_3 
 _geom_angle 
 _geom_angle_site_symmetry_1 
 _geom_angle_site_symmetry_3 
 _geom_angle_publ_flag 
N41 Mn1 N62 175.03(7) . 4_546 ? 
N41 Mn1 N11 93.64(7) . . ? 
N62 Mn1 N11 91.33(6) 4_546 . ? 
N41 Mn1 N31 89.95(7) . . ? 
N62 Mn1 N31 85.08(6) 4_546 . ? 
N11 Mn1 N31 176.23(6) . . ? 
N41 Mn1 N32 89.02(6) . 3_457 ? 
N62 Mn1 N32 91.49(6) 4_546 3_457 ? 
N11 Mn1 N32 83.96(6) . 3_457 ? 
N31 Mn1 N32 97.30(6) . 3_457 ? 
N41 Mn1 N21 88.59(6) . . ? 
N62 Mn1 N21 91.88(6) 4_546 . ? 
N11 Mn1 N21 84.78(6) . . ? 
N31 Mn1 N21 94.15(6) . . ? 
N32 Mn1 N21 168.31(6) 3_457 . ? 
N42 Mn2 N12 95.24(7) 4_546 . ? 
N42 Mn2 N52 90.17(7) 4_546 3_456 ? 
N12 Mn2 N52 85.37(6) . 3_456 ? 
N42 Mn2 N51 86.34(7) 4_546 . ? 
N12 Mn2 N51 178.37(6) . . ? 
N52 Mn2 N51 95.05(6) 3_456 . ? 
N42 Mn2 N22 89.39(7) 4_546 . ? 
N12 Mn2 N22 86.66(6) . . ? 
N52 Mn2 N22 171.94(6) 3_456 . ? 
N51 Mn2 N22 92.95(6) . . ? 
N42 Mn2 N61 172.21(7) 4_546 . ? 
N12 Mn2 N61 92.26(6) . . ? 
N52 Mn2 N61 88.33(6) 3_456 . ? 
N51 Mn2 N61 86.18(6) . . ? 
N22 Mn2 N61 93.16(6) . . ? 
C11 N11 Mn1 168.17(16) . . ? 
N11 C11 N13 173.5(2) . . ? 
C12 N12 Mn2 151.53(16) . . ? 
N12 C12 N13 174.4(2) . . ? 
C11 N13 C12 117.72(18) . . ? 
C21 N21 Mn1 148.89(14) . . ? 
N21 C21 N23 173.37(19) . . ? 
C22 N22 Mn2 168.70(16) . . ? 
N22 C22 N23 173.4(2) . . ? 
C21 N23 C22 120.16(17) . . ? 
C31 N31 Mn1 134.61(15) . . ? 
N31 C31 N33 172.7(2) . . ? 
C32 N32 Mn1 153.37(15) . 3_557 ? 
N32 C32 N33 173.7(2) . . ? 
C31 N33 C32 121.73(18) . . ? 
C41 N41 Mn1 173.11(17) . . ? 
N41 C41 N43 172.6(2) . . ? 
C42 N42 Mn2 154.08(17) . 4_556 ? 
N42 C42 N43 173.1(2) . . ? 
C41 N43 C42 121.36(18) . . ? 
C51 N51 Mn2 161.69(17) . . ? 
N51 C51 N53 172.9(2) . . ? 
C52 N52 Mn2 146.81(16) . 3_556 ? 
N52 C52 N53 171.4(2) . . ? 
C52 N53 C51 122.10(19) . . ? 
C61 N61 Mn2 140.66(15) . . ? 
N61 C61 N63 173.36(19) . . ? 
C62 N62 Mn1 172.76(16) . 4_556 ? 
N62 C62 N63 173.8(2) . . ? 
C61 N63 C62 120.54(17) . . ? 
C131 P1 C121 108.80(8) . . ? 
C131 P1 C111 111.04(8) . . ? 
C121 P1 C111 107.11(8) . . ? 
C131 P1 C140 110.49(9) . . ? 
C121 P1 C140 109.97(9) . . ? 
C111 P1 C140 109.38(9) . . ? 
C112 C111 C116 119.92(17) . . ? 
C112 C111 P1 120.07(14) . . ? 
C116 C111 P1 119.86(14) . . ? 
C113 C112 C111 120.17(17) . . ? 
C114 C113 C112 120.18(19) . . ? 
C115 C114 C113 119.94(18) . . ? 
C114 C115 C116 120.70(19) . . ? 
C115 C116 C111 119.07(18) . . ? 
C126 C121 C122 119.79(17) . . ? 
C126 C121 P1 121.96(14) . . ? 
C122 C121 P1 117.95(14) . . ? 
C123 C122 C121 119.75(18) . . ? 
C122 C123 C124 120.46(18) . . ? 
C125 C124 C123 119.82(18) . . ? 
C124 C125 C126 120.79(18) . . ? 
C125 C126 C121 119.38(18) . . ? 
C132 C131 C136 119.42(18) . . ? 
C132 C131 P1 121.87(15) . . ? 
C136 C131 P1 118.59(15) . . ? 
C133 C132 C131 120.06(19) . . ? 
C134 C133 C132 120.1(2) . . ? 
C133 C134 C135 120.5(2) . . ? 
C136 C135 C134 119.7(2) . . ? 
C135 C136 C131 120.3(2) . . ? 
C141 C140 P1 114.22(15) . . ? 
C231 P2 C240 110.73(9) . . ? 
C231 P2 C211 109.58(8) . . ? 
C240 P2 C211 106.32(9) . . ? 
C231 P2 C221 109.16(8) . . ? 
C240 P2 C221 109.13(9) . . ? 
C211 P2 C221 111.90(8) . . ? 
C212 C211 C216 120.21(17) . . ? 
C212 C211 P2 119.87(14) . . ? 
C216 C211 P2 119.30(14) . . ? 
C211 C212 C213 119.6(2) . . ? 
C214 C213 C212 119.8(2) . . ? 
C213 C214 C215 121.0(2) . . ? 
C214 C215 C216 120.2(2) . . ? 
C215 C216 C211 119.3(2) . . ? 
C222 C221 C226 119.78(19) . . ? 
C222 C221 P2 120.41(14) . . ? 
C226 C221 P2 119.76(15) . . ? 
C221 C222 C223 120.1(2) . . ? 
C222 C223 C224 119.9(2) . . ? 
C225 C224 C223 120.0(2) . . ? 
C224 C225 C226 120.7(2) . . ? 
C225 C226 C221 119.5(2) . . ? 
C232 C231 C236 119.99(17) . . ? 
C232 C231 P2 119.32(14) . . ? 
C236 C231 P2 120.58(13) . . ? 
C233 C232 C231 119.77(18) . . ? 
C234 C233 C232 120.19(18) . . ? 
C233 C234 C235 120.51(18) . . ? 
C236 C235 C234 120.03(19) . . ? 
C235 C236 C231 119.49(17) . . ? 
C241 C240 P2 112.21(13) . . ? 
  
_diffrn_measured_fraction_theta_max    0.972 
_diffrn_reflns_theta_full              27.50 
_diffrn_measured_fraction_theta_full   0.990 
_refine_diff_density_max    0.311 
_refine_diff_density_min   -0.264 
_refine_diff_density_rms    0.045 

_publ_contact_author
;
    Dr. S.R. Batten
    School of Chemistry
    Monash University 3800
    AUSTRALIA
;

_publ_contact_author_phone            ' +61 3 9905 4606 '
_publ_contact_author_fax              ' +61 3 9905 4597 '
_publ_contact_author_email            ' 
stuart.batten@sci.monash.edu.au '

loop_
_publ_author_name
_publ_author_address
'van der Werff, Patricia M.' 
; 
School of Chemistry
Monash University 3800
AUSTRALIA
;
'Batten, Stuart R.' 
; 
School of Chemistry
Monash University 3800
Australia
;
'Jensen, Paul' 
; 
Department of Chemistry
Trinity College
Dublin 2
Ireland
;
'Moubaraki, Boujemaa' 
; 
School of Chemistry
Monash University 3800
Australia
;
'Murray, Keith S.' 
; 
School of Chemistry
Monash University 3800
Australia
;
'Cashion, John D.' 
; 
School of Physics and Materials Engineering
Monash University 3800
Australia
;

_publ_section_title
;
 Structure and magnetism of 3D anionic metal dicyanamide
 (MePh3P)[M(dca)3] (M = Fe, Co, Ni) and (EtPh3P)[M(dca)3]
 (M = Mn, Co, Ni) networks
;


#=END

 
data_EtCo
  
_audit_creation_method            SHELXL-97 
_chemical_name_systematic 
; 
 Ethyltriphenylphosphonium tris(dicyanamido)cobaltate(II)
; 
_chemical_name_common             ? 
_chemical_melting_point           ? 
_chemical_formula_moiety          ? 
_chemical_formula_sum 
 'C26 H20 Co N9 P' 
_chemical_formula_weight          548.41 
  
loop_ 
 _atom_type_symbol 
 _atom_type_description 
 _atom_type_scat_dispersion_real 
 _atom_type_scat_dispersion_imag 
 _atom_type_scat_source 
 'C'  'C'   0.0033   0.0016 
 'International Tables Vol C Tables 4.2.6.8 and 6.1.1.4' 
 'H'  'H'   0.0000   0.0000 
 'International Tables Vol C Tables 4.2.6.8 and 6.1.1.4' 
 'N'  'N'   0.0061   0.0033 
 'International Tables Vol C Tables 4.2.6.8 and 6.1.1.4' 
 'P'  'P'   0.1023   0.0942 
 'International Tables Vol C Tables 4.2.6.8 and 6.1.1.4' 
 'Co'  'Co'   0.3494   0.9721 
 'International Tables Vol C Tables 4.2.6.8 and 6.1.1.4' 
  
_symmetry_cell_setting            Orthorhombic 
_symmetry_space_group_name_H-M    P2(1)2(1)2(1) 
  
loop_ 
 _symmetry_equiv_pos_as_xyz 
 'x, y, z' 
 '-x+1/2, -y, z+1/2' 
 'x+1/2, -y+1/2, -z' 
 '-x, y+1/2, -z+1/2' 
  
_cell_length_a                    14.2228(2) 
_cell_length_b                    16.7050(1) 
_cell_length_c                    21.6020(3) 
_cell_angle_alpha                 90.00 
_cell_angle_beta                  90.00 
_cell_angle_gamma                 90.00 
_cell_volume                      5132.46(11) 
_cell_formula_units_Z             8 
_cell_measurement_temperature     123(2) 
_cell_measurement_reflns_used     ? 
_cell_measurement_theta_min       ? 
_cell_measurement_theta_max       ? 
  
_exptl_crystal_description        needle 
_exptl_crystal_colour             'pink/purple' 
_exptl_crystal_size_max           0.25 
_exptl_crystal_size_mid           0.08 
_exptl_crystal_size_min           0.05 
_exptl_crystal_density_meas       ? 
_exptl_crystal_density_diffrn     1.419 
_exptl_crystal_density_method     'not measured' 
_exptl_crystal_F_000              2248 
_exptl_absorpt_coefficient_mu     0.765 
_exptl_absorpt_correction_type    none 
_exptl_absorpt_correction_T_min   ? 
_exptl_absorpt_correction_T_max   ?
_exptl_absorpt_process_details    ? 
  
_exptl_special_details 
; 
 ? 
; 
  
_diffrn_ambient_temperature       123(2) 
_diffrn_radiation_wavelength      0.71073 
_diffrn_radiation_type            MoK\a 
_diffrn_radiation_source          'fine-focus sealed tube' 
_diffrn_radiation_monochromator   graphite 
_diffrn_measurement_device_type   'Bruker P4' 
_diffrn_measurement_method        '\w scans' 
_diffrn_detector_area_resol_mean  ? 
_diffrn_standards_number          ? 
_diffrn_standards_interval_count  ? 
_diffrn_standards_interval_time   ? 
_diffrn_standards_decay_%         ? 
_diffrn_reflns_number             90513 
_diffrn_reflns_av_R_equivalents   0.0993 
_diffrn_reflns_av_sigmaI/netI     0.0925 
_diffrn_reflns_limit_h_min        -19 
_diffrn_reflns_limit_h_max        19 
_diffrn_reflns_limit_k_min        -22 
_diffrn_reflns_limit_k_max        18 
_diffrn_reflns_limit_l_min        -28 
_diffrn_reflns_limit_l_max        28 
_diffrn_reflns_theta_min          1.88 
_diffrn_reflns_theta_max          28.68 
_reflns_number_total              13043 
_reflns_number_gt                 10717 
_reflns_threshold_expression      >2sigma(I) 
  
_computing_data_collection        'Bruker XSCANS' 
_computing_cell_refinement        'Bruker XSCANS' 
_computing_data_reduction         'Bruker SHELXTL' 
_computing_structure_solution     'SHELXS-97 (Sheldrick, 1990)' 
_computing_structure_refinement   'SHELXL-97 (Sheldrick, 1997)' 
_computing_molecular_graphics     'Bruker SHELXTL' 
_computing_publication_material   'Bruker SHELXTL' 
  
_refine_special_details 
; 
 Refinement of F^2^ against ALL reflections.  The weighted R-factor wR and 
 goodness of fit S are based on F^2^, conventional R-factors R are based 
 on F, with F set to zero for negative F^2^. The threshold expression of 
 F^2^ > 2sigma(F^2^) is used only for calculating R-factors(gt) etc. and is 
 not relevant to the choice of reflections for refinement.  R-factors based 
 on F^2^ are statistically about twice as large as those based on F, and R- 
 factors based on ALL data will be even larger. 
; 
  
_refine_ls_structure_factor_coef  Fsqd 
_refine_ls_matrix_type            full 
_refine_ls_weighting_scheme       calc 
_refine_ls_weighting_details 
 'calc w=1/[\s^2^(Fo^2^)+(0.0149P)^2^+2.4488P] where P=(Fo^2^+2Fc^2^)/3' 
_atom_sites_solution_primary      direct 
_atom_sites_solution_secondary    difmap 
_atom_sites_solution_hydrogens    geom 
_refine_ls_hydrogen_treatment     mixed 
_refine_ls_extinction_method      none 
_refine_ls_extinction_coef        ? 
_refine_ls_abs_structure_details 
 'Flack H D (1983), Acta Cryst. A39, 876-881' 
_refine_ls_abs_structure_Flack    -0.001(9) 
_refine_ls_number_reflns          13043 
_refine_ls_number_parameters      669 
_refine_ls_number_restraints      0 
_refine_ls_R_factor_all           0.0856 
_refine_ls_R_factor_gt            0.0600 
_refine_ls_wR_factor_ref          0.0738 
_refine_ls_wR_factor_gt           0.0698 
_refine_ls_goodness_of_fit_ref    1.087 
_refine_ls_restrained_S_all       1.087 
_refine_ls_shift/su_max           0.002 
_refine_ls_shift/su_mean          0.000 
  
loop_ 
 _atom_site_label 
 _atom_site_type_symbol 
 _atom_site_fract_x 
 _atom_site_fract_y 
 _atom_site_fract_z 
 _atom_site_U_iso_or_equiv 
 _atom_site_adp_type 
 _atom_site_occupancy 
 _atom_site_symmetry_multiplicity 
 _atom_site_calc_flag 
 _atom_site_refinement_flags 
 _atom_site_disorder_assembly 
 _atom_site_disorder_group 
Co1 Co -0.12924(2) 0.26820(2) 0.925217(15) 0.01370(8) Uani 1 1 d . . . 
Co2 Co 0.03565(2) 0.26935(2) 0.598475(15) 0.01361(8) Uani 1 1 d . . . 
N11 N -0.17347(15) 0.24429(13) 0.83416(11) 0.0209(5) Uani 1 1 d . . . 
C11 C -0.18872(18) 0.24251(16) 0.78211(13) 0.0191(6) Uani 1 1 d . . . 
N12 N -0.09495(17) 0.25904(14) 0.64324(11) 0.0252(6) Uani 1 1 d . . . 
C12 C -0.14821(19) 0.25117(15) 0.68230(13) 0.0204(6) Uani 1 1 d . . . 
N13 N -0.21429(18) 0.24062(19) 0.72374(11) 0.0422(8) Uani 1 1 d . . . 
N21 N 0.00883(16) 0.28340(13) 0.88437(11) 0.0198(5) Uani 1 1 d . . . 
C21 C 0.05906(19) 0.29146(14) 0.84271(13) 0.0147(6) Uani 1 1 d . . . 
N22 N 0.09219(16) 0.28553(13) 0.68925(11) 0.0206(5) Uani 1 1 d . . . 
C22 C 0.10233(18) 0.29083(15) 0.74187(14) 0.0169(6) Uani 1 1 d . . . 
N23 N 0.12444(17) 0.30035(14) 0.80063(11) 0.0252(6) Uani 1 1 d . . . 
N31 N -0.07557(18) 0.28746(14) 1.01630(11) 0.0258(6) Uani 1 1 d . . . 
C31 C -0.0080(2) 0.27891(16) 1.04450(12) 0.0177(6) Uani 1 1 d . . . 
N32 N 0.22527(16) 0.24495(12) 1.05076(10) 0.0197(5) Uani 1 1 d . . . 
C32 C 0.1477(2) 0.25642(16) 1.06257(12) 0.0215(6) Uani 1 1 d . . . 
N33 N 0.06192(17) 0.2698(2) 1.08267(11) 0.0426(7) Uani 1 1 d . . . 
N41 N -0.15057(16) 0.39110(13) 0.91565(11) 0.0240(6) Uani 1 1 d . . . 
C41 C -0.15833(19) 0.45925(17) 0.90907(13) 0.0216(7) Uani 1 1 d . . . 
N42 N -0.06813(17) 0.64602(13) 0.89535(12) 0.0267(6) Uani 1 1 d . . . 
C42 C -0.1164(2) 0.59080(16) 0.89800(14) 0.0237(7) Uani 1 1 d . . . 
N43 N -0.17976(18) 0.53411(14) 0.89998(15) 0.0411(8) Uani 1 1 d . . . 
N51 N 0.17091(17) 0.28285(14) 0.55724(11) 0.0225(5) Uani 1 1 d . . . 
C51 C 0.2506(2) 0.29144(16) 0.55193(14) 0.0245(7) Uani 1 1 d . . . 
N52 N 0.46090(16) 0.25128(13) 0.48445(10) 0.0202(5) Uani 1 1 d . . . 
C52 C 0.39991(19) 0.27500(18) 0.51427(13) 0.0206(6) Uani 1 1 d . . . 
N53 N 0.34108(19) 0.30786(18) 0.55262(15) 0.0512(9) Uani 1 1 d . . . 
N61 N 0.01966(17) 0.39427(13) 0.58327(11) 0.0244(6) Uani 1 1 d . . . 
C61 C 0.04615(19) 0.45067(15) 0.55732(13) 0.0182(6) Uani 1 1 d . . . 
N62 N 0.10629(16) 0.64592(13) 0.55843(11) 0.0225(6) Uani 1 1 d . . . 
C62 C 0.09053(19) 0.58088(17) 0.54387(13) 0.0179(6) Uani 1 1 d . . . 
N63 N 0.07383(17) 0.50918(13) 0.52164(11) 0.0217(6) Uani 1 1 d . . . 
P1 P 0.12786(5) 0.46670(4) 0.31264(3) 0.01657(15) Uani 1 1 d . . . 
C111 C 0.02129(19) 0.52465(15) 0.31480(13) 0.0172(6) Uani 1 1 d . . . 
C112 C -0.01619(19) 0.55443(15) 0.26014(13) 0.0185(6) Uani 1 1 d . . . 
H112 H 0.0163 0.5468 0.2222 0.022 Uiso 1 1 calc R . . 
C113 C -0.1012(2) 0.59531(16) 0.26091(14) 0.0220(7) Uani 1 1 d . . . 
H113 H -0.1266 0.6163 0.2236 0.026 Uiso 1 1 calc R . . 
C114 C -0.1487(2) 0.60531(17) 0.31593(15) 0.0262(7) Uani 1 1 d . . . 
H114 H -0.2071 0.6328 0.3165 0.031 Uiso 1 1 calc R . . 
C115 C -0.1114(2) 0.57533(17) 0.37035(14) 0.0277(7) Uani 1 1 d . . . 
H115 H -0.1448 0.5823 0.4081 0.033 Uiso 1 1 calc R . . 
C116 C -0.0261(2) 0.53523(16) 0.37068(13) 0.0231(6) Uani 1 1 d . . . 
H116 H -0.0004 0.5154 0.4083 0.028 Uiso 1 1 calc R . . 
C121 C 0.17566(19) 0.47860(15) 0.23668(12) 0.0165(6) Uani 1 1 d . . . 
C122 C 0.2238(2) 0.54912(16) 0.22306(13) 0.0213(6) Uani 1 1 d . . . 
H122 H 0.2379 0.5861 0.2552 0.026 Uiso 1 1 calc R . . 
C123 C 0.2510(2) 0.56539(17) 0.16312(13) 0.0245(7) Uani 1 1 d . . . 
H123 H 0.2841 0.6134 0.1541 0.029 Uiso 1 1 calc R . . 
C124 C 0.2302(2) 0.51200(17) 0.11611(14) 0.0259(7) Uani 1 1 d . . . 
H124 H 0.2476 0.5239 0.0747 0.031 Uiso 1 1 calc R . . 
C125 C 0.1843(2) 0.44179(17) 0.12946(14) 0.0314(8) Uani 1 1 d . . . 
H125 H 0.1714 0.4047 0.0972 0.038 Uiso 1 1 calc R . . 
C126 C 0.1567(2) 0.42448(17) 0.18913(14) 0.0278(7) Uani 1 1 d . . . 
H126 H 0.1249 0.3758 0.1979 0.033 Uiso 1 1 calc R . . 
C131 C 0.21113(19) 0.50188(16) 0.36838(12) 0.0178(6) Uani 1 1 d . . . 
C132 C 0.2045(2) 0.57781(17) 0.39450(14) 0.0245(7) Uani 1 1 d . . . 
H132 H 0.1525 0.6113 0.3849 0.029 Uiso 1 1 calc R . . 
C133 C 0.2738(2) 0.60437(19) 0.43457(14) 0.0343(8) Uani 1 1 d . . . 
H133 H 0.2690 0.6558 0.4530 0.041 Uiso 1 1 calc R . . 
C134 C 0.3498(2) 0.5563(2) 0.44770(15) 0.0376(9) Uani 1 1 d . . . 
H134 H 0.3978 0.5753 0.4745 0.045 Uiso 1 1 calc R . . 
C135 C 0.3570(2) 0.4803(2) 0.42231(15) 0.0401(8) Uani 1 1 d . . . 
H135 H 0.4094 0.4473 0.4319 0.048 Uiso 1 1 calc R . . 
C136 C 0.2877(2) 0.45304(19) 0.38304(15) 0.0309(8) Uani 1 1 d . . . 
H136 H 0.2919 0.4008 0.3659 0.037 Uiso 1 1 calc R . . 
C140 C 0.1003(2) 0.36357(16) 0.32688(14) 0.0247(7) Uani 1 1 d . . . 
H14A H 0.0514 0.3465 0.2970 0.030 Uiso 1 1 calc R . . 
H14B H 0.1572 0.3310 0.3189 0.030 Uiso 1 1 calc R . . 
C141 C 0.0653(2) 0.34559(18) 0.39271(15) 0.0376(8) Uani 1 1 d . . . 
H14C H 0.1115 0.3651 0.4229 0.056 Uiso 1 1 calc R . . 
H14D H 0.0572 0.2877 0.3977 0.056 Uiso 1 1 calc R . . 
H14E H 0.0050 0.3725 0.3995 0.056 Uiso 1 1 calc R . . 
P2 P 0.22949(5) 0.08071(4) 0.84630(3) 0.01588(15) Uani 1 1 d . . . 
C211 C 0.2958(2) -0.00283(16) 0.87569(13) 0.0188(6) Uani 1 1 d . . . 
C212 C 0.3911(2) 0.00496(17) 0.88777(14) 0.0258(7) Uani 1 1 d . . . 
H212 H 0.4240 0.0516 0.8750 0.031 Uiso 1 1 calc R . . 
C213 C 0.4382(2) -0.05580(19) 0.91860(15) 0.0357(8) Uani 1 1 d . . . 
H213 H 0.5036 -0.0511 0.9267 0.043 Uiso 1 1 calc R . . 
C214 C 0.3898(2) -0.12314(19) 0.93751(15) 0.0368(9) Uani 1 1 d . . . 
H214 H 0.4221 -0.1640 0.9595 0.044 Uiso 1 1 calc R . . 
C215 C 0.2952(2) -0.13204(17) 0.92490(15) 0.0323(8) Uani 1 1 d . . . 
H215 H 0.2630 -0.1792 0.9373 0.039 Uiso 1 1 calc R . . 
C216 C 0.2477(2) -0.07189(16) 0.89418(13) 0.0245(7) Uani 1 1 d . . . 
H216 H 0.1825 -0.0774 0.8856 0.029 Uiso 1 1 calc R . . 
C221 C 0.29678(19) 0.14195(15) 0.79406(13) 0.0189(6) Uani 1 1 d . . . 
C222 C 0.2828(2) 0.13657(18) 0.73097(14) 0.0280(7) Uani 1 1 d . . . 
H222 H 0.2409 0.0977 0.7147 0.034 Uiso 1 1 calc R . . 
C223 C 0.3303(2) 0.1881(2) 0.69137(16) 0.0354(8) Uani 1 1 d . . . 
H223 H 0.3202 0.1848 0.6480 0.042 Uiso 1 1 calc R . . 
C224 C 0.3922(2) 0.24439(18) 0.71478(15) 0.0327(8) Uani 1 1 d . . . 
H224 H 0.4239 0.2800 0.6876 0.039 Uiso 1 1 calc R . . 
C225 C 0.4077(2) 0.24869(17) 0.77746(16) 0.0327(8) Uani 1 1 d . . . 
H225 H 0.4511 0.2867 0.7935 0.039 Uiso 1 1 calc R . . 
C226 C 0.3603(2) 0.19761(17) 0.81761(15) 0.0279(7) Uani 1 1 d . . . 
H226 H 0.3712 0.2007 0.8609 0.033 Uiso 1 1 calc R . . 
C231 C 0.12648(19) 0.04423(14) 0.80730(12) 0.0156(6) Uani 1 1 d . . . 
C232 C 0.1345(2) -0.02129(16) 0.76731(13) 0.0235(7) Uani 1 1 d . . . 
H232 H 0.1932 -0.0476 0.7625 0.028 Uiso 1 1 calc R . . 
C233 C 0.0570(2) -0.04741(17) 0.73503(14) 0.0240(7) Uani 1 1 d . . . 
H233 H 0.0624 -0.0920 0.7080 0.029 Uiso 1 1 calc R . . 
C234 C -0.0281(2) -0.00964(17) 0.74157(13) 0.0253(7) Uani 1 1 d . . . 
H234 H -0.0810 -0.0278 0.7187 0.030 Uiso 1 1 calc R . . 
C235 C -0.0373(2) 0.05497(16) 0.78139(14) 0.0256(7) Uani 1 1 d . . . 
H235 H -0.0965 0.0804 0.7864 0.031 Uiso 1 1 calc R . . 
C236 C 0.0404(2) 0.08233(15) 0.81389(13) 0.0193(6) Uani 1 1 d . . . 
H236 H 0.0347 0.1272 0.8407 0.023 Uiso 1 1 calc R . . 
C240 C 0.19691(19) 0.13969(15) 0.91263(12) 0.0190(6) Uani 1 1 d . . . 
H24A H 0.2541 0.1640 0.9309 0.023 Uiso 1 1 calc R . . 
H24B H 0.1549 0.1837 0.8993 0.023 Uiso 1 1 calc R . . 
C241 C 0.1470(2) 0.08947(17) 0.96182(14) 0.0264(7) Uani 1 1 d . . . 
H24C H 0.1011 0.0541 0.9418 0.040 Uiso 1 1 calc R . . 
H24D H 0.1145 0.1249 0.9909 0.040 Uiso 1 1 calc R . . 
H24E H 0.1933 0.0572 0.9842 0.040 Uiso 1 1 calc R . . 
  
loop_ 
 _atom_site_aniso_label 
 _atom_site_aniso_U_11 
 _atom_site_aniso_U_22 
 _atom_site_aniso_U_33 
 _atom_site_aniso_U_23 
 _atom_site_aniso_U_13 
 _atom_site_aniso_U_12 
Co1 0.01330(18) 0.01155(16) 0.01624(18) 0.00066(15) 0.00040(15) 0.00150(16) 
Co2 0.01324(18) 0.01127(16) 0.01633(18) -0.00110(16) 0.00068(15) 0.00002(15) 
N11 0.0192(13) 0.0243(14) 0.0191(13) -0.0004(10) 0.0005(10) -0.0008(10) 
C11 0.0090(14) 0.0241(16) 0.0242(17) -0.0003(12) 0.0044(12) -0.0040(11) 
N12 0.0226(13) 0.0311(15) 0.0219(13) 0.0015(11) 0.0017(11) -0.0029(11) 
C12 0.0168(16) 0.0231(17) 0.0213(15) -0.0037(11) -0.0042(13) -0.0046(11) 
N13 0.0190(14) 0.090(2) 0.0180(14) -0.0039(15) 0.0018(11) -0.0162(15) 
N21 0.0163(13) 0.0204(13) 0.0226(14) 0.0017(10) 0.0006(10) -0.0004(9) 
C21 0.0126(14) 0.0120(14) 0.0195(15) -0.0006(11) -0.0050(13) 0.0008(10) 
N22 0.0192(13) 0.0213(14) 0.0212(14) -0.0017(10) -0.0015(11) -0.0010(10) 
C22 0.0126(15) 0.0148(14) 0.0232(17) 0.0017(11) 0.0017(12) -0.0047(10) 
N23 0.0163(13) 0.0418(15) 0.0175(13) 0.0005(10) -0.0009(11) -0.0045(11) 
N31 0.0204(14) 0.0357(16) 0.0213(14) -0.0019(11) 0.0010(11) 0.0063(11) 
C31 0.0183(15) 0.0204(15) 0.0144(14) -0.0036(12) 0.0052(12) -0.0011(12) 
N32 0.0178(13) 0.0175(13) 0.0238(13) 0.0004(9) -0.0039(10) -0.0011(10) 
C32 0.0238(17) 0.0234(16) 0.0172(15) 0.0005(11) -0.0062(12) -0.0034(12) 
N33 0.0179(14) 0.085(2) 0.0246(15) -0.0065(16) -0.0028(11) 0.0097(15) 
N41 0.0202(14) 0.0171(13) 0.0346(16) 0.0019(10) 0.0018(11) 0.0003(10) 
C41 0.0172(16) 0.0232(17) 0.0245(17) -0.0015(12) -0.0043(12) -0.0024(12) 
N42 0.0293(15) 0.0144(13) 0.0363(16) 0.0018(11) -0.0021(13) 0.0003(11) 
C42 0.0231(17) 0.0162(15) 0.0317(18) 0.0010(12) -0.0061(14) 0.0089(13) 
N43 0.0246(15) 0.0111(13) 0.088(2) 0.0027(14) -0.0114(16) -0.0005(11) 
N51 0.0193(14) 0.0255(14) 0.0229(14) -0.0050(10) 0.0023(11) 0.0002(10) 
C51 0.0241(19) 0.0249(16) 0.0245(17) -0.0067(12) 0.0047(14) -0.0013(12) 
N52 0.0137(12) 0.0253(14) 0.0217(13) -0.0027(9) -0.0004(11) -0.0009(10) 
C52 0.0175(15) 0.0242(15) 0.0202(15) -0.0028(13) -0.0051(12) -0.0058(13) 
N53 0.0182(16) 0.072(2) 0.064(2) -0.0439(17) 0.0145(15) -0.0098(14) 
N61 0.0269(15) 0.0155(12) 0.0307(15) -0.0021(10) -0.0017(12) -0.0028(10) 
C61 0.0166(15) 0.0163(15) 0.0218(16) -0.0079(12) -0.0035(12) 0.0009(12) 
N62 0.0226(14) 0.0169(13) 0.0281(15) -0.0019(10) 0.0049(11) -0.0050(10) 
C62 0.0157(15) 0.0206(16) 0.0175(15) 0.0025(12) -0.0006(12) 0.0003(12) 
N63 0.0315(15) 0.0118(12) 0.0217(13) 0.0001(10) -0.0008(11) -0.0029(10) 
P1 0.0149(4) 0.0164(3) 0.0184(4) 0.0005(3) 0.0028(3) 0.0005(3) 
C111 0.0142(15) 0.0138(14) 0.0237(16) -0.0036(11) 0.0022(13) 0.0002(11) 
C112 0.0173(16) 0.0189(14) 0.0193(15) -0.0039(11) 0.0005(12) -0.0022(11) 
C113 0.0207(17) 0.0213(15) 0.0239(17) -0.0015(12) -0.0055(13) 0.0027(12) 
C114 0.0143(17) 0.0276(17) 0.037(2) -0.0092(14) -0.0033(14) 0.0057(12) 
C115 0.0246(19) 0.0330(17) 0.0254(17) -0.0070(13) 0.0072(14) 0.0039(14) 
C116 0.0238(17) 0.0271(16) 0.0184(15) 0.0003(12) 0.0004(13) 0.0032(13) 
C121 0.0158(15) 0.0183(14) 0.0153(15) 0.0021(11) 0.0046(12) 0.0042(11) 
C122 0.0184(16) 0.0214(15) 0.0242(16) 0.0007(12) -0.0019(13) -0.0032(12) 
C123 0.0194(17) 0.0266(16) 0.0273(17) 0.0079(13) 0.0021(13) -0.0071(12) 
C124 0.0259(17) 0.0313(17) 0.0206(16) 0.0028(13) 0.0067(14) 0.0067(13) 
C125 0.049(2) 0.0236(17) 0.0220(17) -0.0089(13) 0.0069(16) -0.0012(15) 
C126 0.036(2) 0.0176(16) 0.0298(19) -0.0049(13) 0.0062(15) -0.0048(13) 
C131 0.0125(15) 0.0255(16) 0.0155(15) 0.0006(11) 0.0017(12) -0.0006(12) 
C132 0.0234(17) 0.0246(15) 0.0253(17) 0.0017(13) 0.0041(14) -0.0021(13) 
C133 0.040(2) 0.0370(18) 0.0263(19) -0.0050(14) 0.0015(16) -0.0137(16) 
C134 0.027(2) 0.064(2) 0.0221(18) -0.0019(16) -0.0032(15) -0.0151(17) 
C135 0.0257(19) 0.059(2) 0.036(2) 0.0034(17) -0.0078(16) 0.0056(16) 
C136 0.0268(19) 0.0351(18) 0.0310(19) -0.0047(14) -0.0006(15) 0.0085(14) 
C140 0.0232(17) 0.0169(15) 0.0341(19) 0.0010(12) 0.0068(14) 0.0029(12) 
C141 0.050(2) 0.0275(17) 0.035(2) 0.0119(15) 0.0084(17) -0.0021(15) 
P2 0.0150(4) 0.0152(3) 0.0174(4) -0.0011(3) -0.0032(3) 0.0007(3) 
C211 0.0235(17) 0.0165(14) 0.0165(15) -0.0038(11) -0.0033(12) 0.0038(12) 
C212 0.0232(18) 0.0278(16) 0.0264(18) -0.0028(13) -0.0019(13) 0.0051(13) 
C213 0.0287(19) 0.044(2) 0.035(2) -0.0064(15) -0.0139(15) 0.0143(15) 
C214 0.051(2) 0.0293(18) 0.030(2) -0.0023(14) -0.0148(17) 0.0230(16) 
C215 0.044(2) 0.0219(16) 0.0311(18) 0.0053(14) -0.0009(16) 0.0073(14) 
C216 0.0234(17) 0.0240(15) 0.0260(17) 0.0000(13) -0.0012(14) 0.0047(12) 
C221 0.0180(16) 0.0181(14) 0.0207(16) 0.0025(11) -0.0028(12) 0.0014(12) 
C222 0.0267(18) 0.0335(17) 0.0238(17) 0.0019(13) -0.0026(14) -0.0060(14) 
C223 0.035(2) 0.047(2) 0.0243(19) 0.0083(15) -0.0002(16) 0.0008(16) 
C224 0.0290(19) 0.0265(19) 0.043(2) 0.0118(14) 0.0105(15) 0.0027(13) 
C225 0.0285(18) 0.0249(19) 0.045(2) 0.0030(14) 0.0051(15) -0.0081(13) 
C226 0.0283(18) 0.0263(16) 0.0290(18) 0.0012(13) -0.0032(15) -0.0065(14) 
C231 0.0148(14) 0.0168(13) 0.0153(14) 0.0016(11) -0.0055(12) -0.0028(12) 
C232 0.0201(16) 0.0223(15) 0.0280(17) -0.0041(12) 0.0002(14) -0.0008(13) 
C233 0.0253(18) 0.0217(16) 0.0250(17) -0.0080(13) -0.0014(14) -0.0051(13) 
C234 0.0198(17) 0.0285(17) 0.0275(17) -0.0003(13) -0.0089(14) -0.0074(13) 
C235 0.0186(16) 0.0217(16) 0.0365(18) 0.0032(13) -0.0050(14) 0.0023(13) 
C236 0.0203(16) 0.0138(14) 0.0239(16) -0.0006(11) -0.0046(13) -0.0004(12) 
C240 0.0216(16) 0.0188(14) 0.0164(16) -0.0084(11) -0.0040(12) 0.0041(11) 
C241 0.0301(19) 0.0272(16) 0.0220(17) -0.0088(13) 0.0030(14) 0.0005(14) 
  
_geom_special_details 
; 
 All esds (except the esd in the dihedral angle between two l.s. planes) 
 are estimated using the full covariance matrix.  The cell esds are taken 
 into account individually in the estimation of esds in distances, angles 
 and torsion angles; correlations between esds in cell parameters are only 
 used when they are defined by crystal symmetry.  An approximate (isotropic) 
 treatment of cell esds is used for estimating esds involving l.s. planes. 
; 
  
loop_ 
 _geom_bond_atom_site_label_1 
 _geom_bond_atom_site_label_2 
 _geom_bond_distance 
 _geom_bond_site_symmetry_2 
 _geom_bond_publ_flag 
Co1 N41 2.086(2) . ? 
Co1 N62 2.099(2) 4_546 ? 
Co1 N11 2.103(2) . ? 
Co1 N31 2.135(3) . ? 
Co1 N32 2.145(2) 3_457 ? 
Co1 N21 2.168(2) . ? 
Co2 N12 2.101(2) . ? 
Co2 N52 2.111(2) 3_456 ? 
Co2 N42 2.116(2) 4_546 ? 
Co2 N61 2.125(2) . ? 
Co2 N51 2.132(2) . ? 
Co2 N22 2.137(2) . ? 
N11 C11 1.145(3) . ? 
C11 N13 1.313(4) . ? 
N12 C12 1.142(3) . ? 
C12 N13 1.310(4) . ? 
N21 C21 1.157(3) . ? 
C21 N23 1.309(4) . ? 
N22 C22 1.149(3) . ? 
C22 N23 1.317(4) . ? 
N31 C31 1.146(3) . ? 
C31 N33 1.301(4) . ? 
N32 C32 1.148(3) . ? 
N32 Co1 2.145(2) 3_557 ? 
C32 N33 1.314(4) . ? 
N41 C41 1.153(3) . ? 
C41 N43 1.302(4) . ? 
N42 C42 1.151(3) . ? 
N42 Co2 2.116(2) 4_556 ? 
C42 N43 1.308(4) . ? 
N51 C51 1.148(4) . ? 
C51 N53 1.316(4) . ? 
N52 C52 1.151(3) . ? 
N52 Co2 2.111(2) 3_556 ? 
C52 N53 1.299(4) . ? 
N61 C61 1.159(3) . ? 
C61 N63 1.305(4) . ? 
N62 C62 1.153(3) . ? 
N62 Co1 2.099(2) 4_556 ? 
C62 N63 1.312(4) . ? 
P1 C121 1.787(3) . ? 
P1 C131 1.788(3) . ? 
P1 C140 1.793(3) . ? 
P1 C111 1.799(3) . ? 
C111 C112 1.388(4) . ? 
C111 C116 1.394(4) . ? 
C112 C113 1.389(4) . ? 
C113 C114 1.377(4) . ? 
C114 C115 1.383(4) . ? 
C115 C116 1.386(4) . ? 
C121 C122 1.394(4) . ? 
C121 C126 1.395(4) . ? 
C122 C123 1.378(4) . ? 
C123 C124 1.383(4) . ? 
C124 C125 1.373(4) . ? 
C125 C126 1.378(4) . ? 
C131 C132 1.391(4) . ? 
C131 C136 1.396(4) . ? 
C132 C133 1.386(4) . ? 
C133 C134 1.375(5) . ? 
C134 C135 1.386(5) . ? 
C135 C136 1.379(4) . ? 
C140 C141 1.536(4) . ? 
P2 C231 1.797(3) . ? 
P2 C221 1.799(3) . ? 
P2 C240 1.800(3) . ? 
P2 C211 1.800(3) . ? 
C211 C212 1.387(4) . ? 
C211 C216 1.399(4) . ? 
C212 C213 1.386(4) . ? 
C213 C214 1.380(5) . ? 
C214 C215 1.381(5) . ? 
C215 C216 1.381(4) . ? 
C221 C222 1.380(4) . ? 
C221 C226 1.393(4) . ? 
C222 C223 1.389(4) . ? 
C223 C224 1.383(4) . ? 
C224 C225 1.374(4) . ? 
C225 C226 1.391(4) . ? 
C231 C236 1.387(4) . ? 
C231 C232 1.399(4) . ? 
C232 C233 1.376(4) . ? 
C233 C234 1.372(4) . ? 
C234 C235 1.386(4) . ? 
C235 C236 1.387(4) . ? 
C240 C241 1.529(4) . ? 
  
loop_ 
 _geom_angle_atom_site_label_1 
 _geom_angle_atom_site_label_2 
 _geom_angle_atom_site_label_3 
 _geom_angle 
 _geom_angle_site_symmetry_1 
 _geom_angle_site_symmetry_3 
 _geom_angle_publ_flag 
N41 Co1 N62 175.94(10) . 4_546 ? 
N41 Co1 N11 92.91(9) . . ? 
N62 Co1 N11 91.09(9) 4_546 . ? 
N41 Co1 N31 89.71(9) . . ? 
N62 Co1 N31 86.33(9) 4_546 . ? 
N11 Co1 N31 175.89(9) . . ? 
N41 Co1 N32 89.11(8) . 3_457 ? 
N62 Co1 N32 90.55(8) 4_546 3_457 ? 
N11 Co1 N32 85.31(9) . 3_457 ? 
N31 Co1 N32 97.90(9) . 3_457 ? 
N41 Co1 N21 88.63(9) . . ? 
N62 Co1 N21 92.38(9) 4_546 . ? 
N11 Co1 N21 84.98(9) . . ? 
N31 Co1 N21 91.92(9) . . ? 
N32 Co1 N21 169.91(9) 3_457 . ? 
N12 Co2 N52 86.10(9) . 3_456 ? 
N12 Co2 N42 94.83(9) . 4_546 ? 
N52 Co2 N42 90.26(9) 3_456 4_546 ? 
N12 Co2 N61 93.27(9) . . ? 
N52 Co2 N61 88.58(9) 3_456 . ? 
N42 Co2 N61 171.72(10) 4_546 . ? 
N12 Co2 N51 177.02(9) . . ? 
N52 Co2 N51 96.73(9) 3_456 . ? 
N42 Co2 N51 86.12(9) 4_546 . ? 
N61 Co2 N51 85.88(9) . . ? 
N12 Co2 N22 85.45(9) . . ? 
N52 Co2 N22 171.43(9) 3_456 . ? 
N42 Co2 N22 89.04(9) 4_546 . ? 
N61 Co2 N22 93.32(9) . . ? 
N51 Co2 N22 91.75(9) . . ? 
C11 N11 Co1 168.4(2) . . ? 
N11 C11 N13 174.8(3) . . ? 
C12 N12 Co2 159.4(2) . . ? 
N12 C12 N13 175.4(3) . . ? 
C12 N13 C11 117.0(2) . . ? 
C21 N21 Co1 152.8(2) . . ? 
N21 C21 N23 172.8(3) . . ? 
C22 N22 Co2 164.7(2) . . ? 
N22 C22 N23 172.9(3) . . ? 
C21 N23 C22 119.1(2) . . ? 
C31 N31 Co1 140.4(2) . . ? 
N31 C31 N33 172.8(3) . . ? 
C32 N32 Co1 152.9(2) . 3_557 ? 
N32 C32 N33 173.5(3) . . ? 
C31 N33 C32 121.4(2) . . ? 
C41 N41 Co1 176.8(2) . . ? 
N41 C41 N43 171.8(3) . . ? 
C42 N42 Co2 155.1(2) . 4_556 ? 
N42 C42 N43 173.0(3) . . ? 
C41 N43 C42 122.6(3) . . ? 
C51 N51 Co2 161.0(2) . . ? 
N51 C51 N53 172.0(3) . . ? 
C52 N52 Co2 155.6(2) . 3_556 ? 
N52 C52 N53 171.1(3) . . ? 
C52 N53 C51 122.3(3) . . ? 
C61 N61 Co2 146.9(2) . . ? 
N61 C61 N63 172.7(3) . . ? 
C62 N62 Co1 173.4(2) . 4_556 ? 
N62 C62 N63 174.4(3) . . ? 
C61 N63 C62 121.5(2) . . ? 
C121 P1 C131 109.25(13) . . ? 
C121 P1 C140 110.34(13) . . ? 
C131 P1 C140 110.17(14) . . ? 
C121 P1 C111 106.53(12) . . ? 
C131 P1 C111 111.33(12) . . ? 
C140 P1 C111 109.16(13) . . ? 
C112 C111 C116 120.4(2) . . ? 
C112 C111 P1 119.6(2) . . ? 
C116 C111 P1 119.9(2) . . ? 
C111 C112 C113 120.0(3) . . ? 
C114 C113 C112 119.8(3) . . ? 
C113 C114 C115 120.1(3) . . ? 
C114 C115 C116 121.0(3) . . ? 
C115 C116 C111 118.7(3) . . ? 
C122 C121 C126 119.2(3) . . ? 
C122 C121 P1 118.3(2) . . ? 
C126 C121 P1 122.0(2) . . ? 
C123 C122 C121 120.2(3) . . ? 
C122 C123 C124 120.2(3) . . ? 
C125 C124 C123 119.9(3) . . ? 
C124 C125 C126 120.7(3) . . ? 
C125 C126 C121 119.9(3) . . ? 
C132 C131 C136 119.6(3) . . ? 
C132 C131 P1 121.8(2) . . ? 
C136 C131 P1 118.5(2) . . ? 
C133 C132 C131 119.8(3) . . ? 
C134 C133 C132 120.0(3) . . ? 
C133 C134 C135 120.8(3) . . ? 
C136 C135 C134 119.5(3) . . ? 
C135 C136 C131 120.3(3) . . ? 
C141 C140 P1 114.7(2) . . ? 
C231 P2 C221 109.42(12) . . ? 
C231 P2 C240 110.44(13) . . ? 
C221 P2 C240 108.97(13) . . ? 
C231 P2 C211 109.24(12) . . ? 
C221 P2 C211 112.56(13) . . ? 
C240 P2 C211 106.17(13) . . ? 
C212 C211 C216 120.1(3) . . ? 
C212 C211 P2 120.4(2) . . ? 
C216 C211 P2 119.0(2) . . ? 
C213 C212 C211 119.6(3) . . ? 
C214 C213 C212 119.9(3) . . ? 
C213 C214 C215 121.0(3) . . ? 
C216 C215 C214 119.5(3) . . ? 
C215 C216 C211 119.9(3) . . ? 
C222 C221 C226 119.8(3) . . ? 
C222 C221 P2 120.4(2) . . ? 
C226 C221 P2 119.7(2) . . ? 
C221 C222 C223 119.9(3) . . ? 
C224 C223 C222 120.4(3) . . ? 
C225 C224 C223 119.9(3) . . ? 
C224 C225 C226 120.3(3) . . ? 
C225 C226 C221 119.8(3) . . ? 
C236 C231 C232 119.6(3) . . ? 
C236 C231 P2 121.1(2) . . ? 
C232 C231 P2 119.2(2) . . ? 
C233 C232 C231 119.7(3) . . ? 
C234 C233 C232 120.6(3) . . ? 
C233 C234 C235 120.3(3) . . ? 
C234 C235 C236 119.7(3) . . ? 
C235 C236 C231 120.0(3) . . ? 
C241 C240 P2 111.87(18) . . ? 
  
_diffrn_measured_fraction_theta_max    0.994 
_diffrn_reflns_theta_full              27.50 
_diffrn_measured_fraction_theta_full   0.999 
_refine_diff_density_max    0.693 
_refine_diff_density_min   -0.677 
_refine_diff_density_rms    0.095 

_publ_contact_author
;
    Dr. S.R. Batten
    School of Chemistry
    Monash University 3800
    AUSTRALIA
;

_publ_contact_author_phone            ' +61 3 9905 4606 '
_publ_contact_author_fax              ' +61 3 9905 4597 '
_publ_contact_author_email            ' 
stuart.batten@sci.monash.edu.au '

loop_
_publ_author_name
_publ_author_address
'van der Werff, Patricia M.' 
; 
School of Chemistry
Monash University 3800
AUSTRALIA
;
'Batten, Stuart R.' 
; 
School of Chemistry
Monash University 3800
Australia
;
'Jensen, Paul' 
; 
Department of Chemistry
Trinity College
Dublin 2
Ireland
;
'Moubaraki, Boujemaa' 
; 
School of Chemistry
Monash University 3800
Australia
;
'Murray, Keith S.' 
; 
School of Chemistry
Monash University 3800
Australia
;
'Cashion, John D.' 
; 
School of Physics and Materials Engineering
Monash University 3800
Australia
;

_publ_section_title
;
 Structure and magnetism of 3D anionic metal dicyanamide
 (MePh3P)[M(dca)3] (M = Fe, Co, Ni) and (EtPh3P)[M(dca)3]
 (M = Mn, Co, Ni) networks
;


#=END

 
data_EtNi
  
_audit_creation_method            SHELXL-97 
_chemical_name_systematic 
; 
 Ethyltriphenylphosphonium tris(dicyanamido)nickelate(II)
; 
_chemical_name_common             ? 
_chemical_melting_point           ? 
_chemical_formula_moiety          ? 
_chemical_formula_sum 
 'C26 H20 N9 Ni P' 
_chemical_formula_weight          548.19 
  
loop_ 
 _atom_type_symbol 
 _atom_type_description 
 _atom_type_scat_dispersion_real 
 _atom_type_scat_dispersion_imag 
 _atom_type_scat_source 
 'C'  'C'   0.0033   0.0016 
 'International Tables Vol C Tables 4.2.6.8 and 6.1.1.4' 
 'H'  'H'   0.0000   0.0000 
 'International Tables Vol C Tables 4.2.6.8 and 6.1.1.4' 
 'N'  'N'   0.0061   0.0033 
 'International Tables Vol C Tables 4.2.6.8 and 6.1.1.4' 
 'P'  'P'   0.1023   0.0942 
 'International Tables Vol C Tables 4.2.6.8 and 6.1.1.4' 
 'Ni'  'Ni'   0.3393   1.1124 
 'International Tables Vol C Tables 4.2.6.8 and 6.1.1.4' 
  
_symmetry_cell_setting            Orthorhombic 
_symmetry_space_group_name_H-M    P2(1)2(1)2(1) 
  
loop_ 
 _symmetry_equiv_pos_as_xyz 
 'x, y, z' 
 '-x+1/2, -y, z+1/2' 
 'x+1/2, -y+1/2, -z' 
 '-x, y+1/2, -z+1/2' 
  
_cell_length_a                    14.1192(1) 
_cell_length_b                    16.6545(1) 
_cell_length_c                    21.5833(2) 
_cell_angle_alpha                 90.00 
_cell_angle_beta                  90.00 
_cell_angle_gamma                 90.00 
_cell_volume                      5075.27(7) 
_cell_formula_units_Z             8 
_cell_measurement_temperature     123(2) 
_cell_measurement_reflns_used     ? 
_cell_measurement_theta_min       ? 
_cell_measurement_theta_max       ? 
  
_exptl_crystal_description        prism 
_exptl_crystal_colour             green 
_exptl_crystal_size_max           0.18 
_exptl_crystal_size_mid           0.10 
_exptl_crystal_size_min           0.05 
_exptl_crystal_density_meas       ? 
_exptl_crystal_density_diffrn     1.435 
_exptl_crystal_density_method     'not measured' 
_exptl_crystal_F_000              2256 
_exptl_absorpt_coefficient_mu     0.862 
_exptl_absorpt_correction_type    integration 
_exptl_absorpt_correction_T_min   0.9128 
_exptl_absorpt_correction_T_max   0.9586 
_exptl_absorpt_process_details    ? 
  
_exptl_special_details 
; 
 ? 
; 
  
_diffrn_ambient_temperature       123(2) 
_diffrn_radiation_wavelength      0.71073 
_diffrn_radiation_type            MoK\a 
_diffrn_radiation_source          'fine-focus sealed tube' 
_diffrn_radiation_monochromator   graphite 
_diffrn_measurement_device_type   'Bruker P4' 
_diffrn_measurement_method        '\w scans' 
_diffrn_detector_area_resol_mean  ? 
_diffrn_standards_number          ? 
_diffrn_standards_interval_count  ? 
_diffrn_standards_interval_time   ? 
_diffrn_standards_decay_%         ? 
_diffrn_reflns_number             36451 
_diffrn_reflns_av_R_equivalents   0.0567 
_diffrn_reflns_av_sigmaI/netI     0.0819 
_diffrn_reflns_limit_h_min        -18 
_diffrn_reflns_limit_h_max        18 
_diffrn_reflns_limit_k_min        -16 
_diffrn_reflns_limit_k_max        21 
_diffrn_reflns_limit_l_min        -28 
_diffrn_reflns_limit_l_max        17 
_diffrn_reflns_theta_min          2.62 
_diffrn_reflns_theta_max          28.29 
_reflns_number_total              11953 
_reflns_number_gt                 9695 
_reflns_threshold_expression      >2sigma(I) 
  
_computing_data_collection        'Bruker XSCANS' 
_computing_cell_refinement        'Bruker XSCANS' 
_computing_data_reduction         'Bruker SHELXTL' 
_computing_structure_solution     'SHELXS-97 (Sheldrick, 1990)' 
_computing_structure_refinement   'SHELXL-97 (Sheldrick, 1997)' 
_computing_molecular_graphics     'Bruker SHELXTL' 
_computing_publication_material   'Bruker SHELXTL' 
  
_refine_special_details 
; 
 Refinement of F^2^ against ALL reflections.  The weighted R-factor wR and 
 goodness of fit S are based on F^2^, conventional R-factors R are based 
 on F, with F set to zero for negative F^2^. The threshold expression of 
 F^2^ > 2sigma(F^2^) is used only for calculating R-factors(gt) etc. and is 
 not relevant to the choice of reflections for refinement.  R-factors based 
 on F^2^ are statistically about twice as large as those based on F, and R- 
 factors based on ALL data will be even larger. 
; 
  
_refine_ls_structure_factor_coef  Fsqd 
_refine_ls_matrix_type            full 
_refine_ls_weighting_scheme       calc 
_refine_ls_weighting_details 
 'calc w=1/[\s^2^(Fo^2^)+(0.0166P)^2^+1.6608P] where P=(Fo^2^+2Fc^2^)/3' 
_atom_sites_solution_primary      direct 
_atom_sites_solution_secondary    difmap 
_atom_sites_solution_hydrogens    geom 
_refine_ls_hydrogen_treatment     mixed 
_refine_ls_extinction_method      none 
_refine_ls_extinction_coef        ? 
_refine_ls_abs_structure_details 
 'Flack H D (1983), Acta Cryst. A39, 876-881' 
_refine_ls_abs_structure_Flack    0.003(8) 
_refine_ls_number_reflns          11953 
_refine_ls_number_parameters      669 
_refine_ls_number_restraints      0 
_refine_ls_R_factor_all           0.0672 
_refine_ls_R_factor_gt            0.0446 
_refine_ls_wR_factor_ref          0.0685 
_refine_ls_wR_factor_gt           0.0636 
_refine_ls_goodness_of_fit_ref    1.021 
_refine_ls_restrained_S_all       1.021 
_refine_ls_shift/su_max           0.001 
_refine_ls_shift/su_mean          0.000 
  
loop_ 
 _atom_site_label 
 _atom_site_type_symbol 
 _atom_site_fract_x 
 _atom_site_fract_y 
 _atom_site_fract_z 
 _atom_site_U_iso_or_equiv 
 _atom_site_adp_type 
 _atom_site_occupancy 
 _atom_site_symmetry_multiplicity 
 _atom_site_calc_flag 
 _atom_site_refinement_flags 
 _atom_site_disorder_assembly 
 _atom_site_disorder_group 
Ni1 Ni -0.12588(2) 0.268984(19) 0.923332(15) 0.01080(8) Uani 1 1 d . . . 
Ni2 Ni 0.03689(2) 0.270026(19) 0.598682(15) 0.01088(8) Uani 1 1 d . . . 
N11 N -0.17172(16) 0.24661(12) 0.83444(11) 0.0172(5) Uani 1 1 d . . . 
C11 C -0.18708(19) 0.24443(15) 0.78232(14) 0.0160(6) Uani 1 1 d . . . 
N12 N -0.09124(17) 0.26021(14) 0.64386(11) 0.0198(5) Uani 1 1 d . . . 
C12 C -0.1452(2) 0.25198(15) 0.68262(13) 0.0176(6) Uani 1 1 d . . . 
N13 N -0.21241(18) 0.24196(18) 0.72372(11) 0.0379(7) Uani 1 1 d . . . 
N21 N 0.00951(16) 0.28265(13) 0.88231(11) 0.0172(5) Uani 1 1 d . . . 
C21 C 0.06061(19) 0.29096(14) 0.84102(14) 0.0134(6) Uani 1 1 d . . . 
N22 N 0.09470(16) 0.28591(13) 0.68718(12) 0.0177(5) Uani 1 1 d . . . 
C22 C 0.10436(19) 0.29129(14) 0.73988(14) 0.0136(6) Uani 1 1 d . . . 
N23 N 0.12621(18) 0.30044(14) 0.79905(11) 0.0221(6) Uani 1 1 d . . . 
N31 N -0.07035(17) 0.28747(13) 1.01218(11) 0.0202(6) Uani 1 1 d . . . 
C31 C -0.0039(2) 0.27688(16) 1.04147(12) 0.0145(6) Uani 1 1 d . . . 
N32 N 0.23122(16) 0.24300(12) 1.05110(10) 0.0158(5) Uani 1 1 d . . . 
C32 C 0.1526(2) 0.25339(14) 1.06152(12) 0.0177(6) Uani 1 1 d . . . 
N33 N 0.06498(17) 0.26501(18) 1.08064(12) 0.0346(6) Uani 1 1 d . . . 
N41 N -0.14614(16) 0.39063(13) 0.91399(11) 0.0180(5) Uani 1 1 d . . . 
C41 C -0.15452(19) 0.45899(16) 0.90747(13) 0.0188(7) Uani 1 1 d . . . 
N42 N -0.06731(17) 0.64787(13) 0.89451(12) 0.0215(6) Uani 1 1 d . . . 
C42 C -0.1140(2) 0.59187(15) 0.89712(14) 0.0194(6) Uani 1 1 d . . . 
N43 N -0.17723(18) 0.53420(13) 0.89886(15) 0.0365(7) Uani 1 1 d . . . 
N51 N 0.16972(17) 0.28185(13) 0.55690(10) 0.0178(5) Uani 1 1 d . . . 
C51 C 0.2500(2) 0.29044(15) 0.55047(13) 0.0195(7) Uani 1 1 d . . . 
N52 N 0.46217(17) 0.24945(12) 0.48260(10) 0.0169(5) Uani 1 1 d . . . 
C52 C 0.4005(2) 0.27342(18) 0.51205(13) 0.0186(6) Uani 1 1 d . . . 
N53 N 0.3407(2) 0.30698(18) 0.55055(15) 0.0473(9) Uani 1 1 d . . . 
N61 N 0.02160(16) 0.39321(12) 0.58415(11) 0.0190(5) Uani 1 1 d . . . 
C61 C 0.0476(2) 0.45099(15) 0.55872(13) 0.0158(6) Uani 1 1 d . . . 
N62 N 0.10464(16) 0.64770(13) 0.56110(11) 0.0185(6) Uani 1 1 d . . . 
C62 C 0.09026(19) 0.58249(16) 0.54648(13) 0.0143(6) Uani 1 1 d . . . 
N63 N 0.07468(17) 0.51057(12) 0.52393(11) 0.0182(5) Uani 1 1 d . . . 
P1 P 0.12866(5) 0.46554(4) 0.31308(3) 0.01427(15) Uani 1 1 d . . . 
C111 C 0.02092(19) 0.52338(14) 0.31523(13) 0.0151(6) Uani 1 1 d . . . 
C112 C -0.0166(2) 0.55307(15) 0.26021(13) 0.0165(6) Uani 1 1 d . . . 
H112 H 0.0163 0.5454 0.2223 0.020 Uiso 1 1 calc R . . 
C113 C -0.1024(2) 0.59390(16) 0.26095(14) 0.0204(7) Uani 1 1 d . . . 
H113 H -0.1278 0.6152 0.2236 0.025 Uiso 1 1 calc R . . 
C114 C -0.1506(2) 0.60342(16) 0.31609(15) 0.0222(7) Uani 1 1 d . . . 
H114 H -0.2096 0.6308 0.3166 0.027 Uiso 1 1 calc R . . 
C115 C -0.1135(2) 0.57343(17) 0.37048(14) 0.0243(7) Uani 1 1 d . . . 
H115 H -0.1477 0.5799 0.4080 0.029 Uiso 1 1 calc R . . 
C116 C -0.0272(2) 0.53397(16) 0.37119(13) 0.0204(6) Uani 1 1 d . . . 
H116 H -0.0013 0.5145 0.4089 0.024 Uiso 1 1 calc R . . 
C121 C 0.17596(19) 0.47699(15) 0.23672(13) 0.0143(6) Uani 1 1 d . . . 
C122 C 0.2223(2) 0.54865(15) 0.22238(13) 0.0170(6) Uani 1 1 d . . . 
H122 H 0.2358 0.5863 0.2542 0.020 Uiso 1 1 calc R . . 
C123 C 0.2484(2) 0.56501(16) 0.16217(14) 0.0212(7) Uani 1 1 d . . . 
H123 H 0.2809 0.6134 0.1528 0.025 Uiso 1 1 calc R . . 
C124 C 0.2274(2) 0.51124(16) 0.11549(14) 0.0215(7) Uani 1 1 d . . . 
H124 H 0.2437 0.5233 0.0738 0.026 Uiso 1 1 calc R . . 
C125 C 0.1826(2) 0.44005(17) 0.12962(14) 0.0276(8) Uani 1 1 d . . . 
H125 H 0.1695 0.4027 0.0975 0.033 Uiso 1 1 calc R . . 
C126 C 0.1568(2) 0.42226(17) 0.18945(14) 0.0238(7) Uani 1 1 d . . . 
H126 H 0.1259 0.3729 0.1986 0.029 Uiso 1 1 calc R . . 
C131 C 0.21252(19) 0.50182(16) 0.36873(13) 0.0168(6) Uani 1 1 d . . . 
C132 C 0.2051(2) 0.57812(16) 0.39488(14) 0.0228(7) Uani 1 1 d . . . 
H132 H 0.1524 0.6114 0.3854 0.027 Uiso 1 1 calc R . . 
C133 C 0.2748(2) 0.60520(18) 0.43473(14) 0.0308(8) Uani 1 1 d . . . 
H133 H 0.2697 0.6570 0.4528 0.037 Uiso 1 1 calc R . . 
C134 C 0.3516(3) 0.5573(2) 0.44822(15) 0.0353(9) Uani 1 1 d . . . 
H134 H 0.3997 0.5768 0.4751 0.042 Uiso 1 1 calc R . . 
C135 C 0.3593(2) 0.4811(2) 0.42302(15) 0.0352(8) Uani 1 1 d . . . 
H135 H 0.4120 0.4482 0.4331 0.042 Uiso 1 1 calc R . . 
C136 C 0.2903(2) 0.45334(18) 0.38331(14) 0.0269(8) Uani 1 1 d . . . 
H136 H 0.2955 0.4012 0.3658 0.032 Uiso 1 1 calc R . . 
C140 C 0.1017(2) 0.36189(16) 0.32800(14) 0.0223(7) Uani 1 1 d . . . 
H14A H 0.0529 0.3440 0.2981 0.027 Uiso 1 1 calc R . . 
H14B H 0.1594 0.3296 0.3204 0.027 Uiso 1 1 calc R . . 
C141 C 0.0662(2) 0.34447(18) 0.39374(16) 0.0357(9) Uani 1 1 d . . . 
H14C H 0.1135 0.3625 0.4239 0.053 Uiso 1 1 calc R . . 
H14D H 0.0558 0.2866 0.3986 0.053 Uiso 1 1 calc R . . 
H14E H 0.0065 0.3731 0.4008 0.053 Uiso 1 1 calc R . . 
P2 P 0.23062(5) 0.08082(4) 0.84678(3) 0.01363(15) Uani 1 1 d . . . 
C211 C 0.2971(2) -0.00336(15) 0.87640(12) 0.0142(6) Uani 1 1 d . . . 
C212 C 0.3922(2) 0.00426(17) 0.88889(14) 0.0227(7) Uani 1 1 d . . . 
H212 H 0.4254 0.0511 0.8764 0.027 Uiso 1 1 calc R . . 
C213 C 0.4395(2) -0.05704(18) 0.91999(15) 0.0305(8) Uani 1 1 d . . . 
H213 H 0.5055 -0.0527 0.9282 0.037 Uiso 1 1 calc R . . 
C214 C 0.3900(2) -0.12422(18) 0.93885(15) 0.0319(8) Uani 1 1 d . . . 
H214 H 0.4218 -0.1653 0.9613 0.038 Uiso 1 1 calc R . . 
C215 C 0.2954(2) -0.13236(16) 0.92556(15) 0.0286(7) Uani 1 1 d . . . 
H215 H 0.2627 -0.1796 0.9378 0.034 Uiso 1 1 calc R . . 
C216 C 0.2474(2) -0.07232(15) 0.89459(14) 0.0220(7) Uani 1 1 d . . . 
H216 H 0.1818 -0.0777 0.8857 0.026 Uiso 1 1 calc R . . 
C221 C 0.29888(19) 0.14269(15) 0.79514(13) 0.0171(6) Uani 1 1 d . . . 
C222 C 0.2837(2) 0.13859(18) 0.73170(14) 0.0257(7) Uani 1 1 d . . . 
H222 H 0.2407 0.1003 0.7151 0.031 Uiso 1 1 calc R . . 
C223 C 0.3322(2) 0.19130(19) 0.69250(16) 0.0311(8) Uani 1 1 d . . . 
H223 H 0.3215 0.1893 0.6491 0.037 Uiso 1 1 calc R . . 
C224 C 0.3952(2) 0.24595(17) 0.71655(16) 0.0306(8) Uani 1 1 d . . . 
H224 H 0.4274 0.2820 0.6897 0.037 Uiso 1 1 calc R . . 
C225 C 0.4118(2) 0.24864(16) 0.77908(16) 0.0287(8) Uani 1 1 d . . . 
H225 H 0.4563 0.2860 0.7952 0.034 Uiso 1 1 calc R . . 
C226 C 0.3642(2) 0.19746(16) 0.81901(15) 0.0263(7) Uani 1 1 d . . . 
H226 H 0.3760 0.1996 0.8623 0.032 Uiso 1 1 calc R . . 
C231 C 0.1270(2) 0.04461(14) 0.80754(12) 0.0132(6) Uani 1 1 d . . . 
C232 C 0.1348(2) -0.02110(15) 0.76757(13) 0.0206(7) Uani 1 1 d . . . 
H232 H 0.1940 -0.0473 0.7625 0.025 Uiso 1 1 calc R . . 
C233 C 0.0565(2) -0.04792(17) 0.73540(14) 0.0212(7) Uani 1 1 d . . . 
H233 H 0.0617 -0.0930 0.7086 0.025 Uiso 1 1 calc R . . 
C234 C -0.0286(2) -0.00968(16) 0.74206(14) 0.0226(7) Uani 1 1 d . . . 
H234 H -0.0820 -0.0279 0.7192 0.027 Uiso 1 1 calc R . . 
C235 C -0.0380(2) 0.05577(16) 0.78201(14) 0.0230(7) Uani 1 1 d . . . 
H235 H -0.0977 0.0814 0.7869 0.028 Uiso 1 1 calc R . . 
C236 C 0.0400(2) 0.08286(15) 0.81424(13) 0.0156(6) Uani 1 1 d . . . 
H236 H 0.0343 0.1278 0.8411 0.019 Uiso 1 1 calc R . . 
C240 C 0.1978(2) 0.13988(15) 0.91347(12) 0.0167(6) Uani 1 1 d . . . 
H24A H 0.2553 0.1644 0.9317 0.020 Uiso 1 1 calc R . . 
H24B H 0.1550 0.1838 0.9003 0.020 Uiso 1 1 calc R . . 
C241 C 0.1481(2) 0.08853(17) 0.96260(14) 0.0238(7) Uani 1 1 d . . . 
H24C H 0.1040 0.0515 0.9423 0.036 Uiso 1 1 calc R . . 
H24D H 0.1131 0.1235 0.9911 0.036 Uiso 1 1 calc R . . 
H24E H 0.1954 0.0578 0.9858 0.036 Uiso 1 1 calc R . . 
  
loop_ 
 _atom_site_aniso_label 
 _atom_site_aniso_U_11 
 _atom_site_aniso_U_22 
 _atom_site_aniso_U_33 
 _atom_site_aniso_U_23 
 _atom_site_aniso_U_13 
 _atom_site_aniso_U_12 
Ni1 0.01049(17) 0.00958(15) 0.01234(18) 0.00047(14) 0.00033(14) 0.00120(14) 
Ni2 0.01052(17) 0.00968(15) 0.01244(18) -0.00070(15) 0.00056(14) -0.00006(14) 
N11 0.0172(13) 0.0177(14) 0.0167(14) -0.0012(9) 0.0007(11) 0.0004(9) 
C11 0.0085(14) 0.0197(16) 0.0198(17) 0.0003(11) 0.0048(12) -0.0026(10) 
N12 0.0185(13) 0.0249(13) 0.0158(13) -0.0003(10) 0.0003(11) -0.0018(11) 
C12 0.0154(16) 0.0228(17) 0.0147(16) -0.0039(11) -0.0033(13) -0.0033(11) 
N13 0.0180(15) 0.083(2) 0.0127(14) -0.0024(14) 0.0018(11) -0.0185(15) 
N21 0.0148(13) 0.0161(13) 0.0208(14) 0.0013(10) 0.0027(11) 0.0003(9) 
C21 0.0117(15) 0.0115(14) 0.0169(16) 0.0008(11) -0.0079(13) 0.0006(10) 
N22 0.0170(13) 0.0185(13) 0.0175(14) -0.0011(10) -0.0031(11) 0.0000(9) 
C22 0.0086(15) 0.0129(14) 0.0194(17) 0.0009(10) 0.0016(12) -0.0033(10) 
N23 0.0136(13) 0.0379(14) 0.0148(14) 0.0009(10) 0.0011(12) -0.0050(11) 
N31 0.0154(14) 0.0280(15) 0.0172(14) -0.0018(10) 0.0011(11) 0.0050(10) 
C31 0.0151(14) 0.0158(14) 0.0127(15) -0.0030(12) 0.0050(12) 0.0006(12) 
N32 0.0114(12) 0.0154(12) 0.0207(13) 0.0004(9) -0.0023(10) -0.0007(9) 
C32 0.0204(17) 0.0178(16) 0.0149(16) 0.0003(10) -0.0061(12) -0.0032(11) 
N33 0.0134(13) 0.0710(18) 0.0194(14) -0.0009(14) 0.0002(11) 0.0087(13) 
N41 0.0182(14) 0.0142(13) 0.0214(15) 0.0009(9) 0.0013(11) 0.0020(9) 
C41 0.0147(15) 0.0203(17) 0.0214(18) -0.0046(12) -0.0011(13) -0.0029(11) 
N42 0.0229(14) 0.0135(13) 0.0283(16) 0.0034(11) -0.0025(12) 0.0018(11) 
C42 0.0200(17) 0.0127(15) 0.0256(17) 0.0008(12) -0.0063(14) 0.0057(12) 
N43 0.0203(15) 0.0100(13) 0.079(2) 0.0024(13) -0.0113(15) -0.0001(10) 
N51 0.0165(13) 0.0214(13) 0.0157(13) -0.0040(10) 0.0028(10) -0.0003(10) 
C51 0.0190(18) 0.0237(16) 0.0160(16) -0.0089(11) 0.0049(13) -0.0020(12) 
N52 0.0120(12) 0.0208(14) 0.0179(13) -0.0016(9) -0.0003(11) -0.0014(10) 
C52 0.0143(15) 0.0227(15) 0.0187(16) -0.0048(13) -0.0046(12) -0.0044(13) 
N53 0.0167(16) 0.069(2) 0.057(2) -0.0404(16) 0.0125(15) -0.0083(14) 
N61 0.0222(14) 0.0117(12) 0.0230(15) -0.0021(10) -0.0027(12) -0.0007(10) 
C61 0.0130(15) 0.0158(15) 0.0186(16) -0.0079(12) -0.0038(13) 0.0035(11) 
N62 0.0192(14) 0.0161(13) 0.0202(15) -0.0020(10) 0.0044(11) -0.0036(10) 
C62 0.0138(15) 0.0143(15) 0.0148(16) 0.0017(11) -0.0003(12) 0.0011(11) 
N63 0.0265(15) 0.0101(12) 0.0180(14) -0.0007(9) 0.0010(11) -0.0039(10) 
P1 0.0125(4) 0.0146(3) 0.0157(4) 0.0003(3) 0.0028(3) 0.0005(3) 
C111 0.0122(15) 0.0123(13) 0.0209(16) -0.0028(11) -0.0004(13) 0.0007(11) 
C112 0.0167(16) 0.0152(14) 0.0175(16) -0.0039(11) -0.0005(13) -0.0021(11) 
C113 0.0180(17) 0.0199(15) 0.0234(18) -0.0007(12) -0.0056(14) 0.0017(12) 
C114 0.0130(17) 0.0212(16) 0.032(2) -0.0066(13) -0.0031(14) 0.0049(12) 
C115 0.0191(18) 0.0297(16) 0.0241(18) -0.0067(13) 0.0067(14) 0.0033(14) 
C116 0.0203(17) 0.0268(16) 0.0141(16) 0.0010(11) 0.0015(13) 0.0046(13) 
C121 0.0124(15) 0.0160(14) 0.0146(16) 0.0005(11) 0.0035(12) 0.0030(11) 
C122 0.0139(16) 0.0198(15) 0.0174(17) -0.0006(11) -0.0009(13) -0.0033(12) 
C123 0.0195(17) 0.0231(16) 0.0210(18) 0.0038(12) 0.0021(14) -0.0047(12) 
C124 0.0207(17) 0.0266(16) 0.0173(17) 0.0020(12) 0.0058(13) 0.0047(13) 
C125 0.042(2) 0.0227(17) 0.0181(18) -0.0061(12) 0.0078(16) 0.0009(14) 
C126 0.0309(19) 0.0156(15) 0.0248(19) -0.0032(13) 0.0069(15) -0.0021(13) 
C131 0.0106(15) 0.0237(16) 0.0160(16) 0.0018(12) 0.0022(12) 0.0002(12) 
C132 0.0269(18) 0.0215(15) 0.0199(18) -0.0004(13) 0.0007(15) -0.0025(13) 
C133 0.039(2) 0.0330(18) 0.020(2) -0.0065(14) 0.0021(16) -0.0122(15) 
C134 0.031(2) 0.057(2) 0.0179(19) 0.0012(16) -0.0044(16) -0.0143(17) 
C135 0.0201(19) 0.060(2) 0.0255(19) 0.0008(16) -0.0078(16) 0.0044(15) 
C136 0.0250(19) 0.0327(17) 0.0230(19) -0.0046(13) 0.0023(15) 0.0059(14) 
C140 0.0203(17) 0.0170(15) 0.0296(19) 0.0017(12) 0.0052(14) 0.0034(12) 
C141 0.046(2) 0.0258(17) 0.035(2) 0.0106(15) 0.0105(18) -0.0020(15) 
P2 0.0136(4) 0.0130(3) 0.0143(4) -0.0012(3) -0.0028(3) 0.0009(3) 
C211 0.0163(16) 0.0154(14) 0.0109(15) -0.0024(11) -0.0009(12) 0.0043(12) 
C212 0.0225(18) 0.0233(15) 0.0222(18) -0.0013(12) -0.0041(14) 0.0038(12) 
C213 0.0244(19) 0.0378(19) 0.029(2) -0.0035(15) -0.0086(15) 0.0101(14) 
C214 0.041(2) 0.0287(18) 0.027(2) 0.0004(14) -0.0123(16) 0.0213(15) 
C215 0.039(2) 0.0199(15) 0.0266(18) 0.0075(13) -0.0009(17) 0.0079(14) 
C216 0.0233(18) 0.0199(15) 0.0226(18) -0.0015(13) -0.0027(14) 0.0038(12) 
C221 0.0153(16) 0.0164(14) 0.0196(17) 0.0018(11) -0.0035(13) 0.0013(11) 
C222 0.0238(19) 0.0307(17) 0.0227(19) 0.0009(13) -0.0030(15) -0.0034(14) 
C223 0.0279(19) 0.0430(19) 0.023(2) 0.0097(15) -0.0017(16) 0.0050(15) 
C224 0.0262(19) 0.0242(19) 0.041(2) 0.0111(14) 0.0091(15) 0.0023(13) 
C225 0.0280(19) 0.0202(18) 0.038(2) 0.0000(13) 0.0035(15) -0.0084(12) 
C226 0.0280(19) 0.0222(15) 0.0286(19) -0.0010(13) -0.0048(16) -0.0048(13) 
C231 0.0136(14) 0.0132(13) 0.0127(15) 0.0010(10) -0.0018(13) -0.0019(11) 
C232 0.0185(17) 0.0201(15) 0.0233(18) -0.0041(12) -0.0004(14) 0.0020(12) 
C233 0.0217(18) 0.0202(16) 0.0218(18) -0.0061(12) -0.0010(14) -0.0043(12) 
C234 0.0185(18) 0.0240(16) 0.0255(18) 0.0017(12) -0.0109(15) -0.0083(13) 
C235 0.0136(16) 0.0191(15) 0.036(2) 0.0007(13) -0.0056(15) 0.0040(12) 
C236 0.0175(15) 0.0119(13) 0.0175(16) -0.0012(11) -0.0024(13) 0.0004(11) 
C240 0.0212(16) 0.0158(14) 0.0132(17) -0.0071(11) -0.0049(13) 0.0030(11) 
C241 0.0235(19) 0.0275(16) 0.0205(18) -0.0075(13) 0.0028(14) 0.0010(13) 
  
_geom_special_details 
; 
 All esds (except the esd in the dihedral angle between two l.s. planes) 
 are estimated using the full covariance matrix.  The cell esds are taken 
 into account individually in the estimation of esds in distances, angles 
 and torsion angles; correlations between esds in cell parameters are only 
 used when they are defined by crystal symmetry.  An approximate (isotropic) 
 treatment of cell esds is used for estimating esds involving l.s. planes. 
; 
  
loop_ 
 _geom_bond_atom_site_label_1 
 _geom_bond_atom_site_label_2 
 _geom_bond_distance 
 _geom_bond_site_symmetry_2 
 _geom_bond_publ_flag 
Ni1 N41 2.056(2) . ? 
Ni1 N11 2.059(2) . ? 
Ni1 N62 2.070(2) 4_546 ? 
Ni1 N31 2.094(2) . ? 
Ni1 N32 2.101(2) 3_457 ? 
Ni1 N21 2.119(2) . ? 
Ni2 N12 2.062(2) . ? 
Ni2 N52 2.073(2) 3_456 ? 
Ni2 N42 2.085(2) 4_546 ? 
Ni2 N61 2.087(2) . ? 
Ni2 N51 2.090(2) . ? 
Ni2 N22 2.094(2) . ? 
N11 C11 1.146(3) . ? 
C11 N13 1.315(4) . ? 
N12 C12 1.140(3) . ? 
C12 N13 1.309(4) . ? 
N21 C21 1.155(3) . ? 
C21 N23 1.305(4) . ? 
N22 C22 1.149(3) . ? 
C22 N23 1.323(4) . ? 
N31 C31 1.145(3) . ? 
C31 N33 1.304(4) . ? 
N32 C32 1.145(3) . ? 
N32 Ni1 2.101(2) 3_557 ? 
C32 N33 1.319(4) . ? 
N41 C41 1.153(3) . ? 
C41 N43 1.306(4) . ? 
N42 C42 1.143(3) . ? 
N42 Ni2 2.085(2) 4_556 ? 
C42 N43 1.312(4) . ? 
N51 C51 1.151(3) . ? 
C51 N53 1.309(4) . ? 
N52 C52 1.150(3) . ? 
N52 Ni2 2.073(2) 3_556 ? 
C52 N53 1.310(4) . ? 
N61 C61 1.167(3) . ? 
C61 N63 1.302(4) . ? 
N62 C62 1.149(3) . ? 
N62 Ni1 2.070(2) 4_556 ? 
C62 N63 1.312(3) . ? 
P1 C121 1.788(3) . ? 
P1 C131 1.791(3) . ? 
P1 C140 1.797(3) . ? 
P1 C111 1.801(3) . ? 
C111 C112 1.391(4) . ? 
C111 C116 1.397(4) . ? 
C112 C113 1.389(4) . ? 
C113 C114 1.380(4) . ? 
C114 C115 1.379(4) . ? 
C115 C116 1.384(4) . ? 
C121 C126 1.395(4) . ? 
C121 C122 1.396(4) . ? 
C122 C123 1.378(4) . ? 
C123 C124 1.380(4) . ? 
C124 C125 1.377(4) . ? 
C125 C126 1.374(4) . ? 
C131 C132 1.394(4) . ? 
C131 C136 1.399(4) . ? 
C132 C133 1.383(4) . ? 
C133 C134 1.376(5) . ? 
C134 C135 1.385(5) . ? 
C135 C136 1.378(4) . ? 
C140 C141 1.533(4) . ? 
P2 C231 1.795(3) . ? 
P2 C221 1.798(3) . ? 
P2 C240 1.804(3) . ? 
P2 C211 1.804(3) . ? 
C211 C212 1.375(4) . ? 
C211 C216 1.401(4) . ? 
C212 C213 1.393(4) . ? 
C213 C214 1.381(4) . ? 
C214 C215 1.373(4) . ? 
C215 C216 1.380(4) . ? 
C221 C222 1.388(4) . ? 
C221 C226 1.396(4) . ? 
C222 C223 1.398(4) . ? 
C223 C224 1.375(4) . ? 
C224 C225 1.371(4) . ? 
C225 C226 1.386(4) . ? 
C231 C236 1.391(4) . ? 
C231 C232 1.398(4) . ? 
C232 C233 1.380(4) . ? 
C233 C234 1.367(4) . ? 
C234 C235 1.396(4) . ? 
C235 C236 1.378(4) . ? 
C240 C241 1.532(4) . ? 
  
loop_ 
 _geom_angle_atom_site_label_1 
 _geom_angle_atom_site_label_2 
 _geom_angle_atom_site_label_3 
 _geom_angle 
 _geom_angle_site_symmetry_1 
 _geom_angle_site_symmetry_3 
 _geom_angle_publ_flag 
N41 Ni1 N11 92.48(9) . . ? 
N41 Ni1 N62 176.26(10) . 4_546 ? 
N11 Ni1 N62 91.16(9) . 4_546 ? 
N41 Ni1 N31 89.83(9) . . ? 
N11 Ni1 N31 175.94(9) . . ? 
N62 Ni1 N31 86.59(9) 4_546 . ? 
N41 Ni1 N32 89.18(8) . 3_457 ? 
N11 Ni1 N32 85.74(9) . 3_457 ? 
N62 Ni1 N32 90.22(8) 4_546 3_457 ? 
N31 Ni1 N32 97.64(9) . 3_457 ? 
N41 Ni1 N21 88.78(9) . . ? 
N11 Ni1 N21 85.05(9) . . ? 
N62 Ni1 N21 92.40(9) 4_546 . ? 
N31 Ni1 N21 91.66(9) . . ? 
N32 Ni1 N21 170.47(9) 3_457 . ? 
N12 Ni2 N52 86.64(9) . 3_456 ? 
N12 Ni2 N42 94.02(9) . 4_546 ? 
N52 Ni2 N42 90.68(9) 3_456 4_546 ? 
N12 Ni2 N61 93.34(9) . . ? 
N52 Ni2 N61 88.51(9) 3_456 . ? 
N42 Ni2 N61 172.53(9) 4_546 . ? 
N12 Ni2 N51 177.23(9) . . ? 
N52 Ni2 N51 96.10(9) 3_456 . ? 
N42 Ni2 N51 86.41(9) 4_546 . ? 
N61 Ni2 N51 86.29(9) . . ? 
N12 Ni2 N22 85.45(9) . . ? 
N52 Ni2 N22 172.01(9) 3_456 . ? 
N42 Ni2 N22 88.78(9) 4_546 . ? 
N61 Ni2 N22 93.05(9) . . ? 
N51 Ni2 N22 91.83(9) . . ? 
C11 N11 Ni1 168.5(2) . . ? 
N11 C11 N13 175.1(3) . . ? 
C12 N12 Ni2 160.6(2) . . ? 
N12 C12 N13 175.5(3) . . ? 
C12 N13 C11 116.8(2) . . ? 
C21 N21 Ni1 154.0(2) . . ? 
N21 C21 N23 173.4(3) . . ? 
C22 N22 Ni2 163.6(2) . . ? 
N22 C22 N23 173.0(3) . . ? 
C21 N23 C22 119.4(3) . . ? 
C31 N31 Ni1 142.2(2) . . ? 
N31 C31 N33 173.1(3) . . ? 
C32 N32 Ni1 153.3(2) . 3_557 ? 
N32 C32 N33 173.1(3) . . ? 
C31 N33 C32 121.3(2) . . ? 
C41 N41 Ni1 177.5(2) . . ? 
N41 C41 N43 171.6(3) . . ? 
C42 N42 Ni2 155.7(2) . 4_556 ? 
N42 C42 N43 172.2(3) . . ? 
C41 N43 C42 122.6(3) . . ? 
C51 N51 Ni2 161.3(2) . . ? 
N51 C51 N53 171.4(3) . . ? 
C52 N52 Ni2 155.2(2) . 3_556 ? 
N52 C52 N53 170.8(3) . . ? 
C51 N53 C52 122.7(3) . . ? 
C61 N61 Ni2 148.1(2) . . ? 
N61 C61 N63 172.8(3) . . ? 
C62 N62 Ni1 173.1(2) . 4_556 ? 
N62 C62 N63 174.1(3) . . ? 
C61 N63 C62 122.1(2) . . ? 
C121 P1 C131 109.58(13) . . ? 
C121 P1 C140 110.28(13) . . ? 
C131 P1 C140 110.10(14) . . ? 
C121 P1 C111 106.39(12) . . ? 
C131 P1 C111 111.14(12) . . ? 
C140 P1 C111 109.30(13) . . ? 
C112 C111 C116 120.5(3) . . ? 
C112 C111 P1 119.3(2) . . ? 
C116 C111 P1 120.1(2) . . ? 
C113 C112 C111 119.8(3) . . ? 
C114 C113 C112 119.7(3) . . ? 
C115 C114 C113 120.4(3) . . ? 
C114 C115 C116 121.0(3) . . ? 
C115 C116 C111 118.6(3) . . ? 
C126 C121 C122 119.2(3) . . ? 
C126 C121 P1 122.1(2) . . ? 
C122 C121 P1 118.1(2) . . ? 
C123 C122 C121 120.2(3) . . ? 
C122 C123 C124 120.2(3) . . ? 
C125 C124 C123 119.7(3) . . ? 
C126 C125 C124 121.0(3) . . ? 
C125 C126 C121 119.6(3) . . ? 
C132 C131 C136 119.6(3) . . ? 
C132 C131 P1 121.9(2) . . ? 
C136 C131 P1 118.4(2) . . ? 
C133 C132 C131 119.7(3) . . ? 
C134 C133 C132 120.2(3) . . ? 
C133 C134 C135 120.6(3) . . ? 
C136 C135 C134 119.7(3) . . ? 
C135 C136 C131 120.1(3) . . ? 
C141 C140 P1 114.6(2) . . ? 
C231 P2 C221 109.69(13) . . ? 
C231 P2 C240 110.50(13) . . ? 
C221 P2 C240 108.66(13) . . ? 
C231 P2 C211 109.27(12) . . ? 
C221 P2 C211 112.72(13) . . ? 
C240 P2 C211 105.94(12) . . ? 
C212 C211 C216 120.6(3) . . ? 
C212 C211 P2 120.4(2) . . ? 
C216 C211 P2 118.4(2) . . ? 
C211 C212 C213 119.7(3) . . ? 
C214 C213 C212 119.5(3) . . ? 
C215 C214 C213 120.7(3) . . ? 
C214 C215 C216 120.5(3) . . ? 
C215 C216 C211 118.9(3) . . ? 
C222 C221 C226 119.9(3) . . ? 
C222 C221 P2 120.0(2) . . ? 
C226 C221 P2 120.0(2) . . ? 
C221 C222 C223 119.4(3) . . ? 
C224 C223 C222 120.3(3) . . ? 
C225 C224 C223 120.3(3) . . ? 
C224 C225 C226 120.6(3) . . ? 
C225 C226 C221 119.5(3) . . ? 
C236 C231 C232 119.5(3) . . ? 
C236 C231 P2 121.12(19) . . ? 
C232 C231 P2 119.3(2) . . ? 
C233 C232 C231 120.0(3) . . ? 
C234 C233 C232 120.0(3) . . ? 
C233 C234 C235 120.8(3) . . ? 
C236 C235 C234 119.4(3) . . ? 
C235 C236 C231 120.2(2) . . ? 
C241 C240 P2 111.44(18) . . ? 
  
_diffrn_measured_fraction_theta_max    0.971 
_diffrn_reflns_theta_full              27.50 
_diffrn_measured_fraction_theta_full   0.992 
_refine_diff_density_max    0.527 
_refine_diff_density_min   -0.465 
_refine_diff_density_rms    0.075 

_publ_contact_author
;
    Dr. S.R. Batten
    School of Chemistry
    Monash University 3800
    AUSTRALIA
;

_publ_contact_author_phone            ' +61 3 9905 4606 '
_publ_contact_author_fax              ' +61 3 9905 4597 '
_publ_contact_author_email            ' 
stuart.batten@sci.monash.edu.au '

loop_
_publ_author_name
_publ_author_address
'van der Werff, Patricia M.' 
; 
School of Chemistry
Monash University 3800
AUSTRALIA
;
'Batten, Stuart R.' 
; 
School of Chemistry
Monash University 3800
Australia
;
'Jensen, Paul' 
; 
Department of Chemistry
Trinity College
Dublin 2
Ireland
;
'Moubaraki, Boujemaa' 
; 
School of Chemistry
Monash University 3800
Australia
;
'Murray, Keith S.' 
; 
School of Chemistry
Monash University 3800
Australia
;
'Cashion, John D.' 
; 
School of Physics and Materials Engineering
Monash University 3800
Australia
;

_publ_section_title
;
 Structure and magnetism of 3D anionic metal dicyanamide
 (MePh3P)[M(dca)3] (M = Fe, Co, Ni) and (EtPh3P)[M(dca)3]
 (M = Mn, Co, Ni) networks
;


#=END OF CIF
